# Supplementary material for: Hydrogen-Bond-Driven Peptide Nanotube Formation: A DFT Study
Source: MDPI journal article supplement (doi:10.3390/molecules28176217), 2023-08-24
Supplement: s1 [file s1]

Optimized geometries for [P-CH<sub>2</sub>-P]<sub>n</sub> Nanotubes, S1.

Optimized geometries for [P-(CH<sub>2</sub>)<sub>7</sub>-P]<sub>n</sub> Nanotubes, S2.

Optimized geometries for Nanotube Dimers, S3.
