# Supplementary material for: Hydrogen-Bond-Driven Peptide Nanotube Formation: A DFT Study
Source: MDPI journal article supplement (doi:10.3390/molecules28176217), 2023-08-24
Supplement: s1 [file s1]

## Optimized [P-(CH<sub>2</sub>)<sub>7</sub>-P]<sub>n</sub> Nanotubes, (n = 4, 6, 8, 10, 12, 16)

### Partially Folded [P-(CH<sub>2</sub>)<sub>7</sub>-P]<sub>4</sub>

|   |             |             |             |
|---|-------------|-------------|-------------|
| C | 8.56579800  | -6.47166900 | 1.80880800  |
| O | 8.42718900  | -7.24571000 | 2.75543000  |
| C | 8.65098300  | -2.93368200 | -1.17443300 |
| O | 8.83938600  | -4.11910500 | -0.89397800 |
| H | 9.37984900  | -1.11707000 | -1.79857200 |
| H | 9.72255700  | -5.26072800 | 0.64984300  |
| C | 7.27692000  | -2.26547800 | -1.08832800 |
| H | 7.17396800  | -1.93077200 | -0.04170600 |
| H | 7.25946400  | -1.37278700 | -1.71272400 |
| C | 7.38140200  | -5.99934500 | 0.97069700  |
| H | 7.23144900  | -4.92643900 | 1.14551900  |
| H | 7.59787900  | -6.09684700 | -0.09643400 |
| C | 5.03944200  | -6.52490700 | 0.67053700  |
| O | 4.95821300  | -5.67645700 | -0.22998700 |
| C | 5.05732500  | -2.50589600 | -2.03402200 |
| O | 5.02026400  | -1.29481300 | -2.30299200 |
| C | 3.87182200  | -3.40884600 | -2.34830500 |
| H | 4.00421400  | -4.39432300 | -1.89389600 |
| H | 3.85934500  | -3.54284400 | -3.43946500 |
| C | 3.84857800  | -7.38722500 | 1.06988900  |
| H | 4.04038000  | -7.89318300 | 2.02442400  |
| H | 3.75638900  | -8.17577300 | 0.30929300  |
| N | 6.19771600  | -6.74341000 | 1.32502400  |
| N | 6.14895500  | -3.09145300 | -1.47280900 |
| H | 6.29484300  | -7.39907500 | 2.09261200  |
| H | 6.06207900  | -4.03954300 | -1.10784200 |
| N | 9.63712300  | -2.05757200 | -1.49378100 |
| N | 9.74269100  | -5.93545600 | 1.41102000  |
| C | 10.96730600 | -6.08439000 | 2.17016500  |
| H | 11.57777400 | -6.92310400 | 1.81132700  |
| H | 10.71261400 | -6.31114300 | 3.21125400  |
| C | 11.05336400 | -2.38196800 | -1.40147300 |

|   |             |             |             |
|---|-------------|-------------|-------------|
| H | 11.51038600 | -2.42088900 | -2.39845000 |
| H | 11.15393300 | -3.35217900 | -0.91975100 |
| C | 11.76755400 | -1.31204200 | -0.57435100 |
| O | 12.24986900 | -1.47624800 | 0.53368500  |
| C | 11.85654500 | -4.84547900 | 2.13235500  |
| O | 12.99071200 | -4.83556300 | 2.55303400  |
| O | 11.77260100 | -0.14554100 | -1.21900000 |
| H | 12.10085600 | 0.60410300  | -0.65571900 |
| O | 11.23601200 | -3.79425700 | 1.56986200  |
| H | 11.85120700 | -3.02846700 | 1.45206800  |
| C | 2.54509100  | -6.57959100 | 1.12234300  |
| C | 1.28928900  | -7.44387000 | 1.28481200  |
| H | 2.47335900  | -5.99722700 | 0.19661600  |
| H | 2.60159500  | -5.84946500 | 1.94188900  |
| C | 0.00060900  | -6.61287100 | 1.23950300  |
| H | 1.26247900  | -8.19564200 | 0.48189300  |
| H | 1.33650100  | -8.00663300 | 2.22863000  |
| H | 0.00064800  | -5.89147300 | 2.06981700  |
| H | 0.00064300  | -6.01213500 | 0.31778300  |
| C | 2.54757500  | -2.76690100 | -1.90020000 |
| C | 1.29591300  | -3.54161700 | -2.33525400 |
| H | 2.50434900  | -1.74741200 | -2.30110400 |
| H | 2.55043900  | -2.67001600 | -0.80516000 |
| H | 1.29723600  | -3.65427500 | -3.42961500 |
| H | 1.32561500  | -4.56096600 | -1.92295400 |
| C | -8.56515800 | -6.47275500 | 1.80735700  |
| O | -8.42690300 | -7.24753000 | 2.75343000  |
| C | -8.64976600 | -2.93317700 | -1.17457000 |
| O | -8.83787600 | -4.11871700 | -0.89439700 |
| H | -9.37912000 | -1.11665500 | -1.79846600 |
| H | -9.72168100 | -5.26149100 | 0.64845700  |
| C | -7.27589200 | -2.26465000 | -1.08796700 |
| H | -7.17327600 | -1.93003500 | -0.04128500 |
| H | -7.25844200 | -1.37189300 | -1.71227100 |
| C | -7.38035100 | -5.99912000 | 0.97057000  |

|   |              |             |             |
|---|--------------|-------------|-------------|
| H | -7.23092500  | -4.92632600 | 1.14657500  |
| H | -7.59603900  | -6.09564100 | -0.09680200 |
| C | -5.03825200  | -6.52428200 | 0.67075200  |
| O | -4.95692000  | -5.67549000 | -0.22943700 |
| C | -5.05604800  | -2.50488600 | -2.03326800 |
| O | -5.01882400  | -1.29375100 | -2.30198100 |
| C | -3.87069200  | -3.40795200 | -2.34778300 |
| H | -4.00315900  | -4.39345400 | -1.89345200 |
| H | -3.85839800  | -3.54184600 | -3.43895900 |
| C | -3.84744700  | -7.38677100 | 1.06993100  |
| H | -4.03927500  | -7.89281600 | 2.02441600  |
| H | -3.75537800  | -8.17525600 | 0.30925100  |
| N | -6.19663200  | -6.74311200 | 1.32494600  |
| N | -6.14775300  | -3.09046600 | -1.47224800 |
| H | -6.29394500  | -7.39935400 | 2.09201700  |
| H | -6.06096600  | -4.03862000 | -1.10743300 |
| N | -9.63611200  | -2.05733900 | -1.49400100 |
| N | -9.74200200  | -5.93674200 | 1.40916200  |
| C | -10.96716800 | -6.08714000 | 2.16712700  |
| H | -11.57659300 | -6.92618800 | 1.80729200  |
| H | -10.71323400 | -6.31424100 | 3.20832800  |
| C | -11.05222900 | -2.38241300 | -1.40232000 |
| H | -11.50888200 | -2.42107800 | -2.39948800 |
| H | -11.15253400 | -3.35291600 | -0.92114000 |
| C | -11.76743400 | -1.31333700 | -0.57500200 |
| O | -12.25154400 | -1.47877700 | 0.53206000  |
| C | -11.85744600 | -4.84898600 | 2.12920600  |
| O | -12.99197900 | -4.84027000 | 2.54891500  |
| O | -11.77137600 | -0.14609700 | -1.21833600 |
| H | -12.10066800 | 0.60290800  | -0.65484200 |
| O | -11.23735300 | -3.79691700 | 1.56780100  |
| H | -11.85310000 | -3.03158700 | 1.44999400  |
| C | -2.54387400  | -6.57929200 | 1.12243700  |
| C | -1.28816500  | -7.44372600 | 1.28480300  |
| H | -2.47209800  | -5.99683400 | 0.19677200  |

|   |             |             |             |
|---|-------------|-------------|-------------|
| H | -2.60028100 | -5.84924300 | 1.94205700  |
| H | -1.26146400 | -8.19545000 | 0.48183600  |
| H | -1.33540800 | -8.00654400 | 2.22858700  |
| C | -2.54626900 | -2.76628200 | -1.89982100 |
| C | -1.29484700 | -3.54127200 | -2.33508500 |
| H | -2.50288400 | -1.74678200 | -2.30068400 |
| H | -2.54896600 | -2.66945100 | -0.80477600 |
| H | -1.29635600 | -3.65389000 | -3.42945000 |
| H | -1.32474300 | -4.56062900 | -1.92281900 |
| C | 0.00065300  | -2.84327700 | -1.89477000 |
| H | 0.00076400  | -1.81597800 | -2.28971000 |
| H | 0.00073900  | -2.74379100 | -0.79907900 |
| C | 8.35900100  | 1.49973400  | -1.39100700 |
| O | 8.60886100  | 0.58543600  | -2.18506900 |
| C | 7.81444600  | 5.08599500  | 1.52275200  |
| O | 8.55447300  | 4.15961100  | 1.16662100  |
| H | 7.56047500  | 7.08395000  | 1.82315400  |
| H | 8.88881500  | 3.27831600  | -0.52594800 |
| C | 6.35667900  | 4.86493900  | 1.93608400  |
| H | 6.20571800  | 3.78969000  | 2.04074000  |
| H | 6.18009100  | 5.34848900  | 2.90266700  |
| C | 7.10579600  | 1.46688100  | -0.50830300 |
| H | 7.21791100  | 0.62375500  | 0.18398300  |
| H | 7.01192500  | 2.38153300  | 0.07577900  |
| C | 5.05372300  | 2.31388400  | -1.54258500 |
| O | 5.23058400  | 3.45757400  | -1.09574900 |
| C | 5.04145700  | 6.69301100  | 0.97399500  |
| O | 5.58385700  | 7.52477300  | 1.71477500  |
| C | 3.86631000  | 7.04222500  | 0.07351000  |
| H | 3.82482300  | 6.35110700  | -0.77771600 |
| H | 4.02279300  | 8.05441900  | -0.31301000 |
| C | 3.84282300  | 1.97312100  | -2.39345800 |
| H | 3.86088100  | 0.91928300  | -2.68884000 |
| H | 3.90766800  | 2.57783500  | -3.30778600 |
| N | 5.90115100  | 1.28936100  | -1.29275300 |

|   |             |            |             |
|---|-------------|------------|-------------|
| N | 5.39565200  | 5.38180100 | 0.97879500  |
| H | 5.70214200  | 0.36836400 | -1.69191600 |
| H | 5.10780100  | 4.75217300 | 0.22866100  |
| N | 8.24679500  | 6.36411400 | 1.59116900  |
| N | 9.14550400  | 2.58480800 | -1.22878300 |
| C | 10.42293300 | 2.73252900 | -1.91632200 |
| H | 10.35792700 | 3.49346900 | -2.70202800 |
| H | 10.68439500 | 1.77103200 | -2.35608900 |
| C | 9.60500900  | 6.68498000 | 1.20860400  |
| H | 9.72763300  | 7.77233100 | 1.24819200  |
| H | 9.82747200  | 6.34696000 | 0.19320500  |
| C | 10.66353800 | 6.06965900 | 2.12197100  |
| O | 11.74375500 | 5.64962300 | 1.74490200  |
| C | 11.45620500 | 3.15555900 | -0.87889000 |
| O | 12.17908400 | 2.39687900 | -0.25319700 |
| O | 10.31705800 | 6.09678700 | 3.41531100  |
| H | 11.05391300 | 5.69173600 | 3.91236200  |
| O | 11.41420600 | 4.47464200 | -0.69112800 |
| H | 11.87480000 | 4.74784600 | 0.14053600  |
| C | 2.54232300  | 2.30815000 | -1.64880700 |
| C | 1.28444500  | 2.02593700 | -2.47361900 |
| H | 2.56819400  | 3.36388400 | -1.35186100 |
| H | 2.50170300  | 1.72373000 | -0.71849200 |
| C | 0.00021200  | 2.33971800 | -1.70065900 |
| H | 1.31158100  | 2.61383000 | -3.40294700 |
| H | 1.27714500  | 0.96960400 | -2.77982900 |
| H | 0.00009500  | 1.76923800 | -0.75999900 |
| H | 0.00032900  | 3.40132700 | -1.41060600 |
| C | 2.54619100  | 6.97283200 | 0.87186000  |
| C | 1.29149200  | 7.23711800 | 0.02755800  |
| H | 2.59874200  | 7.69117900 | 1.70001400  |
| H | 2.46484800  | 5.97675800 | 1.32836800  |
| H | 1.34001600  | 8.24576500 | -0.40728300 |
| H | 1.27186000  | 6.53698700 | -0.82082100 |
| C | -8.35854100 | 1.50035600 | -1.39061800 |

|   |              |            |             |
|---|--------------|------------|-------------|
| O | -8.60792600  | 0.58600900 | -2.18476800 |
| C | -7.81597700  | 5.08558700 | 1.52449800  |
| O | -8.55591300  | 4.15921600 | 1.16813900  |
| H | -7.56188800  | 7.08355100 | 1.82463400  |
| H | -8.88945200  | 3.27836700 | -0.52506600 |
| C | -6.35820000  | 4.86457200 | 1.93784800  |
| H | -6.20734200  | 3.78935000 | 2.04300500  |
| H | -6.18143200  | 5.34855300 | 2.90418000  |
| C | -7.10515500  | 1.46818800 | -0.50813200 |
| H | -7.21694900  | 0.62538100 | 0.18460300  |
| H | -7.01138100  | 2.38312500 | 0.07550800  |
| C | -5.05327300  | 2.31505000 | -1.54299300 |
| O | -5.23011600  | 3.45894300 | -1.09663200 |
| C | -5.04297300  | 6.69210300 | 0.97483200  |
| O | -5.58512700  | 7.52416600 | 1.71546400  |
| C | -3.86803000  | 7.04090600 | 0.07393700  |
| H | -3.82656900  | 6.34922200 | -0.77682600 |
| H | -4.02471900  | 8.05283000 | -0.31321200 |
| C | -3.84242300  | 1.97404200 | -2.39383200 |
| H | -3.86066800  | 0.92021500 | -2.68923000 |
| H | -3.90706500  | 2.57883100 | -3.30811900 |
| N | -5.90061900  | 1.29057000 | -1.29271000 |
| N | -5.39730500  | 5.38093200 | 0.98015700  |
| H | -5.70153000  | 0.36943900 | -1.69152400 |
| H | -5.10958600  | 4.75107800 | 0.23013500  |
| N | -8.24830600  | 6.36371000 | 1.59292600  |
| N | -9.14569600  | 2.58491300 | -1.22811000 |
| C | -10.42324700 | 2.73204200 | -1.91556100 |
| H | -10.35858000 | 3.49290100 | -2.70137800 |
| H | -10.68439500 | 1.77039500 | -2.35517700 |
| C | -9.60635300  | 6.68471100 | 1.20986100  |
| H | -9.72887600  | 7.77207600 | 1.24938900  |
| H | -9.82851100  | 6.34667200 | 0.19440100  |
| C | -10.66522200 | 6.06950900 | 2.12290900  |
| O | -11.74525500 | 5.64933500 | 1.74549300  |

|   |              |            |             |
|---|--------------|------------|-------------|
| C | -11.45664000 | 3.15483600 | -0.87815700 |
| O | -12.17938200 | 2.39602200 | -0.25248400 |
| O | -10.31924100 | 6.09689000 | 3.41638300  |
| H | -11.05627900 | 5.69191600 | 3.91322500  |
| O | -11.41498000 | 4.47394800 | -0.69045000 |
| H | -11.87585500 | 4.74706100 | 0.14108300  |
| C | -2.54190700  | 2.30875300 | -1.64904400 |
| C | -1.28402200  | 2.02625600 | -2.47374700 |
| H | -2.56756000  | 3.36448600 | -1.35207600 |
| H | -2.50151400  | 1.72428600 | -0.71874800 |
| H | -1.31093100  | 2.61417400 | -3.40306500 |
| H | -1.27694600  | 0.96992700 | -2.77997400 |
| C | -2.54781100  | 6.97226400 | 0.87218900  |
| C | -1.29327500  | 7.23662700 | 0.02767100  |
| H | -2.60051800  | 7.69093100 | 1.70005500  |
| H | -2.46610600  | 5.97639900 | 1.32909300  |
| H | -1.34208500  | 8.24516200 | -0.40740000 |
| H | -1.27357600  | 6.53630200 | -0.82054500 |
| C | -0.00082600  | 7.08103300 | 0.84325700  |
| H | -0.00092400  | 7.80855100 | 1.66779900  |
| H | -0.00062200  | 6.08801100 | 1.31679900  |

### Partially Folded [P-(CH<sub>2</sub>)<sub>7</sub>-P]<sub>6</sub>

|   |             |            |            |
|---|-------------|------------|------------|
| C | 4.50303800  | 7.23106700 | 8.56825300 |
| O | 5.70136900  | 7.50925900 | 8.53192100 |
| C | -0.00905100 | 6.09614400 | 8.58426800 |
| O | 0.89515100  | 6.93214300 | 8.67829000 |
| H | -1.64660200 | 5.16640800 | 9.40581900 |
| H | 2.74327500  | 7.04501200 | 9.58866800 |
| C | -0.18535100 | 5.23173000 | 7.33226800 |
| H | 0.58528600  | 4.44683000 | 7.39086700 |
| H | -1.15966400 | 4.74445500 | 7.33296800 |
| C | 3.74180200  | 6.78771200 | 7.32152400 |
| H | 3.77308700  | 5.68732100 | 7.28285500 |
| H | 2.69230200  | 7.07678400 | 7.37774200 |
| C | 3.62552400  | 7.57836700 | 5.01723300 |

|   |             |            |             |
|---|-------------|------------|-------------|
| O | 2.43315000  | 7.25381400 | 4.92561400  |
| C | -0.96497100 | 5.84067100 | 5.09294600  |
| O | -1.95889300 | 5.10472800 | 5.17297800  |
| C | -0.70085000 | 6.67627700 | 3.84707300  |
| H | 0.27403700  | 7.16829000 | 3.91347900  |
| H | -1.46767200 | 7.46366200 | 3.82968200  |
| C | 4.35109800  | 8.24573400 | 3.85567800  |
| H | 5.42640800  | 8.32609200 | 4.05782700  |
| H | 3.96213800  | 9.27068200 | 3.78074300  |
| N | 4.34479100  | 7.36013400 | 6.13873000  |
| N | -0.05878600 | 5.97569500 | 6.09555100  |
| H | 5.31041900  | 7.65404500 | 6.22950700  |
| H | 0.79776400  | 6.49847900 | 5.91326500  |
| N | -0.87825300 | 5.81396700 | 9.58378500  |
| N | 3.73897400  | 7.23056800 | 9.68312700  |
| C | 4.27820700  | 7.42265100 | 11.01294200 |
| H | 4.35313600  | 8.48433400 | 11.28282600 |
| H | 5.29840300  | 7.02478400 | 11.04978100 |
| C | -0.76109600 | 6.40478700 | 10.91041600 |
| H | -1.59987500 | 7.08411800 | 11.10855100 |
| H | 0.17312200  | 6.96020900 | 10.95533800 |
| C | -0.76636500 | 5.29457300 | 11.95793200 |
| O | 0.17754200  | 4.96836400 | 12.65755200 |
| C | 3.44014100  | 6.74867900 | 12.09535000 |
| O | 3.62822900  | 6.92057500 | 13.27810100 |
| O | -1.95434900 | 4.69141600 | 11.98698900 |
| H | -1.93896300 | 3.83682500 | 12.49461600 |
| O | 2.47715300  | 5.96955600 | 11.57452300 |
| H | 1.86499700  | 5.62436900 | 12.27019600 |
| C | 4.08924300  | 7.50524200 | 2.53626900  |
| C | 4.59148700  | 8.24535000 | 1.29150200  |
| H | 3.00844600  | 7.34294000 | 2.45379100  |
| H | 4.54819600  | 6.50754000 | 2.58315300  |
| C | 4.21964000  | 7.50625000 | 0.00000000  |
| H | 4.15607800  | 9.25543700 | 1.27023800  |



|   |             |            |             |
|---|-------------|------------|-------------|
| H | 5.68148600  | 8.38225800 | 1.34415700  |
| H | 4.69094100  | 6.51235900 | 0.00000000  |
| H | 3.13458600  | 7.32440900 | 0.00000000  |
| C | -0.80315600 | 5.84429200 | 2.55914000  |
| C | -0.65114000 | 6.68708700 | 1.28653000  |
| H | -1.77009900 | 5.32737800 | 2.54911400  |
| H | -0.03142700 | 5.06157200 | 2.57238400  |
| H | -1.41393900 | 7.47996600 | 1.28234800  |
| H | 0.32142500  | 7.20139300 | 1.30001000  |
| C | 4.50303800  | 7.23106700 | -8.56825300 |
| O | 5.70136900  | 7.50925900 | -8.53192100 |
| C | -0.00905100 | 6.09614400 | -8.58426800 |
| O | 0.89515100  | 6.93214300 | -8.67829000 |
| H | -1.64660200 | 5.16640800 | -9.40581900 |
| H | 2.74327500  | 7.04501200 | -9.58866800 |
| C | -0.18535100 | 5.23173000 | -7.33226800 |
| H | 0.58528600  | 4.44683000 | -7.39086700 |
| H | -1.15966400 | 4.74445500 | -7.33296800 |
| C | 3.74180200  | 6.78771200 | -7.32152400 |
| H | 3.77308700  | 5.68732100 | -7.28285500 |
| H | 2.69230200  | 7.07678400 | -7.37774200 |
| C | 3.62552400  | 7.57836700 | -5.01723300 |
| O | 2.43315000  | 7.25381400 | -4.92561400 |
| C | -0.96497100 | 5.84067100 | -5.09294600 |
| O | -1.95889300 | 5.10472800 | -5.17297800 |
| C | -0.70085000 | 6.67627700 | -3.84707300 |
| H | 0.27403700  | 7.16829000 | -3.91347900 |
| H | -1.46767200 | 7.46366200 | -3.82968200 |
| C | 4.35109800  | 8.24573400 | -3.85567800 |
| H | 5.42640800  | 8.32609200 | -4.05782700 |
| H | 3.96213800  | 9.27068200 | -3.78074300 |
| N | 4.34479100  | 7.36013400 | -6.13873000 |
| N | -0.05878600 | 5.97569500 | -6.09555100 |
| H | 5.31041900  | 7.65404500 | -6.22950700 |
| H | 0.79776400  | 6.49847900 | -5.91326500 |

|   |             |             |              |
|---|-------------|-------------|--------------|
| N | -0.87825300 | 5.81396700  | -9.58378500  |
| N | 3.73897400  | 7.23056800  | -9.68312700  |
| C | 4.27820700  | 7.42265100  | -11.01294200 |
| H | 4.35313600  | 8.48433400  | -11.28282600 |
| H | 5.29840300  | 7.02478400  | -11.04978100 |
| C | -0.76109600 | 6.40478700  | -10.91041600 |
| H | -1.59987500 | 7.08411800  | -11.10855100 |
| H | 0.17312200  | 6.96020900  | -10.95533800 |
| C | -0.76636500 | 5.29457300  | -11.95793200 |
| O | 0.17754200  | 4.96836400  | -12.65755200 |
| C | 3.44014100  | 6.74867900  | -12.09535000 |
| O | 3.62822900  | 6.92057500  | -13.27810100 |
| O | -1.95434900 | 4.69141600  | -11.98698900 |
| H | -1.93896300 | 3.83682500  | -12.49461600 |
| O | 2.47715300  | 5.96955600  | -11.57452300 |
| H | 1.86499700  | 5.62436900  | -12.27019600 |
| C | 4.08924300  | 7.50524200  | -2.53626900  |
| C | 4.59148700  | 8.24535000  | -1.29150200  |
| H | 3.00844600  | 7.34294000  | -2.45379100  |
| H | 4.54819600  | 6.50754000  | -2.58315300  |
| H | 4.15607800  | 9.25543700  | -1.27023800  |
| H | 5.68148600  | 8.38225800  | -1.34415700  |
| C | -0.80315600 | 5.84429200  | -2.55914000  |
| C | -0.65114000 | 6.68708700  | -1.28653000  |
| H | -1.77009900 | 5.32737800  | -2.54911400  |
| H | -0.03142700 | 5.06157200  | -2.57238400  |
| H | -1.41393900 | 7.47996600  | -1.28234800  |
| H | 0.32142500  | 7.20139300  | -1.30001000  |
| C | -0.77291600 | 5.85942600  | 0.00000000   |
| H | -1.74079000 | 5.33617100  | 0.00000000   |
| H | -0.00377700 | 5.07285500  | 0.00000000   |
| C | -3.20510800 | 2.68722100  | 8.56567500   |
| O | -2.87991600 | 3.87462200  | 8.66960700   |
| C | -3.67838800 | -1.87783200 | 8.57207400   |
| O | -4.25285900 | -0.79043600 | 8.68927700   |

|   |             |             |             |
|---|-------------|-------------|-------------|
| H | -3.14150500 | -3.69481100 | 9.35772400  |
| H | -4.07346800 | 1.00948500  | 9.36587400  |
| C | -2.91876100 | -2.25311300 | 7.29946600  |
| H | -1.96383000 | -1.70355300 | 7.33459100  |
| H | -2.69122500 | -3.31787500 | 7.28983000  |
| C | -2.87982900 | 1.87883500  | 7.30949700  |
| H | -1.80045800 | 1.66103500  | 7.35061100  |
| H | -3.41501500 | 0.93045800  | 7.30997000  |
| C | -3.88138300 | 1.96807900  | 5.08226400  |
| O | -4.26098500 | 0.78921300  | 5.14373400  |
| C | -3.73995800 | -2.83970500 | 5.07796300  |
| O | -3.24334000 | -3.97452200 | 5.13619900  |
| C | -4.51829100 | -2.37954600 | 3.85338300  |
| H | -4.76745400 | -1.31692700 | 3.93599100  |
| H | -5.46354800 | -2.94044600 | 3.85041500  |
| C | -4.16111700 | 2.82393800  | 3.85410900  |
| H | -3.65586600 | 3.79120400  | 3.93896100  |
| H | -5.24310700 | 3.01708900  | 3.84478200  |
| N | -3.21304200 | 2.58386100  | 6.08989700  |
| N | -3.64608900 | -1.93932500 | 6.08932800  |
| H | -2.83305300 | 3.52028100  | 5.93957100  |
| H | -3.96155500 | -0.98009200 | 5.93227800  |
| N | -3.61071000 | -2.80939600 | 9.55225200  |
| N | -3.82220600 | 1.98286400  | 9.54288100  |
| C | -4.07997200 | 2.53457700  | 10.86474600 |
| H | -5.15448300 | 2.50514500  | 11.08520000 |
| H | -3.73618300 | 3.56662700  | 10.88128900 |
| C | -4.11692000 | -2.57833900 | 10.89700200 |
| H | -4.89704700 | -3.30982300 | 11.14253600 |
| H | -4.53483600 | -1.57490300 | 10.94007700 |
| C | -2.97725300 | -2.72551600 | 11.90417200 |
| O | -2.54259900 | -1.84229000 | 12.62751200 |
| C | -3.34537200 | 1.71326300  | 11.92327100 |
| O | -2.48035500 | 2.12977100  | 12.67816400 |
| O | -2.49071000 | -3.96303900 | 11.87174400 |

|   |             |             |             |
|---|-------------|-------------|-------------|
| H | -1.64014100 | -4.06896600 | 12.37235000 |
| O | -3.76566100 | 0.45215100  | 11.90162200 |
| H | -3.19999500 | -0.16890400 | 12.43257400 |
| C | -3.76431100 | 2.10701100  | 2.55397000  |
| C | -4.15964100 | 2.87861700  | 1.28863700  |
| H | -4.23274500 | 1.11566600  | 2.54435600  |
| H | -2.67800900 | 1.93831600  | 2.55266300  |
| C | -3.75990200 | 2.14741400  | 0.00000000  |
| H | -5.24651100 | 3.04918700  | 1.29033900  |
| H | -3.69472000 | 3.87538000  | 1.30357000  |
| H | -2.67193500 | 1.98461400  | 0.00000000  |
| H | -4.21561700 | 1.14582300  | 0.00000000  |
| C | -3.75478700 | -2.66617800 | 2.55136500  |
| C | -4.55931500 | -2.33529200 | 1.28855300  |
| H | -3.46676700 | -3.72405500 | 2.54062500  |
| H | -2.81951000 | -2.08850300 | 2.54798300  |
| H | -5.49700300 | -2.91071100 | 1.29169700  |
| H | -4.85185500 | -1.27505800 | 1.30385500  |
| C | -3.20510800 | 2.68722100  | -8.56567500 |
| O | -2.87991600 | 3.87462200  | -8.66960700 |
| C | -3.67838800 | -1.87783200 | -8.57207400 |
| O | -4.25285900 | -0.79043600 | -8.68927700 |
| H | -3.14150500 | -3.69481100 | -9.35772400 |
| H | -4.07346800 | 1.00948500  | -9.36587400 |
| C | -2.91876100 | -2.25311300 | -7.29946600 |
| H | -1.96383000 | -1.70355300 | -7.33459100 |
| H | -2.69122500 | -3.31787500 | -7.28983000 |
| C | -2.87982900 | 1.87883500  | -7.30949700 |
| H | -1.80045800 | 1.66103500  | -7.35061100 |
| H | -3.41501500 | 0.93045800  | -7.30997000 |
| C | -3.88138300 | 1.96807900  | -5.08226400 |
| O | -4.26098500 | 0.78921300  | -5.14373400 |
| C | -3.73995800 | -2.83970500 | -5.07796300 |
| O | -3.24334000 | -3.97452200 | -5.13619900 |
| C | -4.51829100 | -2.37954600 | -3.85338300 |

|   |             |             |              |
|---|-------------|-------------|--------------|
| H | -4.76745400 | -1.31692700 | -3.93599100  |
| H | -5.46354800 | -2.94044600 | -3.85041500  |
| C | -4.16111700 | 2.82393800  | -3.85410900  |
| H | -3.65586600 | 3.79120400  | -3.93896100  |
| H | -5.24310700 | 3.01708900  | -3.84478200  |
| N | -3.21304200 | 2.58386100  | -6.08989700  |
| N | -3.64608900 | -1.93932500 | -6.08932800  |
| H | -2.83305300 | 3.52028100  | -5.93957100  |
| H | -3.96155500 | -0.98009200 | -5.93227800  |
| N | -3.61071000 | -2.80939600 | -9.55225200  |
| N | -3.82220600 | 1.98286400  | -9.54288100  |
| C | -4.07997200 | 2.53457700  | -10.86474600 |
| H | -5.15448300 | 2.50514500  | -11.08520000 |
| H | -3.73618300 | 3.56662700  | -10.88128900 |
| C | -4.11692000 | -2.57833900 | -10.89700200 |
| H | -4.89704700 | -3.30982300 | -11.14253600 |
| H | -4.53483600 | -1.57490300 | -10.94007700 |
| C | -2.97725300 | -2.72551600 | -11.90417200 |
| O | -2.54259900 | -1.84229000 | -12.62751200 |
| C | -3.34537200 | 1.71326300  | -11.92327100 |
| O | -2.48035500 | 2.12977100  | -12.67816400 |
| O | -2.49071000 | -3.96303900 | -11.87174400 |
| H | -1.64014100 | -4.06896600 | -12.37235000 |
| O | -3.76566100 | 0.45215100  | -11.90162200 |
| H | -3.19999500 | -0.16890400 | -12.43257400 |
| C | -3.76431100 | 2.10701100  | -2.55397000  |
| C | -4.15964100 | 2.87861700  | -1.28863700  |
| H | -4.23274500 | 1.11566600  | -2.54435600  |
| H | -2.67800900 | 1.93831600  | -2.55266300  |
| H | -5.24651100 | 3.04918700  | -1.29033900  |
| H | -3.69472000 | 3.87538000  | -1.30357000  |
| C | -3.75478700 | -2.66617800 | -2.55136500  |
| C | -4.55931500 | -2.33529200 | -1.28855300  |
| H | -3.46676700 | -3.72405500 | -2.54062500  |
| H | -2.81951000 | -2.08850300 | -2.54798300  |

|   |             |             |             |
|---|-------------|-------------|-------------|
| H | -5.49700300 | -2.91071100 | -1.29169700 |
| H | -4.85185500 | -1.27505800 | -1.30385500 |
| C | -3.78163300 | -2.63292100 | 0.00000000  |
| H | -3.47944300 | -3.69097300 | 0.00000000  |
| H | -2.84774300 | -2.05155700 | 0.00000000  |
| C | -0.88101900 | -5.47431600 | 8.52101700  |
| O | -2.05789600 | -5.13104100 | 8.67183600  |
| C | 3.77407500  | -6.44049000 | 8.30051400  |
| O | 2.57571400  | -6.58452900 | 8.54021000  |
| H | 5.70485800  | -6.50003400 | 8.99608700  |
| H | 0.78362300  | -6.43328100 | 9.24146900  |
| C | 4.27557800  | -6.00443600 | 6.92319500  |
| H | 4.03566600  | -4.93465100 | 6.83271600  |
| H | 5.35803200  | -6.12471000 | 6.83054800  |
| C | -0.09996700 | -5.11422900 | 7.25527000  |
| H | 0.11379400  | -4.03589200 | 7.31544900  |
| H | 0.85042200  | -5.64529600 | 7.21255300  |
| C | -0.30028500 | -6.17354900 | 5.05882900  |
| O | 0.84012400  | -6.65343800 | 5.11728300  |
| C | 4.45379900  | -7.56713500 | 5.05987300  |
| O | 5.65224700  | -7.74216700 | 5.27317300  |
| C | 3.74158700  | -8.19408500 | 3.86799600  |
| H | 2.66410800  | -8.00265400 | 3.91113500  |
| H | 3.89681200  | -9.27867400 | 3.92669100  |
| C | -1.19017000 | -6.40690400 | 3.84811400  |
| H | -2.13043100 | -5.85555100 | 3.94632600  |
| H | -1.43183500 | -7.47866000 | 3.83435100  |
| N | -0.83962200 | -5.41901200 | 6.04934700  |
| N | 3.67987300  | -6.74899100 | 5.84170600  |
| H | -1.74486600 | -4.97095600 | 5.89316700  |
| H | 2.68021200  | -6.65794700 | 5.65974500  |
| N | 4.73412100  | -6.61268400 | 9.25291600  |
| N | -0.17209500 | -6.15212700 | 9.45546400  |
| C | -0.71883400 | -6.47839800 | 10.76546000 |
| H | -0.78333600 | -7.56536200 | 10.89587300 |

|   |             |             |             |
|---|-------------|-------------|-------------|
| H | -1.71301900 | -6.04137800 | 10.83667200 |
| C | 4.40555700  | -6.93230000 | 10.62664300 |
| H | 5.05419400  | -7.73896100 | 10.99195900 |
| H | 3.37261600  | -7.27714400 | 10.65910300 |
| C | 4.55165200  | -5.75985500 | 11.59108100 |
| O | 3.79622500  | -5.51289600 | 12.51381800 |
| C | 0.19291200  | -5.90310300 | 11.84502800 |
| O | -0.05482700 | -4.94438800 | 12.55855800 |
| O | 5.65346500  | -5.03422100 | 11.34765100 |
| H | 5.68516600  | -4.31860000 | 12.01228300 |
| O | 1.34802000  | -6.57037800 | 11.88655400 |
| H | 2.02515400  | -6.10189100 | 12.43370700 |
| C | -0.46766100 | -6.03297800 | 2.54537300  |
| C | -1.26380700 | -6.38994300 | 1.28638500  |
| H | 0.50380700  | -6.54103900 | 2.52596100  |
| H | -0.25537900 | -4.95437800 | 2.54860000  |
| C | -0.51674700 | -6.02124300 | 0.00000000  |
| H | -1.48339200 | -7.46800300 | 1.28663000  |
| H | -2.23799900 | -5.87958500 | 1.30614100  |
| H | -0.30766400 | -4.94126800 | 0.00000000  |
| H | 0.46446900  | -6.51918400 | 0.00000000  |
| C | 4.34099200  | -7.66186000 | 2.55166800  |
| C | 3.72654700  | -8.28578600 | 1.29159300  |
| H | 5.42300000  | -7.83985800 | 2.56880700  |
| H | 4.20573600  | -6.57130300 | 2.51482700  |
| H | 3.86865900  | -9.37633500 | 1.31416500  |
| H | 2.63886400  | -8.11911200 | 1.29233300  |
| C | -0.88101900 | -5.47431600 | -8.52101700 |
| O | -2.05789600 | -5.13104100 | -8.67183600 |
| C | 3.77407500  | -6.44049000 | -8.30051400 |
| O | 2.57571400  | -6.58452900 | -8.54021000 |
| H | 5.70485800  | -6.50003400 | -8.99608700 |
| H | 0.78362300  | -6.43328100 | -9.24146900 |
| C | 4.27557800  | -6.00443600 | -6.92319500 |
| H | 4.03566600  | -4.93465100 | -6.83271600 |

|   |             |             |              |
|---|-------------|-------------|--------------|
| H | 5.35803200  | -6.12471000 | -6.83054800  |
| C | -0.09996700 | -5.11422900 | -7.25527000  |
| H | 0.11379400  | -4.03589200 | -7.31544900  |
| H | 0.85042200  | -5.64529600 | -7.21255300  |
| C | -0.30028500 | -6.17354900 | -5.05882900  |
| O | 0.84012400  | -6.65343800 | -5.11728300  |
| C | 4.45379900  | -7.56713500 | -5.05987300  |
| O | 5.65224700  | -7.74216700 | -5.27317300  |
| C | 3.74158700  | -8.19408500 | -3.86799600  |
| H | 2.66410800  | -8.00265400 | -3.91113500  |
| H | 3.89681200  | -9.27867400 | -3.92669100  |
| C | -1.19017000 | -6.40690400 | -3.84811400  |
| H | -2.13043100 | -5.85555100 | -3.94632600  |
| H | -1.43183500 | -7.47866000 | -3.83435100  |
| N | -0.83962200 | -5.41901200 | -6.04934700  |
| N | 3.67987300  | -6.74899100 | -5.84170600  |
| H | -1.74486600 | -4.97095600 | -5.89316700  |
| H | 2.68021200  | -6.65794700 | -5.65974500  |
| N | 4.73412100  | -6.61268400 | -9.25291600  |
| N | -0.17209500 | -6.15212700 | -9.45546400  |
| C | -0.71883400 | -6.47839800 | -10.76546000 |
| H | -0.78333600 | -7.56536200 | -10.89587300 |
| H | -1.71301900 | -6.04137800 | -10.83667200 |
| C | 4.40555700  | -6.93230000 | -10.62664300 |
| H | 5.05419400  | -7.73896100 | -10.99195900 |
| H | 3.37261600  | -7.27714400 | -10.65910300 |
| C | 4.55165200  | -5.75985500 | -11.59108100 |
| O | 3.79622500  | -5.51289600 | -12.51381800 |
| C | 0.19291200  | -5.90310300 | -11.84502800 |
| O | -0.05482700 | -4.94438800 | -12.55855800 |
| O | 5.65346500  | -5.03422100 | -11.34765100 |
| H | 5.68516600  | -4.31860000 | -12.01228300 |
| O | 1.34802000  | -6.57037800 | -11.88655400 |
| H | 2.02515400  | -6.10189100 | -12.43370700 |
| C | -0.46766100 | -6.03297800 | -2.54537300  |



|   |             |             |             |
|---|-------------|-------------|-------------|
| C | -1.26380700 | -6.38994300 | -1.28638500 |
| H | 0.50380700  | -6.54103900 | -2.52596100 |
| H | -0.25537900 | -4.95437800 | -2.54860000 |
| H | -1.48339200 | -7.46800300 | -1.28663000 |
| H | -2.23799900 | -5.87958500 | -1.30614100 |
| C | 4.34099200  | -7.66186000 | -2.55166800 |
| C | 3.72654700  | -8.28578600 | -1.29159300 |
| H | 5.42300000  | -7.83985800 | -2.56880700 |
| H | 4.20573600  | -6.57130300 | -2.51482700 |
| H | 3.86865900  | -9.37633500 | -1.31416500 |
| H | 2.63886400  | -8.11911200 | -1.29233300 |
| C | 4.32918100  | -7.71401300 | 0.00000000  |
| H | 5.41477600  | -7.89005200 | 0.00000000  |
| H | 4.20107800  | -6.62124400 | 0.00000000  |

**[P-(CH<sub>2</sub>)<sub>7</sub>-P]<sub>4</sub>**

|   |             |             |            |
|---|-------------|-------------|------------|
| C | 1.98669800  | 2.43072700  | 8.68945600 |
| O | 3.05843200  | 1.82558600  | 8.73187000 |
| C | -2.43072700 | 1.98669800  | 8.68945600 |
| O | -1.82558600 | 3.05843200  | 8.73187000 |
| C | -1.98669800 | -2.43072700 | 8.68945600 |
| O | -3.05843200 | -1.82558600 | 8.73187000 |
| C | 2.43072700  | -1.98669800 | 8.68945600 |
| O | 1.82558600  | -3.05843200 | 8.73187000 |
| H | -3.53825800 | 0.54840800  | 9.64969600 |
| H | 0.54840800  | 3.53825800  | 9.64969600 |
| H | -0.54840800 | -3.53825800 | 9.64969600 |
| H | 3.53825800  | -0.54840800 | 9.64969600 |
| C | -2.39238800 | 1.06839300  | 7.47252000 |
| H | -1.49392500 | 0.44103200  | 7.58547900 |
| H | -3.23687200 | 0.37937200  | 7.45790000 |
| C | 1.06839300  | 2.39238800  | 7.47252000 |
| H | 0.44103200  | 1.49392500  | 7.58547900 |
| H | 0.37937200  | 3.23687200  | 7.45790000 |
| C | -1.06839300 | -2.39238800 | 7.47252000 |
| H | -0.44103200 | -1.49392500 | 7.58547900 |

|   |             |             |            |
|---|-------------|-------------|------------|
| H | -0.37937200 | -3.23687200 | 7.45790000 |
| C | 2.39238800  | -1.06839300 | 7.47252000 |
| H | 1.49392500  | -0.44103200 | 7.58547900 |
| H | 3.23687200  | -0.37937200 | 7.45790000 |
| C | 1.20574000  | 2.87709300  | 5.09949100 |
| O | 0.07167100  | 3.37117700  | 5.11733000 |
| C | -2.87709300 | 1.20574000  | 5.09949100 |
| O | -3.37117700 | 0.07167100  | 5.11733000 |
| C | -1.20574000 | -2.87709300 | 5.09949100 |
| O | -0.07167100 | -3.37117700 | 5.11733000 |
| C | 2.87709300  | -1.20574000 | 5.09949100 |
| O | 3.37117700  | -0.07167100 | 5.11733000 |
| C | -2.84527300 | 2.07011300  | 3.84536300 |
| H | -1.99448400 | 2.75899000  | 3.89590900 |
| H | -3.75301800 | 2.69179200  | 3.86562600 |
| C | 2.07011300  | 2.84527300  | 3.84536300 |
| H | 2.75899000  | 1.99448400  | 3.89590900 |
| H | 2.69179200  | 3.75301800  | 3.86562600 |
| C | -2.07011300 | -2.84527300 | 3.84536300 |
| H | -2.75899000 | -1.99448400 | 3.89590900 |
| H | -2.69179200 | -3.75301800 | 3.86562600 |
| C | 2.84527300  | -2.07011300 | 3.84536300 |
| H | 1.99448400  | -2.75899000 | 3.89590900 |
| H | 3.75301800  | -2.69179200 | 3.86562600 |
| N | 1.79340400  | 2.37660300  | 6.22353300 |
| N | -2.37660300 | 1.79340400  | 6.22353300 |
| N | -1.79340400 | -2.37660300 | 6.22353300 |
| N | 2.37660300  | -1.79340400 | 6.22353300 |
| H | 2.59857800  | 1.76137800  | 6.13019600 |
| H | -1.76137800 | 2.59857800  | 6.13019600 |
| H | -2.59857800 | -1.76137800 | 6.13019600 |
| H | 1.76137800  | -2.59857800 | 6.13019600 |
| N | -3.14494300 | 1.48003800  | 9.73300900 |
| N | 1.48003800  | 3.14494300  | 9.73300900 |
| N | -1.48003800 | -3.14494300 | 9.73300900 |

|   |             |             |             |
|---|-------------|-------------|-------------|
| N | 3.14494300  | -1.48003800 | 9.73300900  |
| C | 2.12679500  | 3.18144500  | 11.03297100 |
| H | 2.42352900  | 4.20801200  | 11.28993800 |
| H | 3.02432700  | 2.56588200  | 10.97797500 |
| C | -3.18144500 | 2.12679500  | 11.03297100 |
| H | -4.20801200 | 2.42352900  | 11.28993800 |
| H | -2.56588200 | 3.02432700  | 10.97797500 |
| C | -2.12679500 | -3.18144500 | 11.03297100 |
| H | -2.42352900 | -4.20801200 | 11.28993800 |
| H | -3.02432700 | -2.56588200 | 10.97797500 |
| C | 3.18144500  | -2.12679500 | 11.03297100 |
| H | 2.56588200  | -3.02432700 | 10.97797500 |
| H | 4.20801200  | -2.42352900 | 11.28993800 |
| C | -2.66526800 | 1.21219900  | 12.13661000 |
| O | -1.86941600 | 1.55105600  | 13.00107900 |
| C | 1.21219900  | 2.66526800  | 12.13661000 |
| O | 1.55105600  | 1.86941600  | 13.00107900 |
| C | -1.21219900 | -2.66526800 | 12.13661000 |
| O | -1.55105600 | -1.86941600 | 13.00107900 |
| C | 2.66526800  | -1.21219900 | 12.13661000 |
| O | 1.86941600  | -1.55105600 | 13.00107900 |
| O | -3.19675100 | -0.00081000 | 12.06040500 |
| H | -2.69949900 | -0.63899300 | 12.64776400 |
| O | -0.00081000 | 3.19675100  | 12.06040500 |
| H | -0.63899300 | 2.69949900  | 12.64776400 |
| O | 0.00081000  | -3.19675100 | 12.06040500 |
| H | 0.63899300  | -2.69949900 | 12.64776400 |
| O | 3.19675100  | 0.00081000  | 12.06040500 |
| H | 2.69949900  | 0.63899300  | 12.64776400 |
| C | -1.24733100 | -2.81401800 | 2.55381000  |
| H | -0.52367300 | -3.63716100 | 2.57466000  |
| H | -0.65638300 | -1.88734000 | 2.52662200  |
| C | -2.81401800 | 1.24733100  | 2.55381000  |
| H | -1.88734000 | 0.65638300  | 2.52662200  |
| H | -3.63716100 | 0.52367300  | 2.57466000  |

|   |             |             |             |
|---|-------------|-------------|-------------|
| C | 1.24733100  | 2.81401800  | 2.55381000  |
| H | 0.65638300  | 1.88734000  | 2.52662200  |
| H | 0.52367300  | 3.63716100  | 2.57466000  |
| C | 2.81401800  | -1.24733100 | 2.55381000  |
| H | 3.63716100  | -0.52367300 | 2.57466000  |
| H | 1.88734000  | -0.65638300 | 2.52662200  |
| C | -2.10808200 | -2.90321100 | 1.28764000  |
| H | -2.68670300 | -3.83890000 | 1.30318200  |
| H | -2.84619200 | -2.08815400 | 1.28583000  |
| C | -2.90321100 | 2.10808200  | 1.28764000  |
| H | -3.83890000 | 2.68670300  | 1.30318200  |
| H | -2.08815400 | 2.84619200  | 1.28583000  |
| C | 2.10808200  | 2.90321100  | 1.28764000  |
| H | 2.68670300  | 3.83890000  | 1.30318200  |
| H | 2.84619200  | 2.08815400  | 1.28583000  |
| C | 2.90321100  | -2.10808200 | 1.28764000  |
| H | 3.83890000  | -2.68670300 | 1.30318200  |
| H | 2.08815400  | -2.84619200 | 1.28583000  |
| C | -2.83771400 | 1.27688300  | 0.00000000  |
| H | -1.90659800 | 0.69019300  | 0.00000000  |
| H | -3.65764100 | 0.54327000  | 0.00000000  |
| C | 1.98669800  | 2.43072700  | -8.68945600 |
| O | 3.05843200  | 1.82558600  | -8.73187000 |
| C | -2.43072700 | 1.98669800  | -8.68945600 |
| O | -1.82558600 | 3.05843200  | -8.73187000 |
| C | -1.98669800 | -2.43072700 | -8.68945600 |
| O | -3.05843200 | -1.82558600 | -8.73187000 |
| C | 2.43072700  | -1.98669800 | -8.68945600 |
| O | 1.82558600  | -3.05843200 | -8.73187000 |
| H | -3.53825800 | 0.54840800  | -9.64969600 |
| H | 0.54840800  | 3.53825800  | -9.64969600 |
| H | -0.54840800 | -3.53825800 | -9.64969600 |
| H | 3.53825800  | -0.54840800 | -9.64969600 |
| C | -2.39238800 | 1.06839300  | -7.47252000 |
| H | -1.49392500 | 0.44103200  | -7.58547900 |

|   |             |             |             |
|---|-------------|-------------|-------------|
| H | -3.23687200 | 0.37937200  | -7.45790000 |
| C | 1.06839300  | 2.39238800  | -7.47252000 |
| H | 0.44103200  | 1.49392500  | -7.58547900 |
| H | 0.37937200  | 3.23687200  | -7.45790000 |
| C | -1.06839300 | -2.39238800 | -7.47252000 |
| H | -0.44103200 | -1.49392500 | -7.58547900 |
| H | -0.37937200 | -3.23687200 | -7.45790000 |
| C | 2.39238800  | -1.06839300 | -7.47252000 |
| H | 1.49392500  | -0.44103200 | -7.58547900 |
| H | 3.23687200  | -0.37937200 | -7.45790000 |
| C | 1.20574000  | 2.87709300  | -5.09949100 |
| O | 0.07167100  | 3.37117700  | -5.11733000 |
| C | -2.87709300 | 1.20574000  | -5.09949100 |
| O | -3.37117700 | 0.07167100  | -5.11733000 |
| C | -1.20574000 | -2.87709300 | -5.09949100 |
| O | -0.07167100 | -3.37117700 | -5.11733000 |
| C | 2.87709300  | -1.20574000 | -5.09949100 |
| O | 3.37117700  | -0.07167100 | -5.11733000 |
| C | -2.84527300 | 2.07011300  | -3.84536300 |
| H | -1.99448400 | 2.75899000  | -3.89590900 |
| H | -3.75301800 | 2.69179200  | -3.86562600 |
| C | 2.07011300  | 2.84527300  | -3.84536300 |
| H | 2.75899000  | 1.99448400  | -3.89590900 |
| H | 2.69179200  | 3.75301800  | -3.86562600 |
| C | -2.07011300 | -2.84527300 | -3.84536300 |
| H | -2.75899000 | -1.99448400 | -3.89590900 |
| H | -2.69179200 | -3.75301800 | -3.86562600 |
| C | 2.84527300  | -2.07011300 | -3.84536300 |
| H | 1.99448400  | -2.75899000 | -3.89590900 |
| H | 3.75301800  | -2.69179200 | -3.86562600 |
| N | 1.79340400  | 2.37660300  | -6.22353300 |
| N | -2.37660300 | 1.79340400  | -6.22353300 |
| N | -1.79340400 | -2.37660300 | -6.22353300 |
| N | 2.37660300  | -1.79340400 | -6.22353300 |
| H | 2.59857800  | 1.76137800  | -6.13019600 |

|   |             |             |              |
|---|-------------|-------------|--------------|
| H | -1.76137800 | 2.59857800  | -6.13019600  |
| H | -2.59857800 | -1.76137800 | -6.13019600  |
| H | 1.76137800  | -2.59857800 | -6.13019600  |
| N | -3.14494300 | 1.48003800  | -9.73300900  |
| N | 1.48003800  | 3.14494300  | -9.73300900  |
| N | -1.48003800 | -3.14494300 | -9.73300900  |
| N | 3.14494300  | -1.48003800 | -9.73300900  |
| C | 2.12679500  | 3.18144500  | -11.03297100 |
| H | 2.42352900  | 4.20801200  | -11.28993800 |
| H | 3.02432700  | 2.56588200  | -10.97797500 |
| C | -3.18144500 | 2.12679500  | -11.03297100 |
| H | -4.20801200 | 2.42352900  | -11.28993800 |
| H | -2.56588200 | 3.02432700  | -10.97797500 |
| C | -2.12679500 | -3.18144500 | -11.03297100 |
| H | -2.42352900 | -4.20801200 | -11.28993800 |
| H | -3.02432700 | -2.56588200 | -10.97797500 |
| C | 3.18144500  | -2.12679500 | -11.03297100 |
| H | 2.56588200  | -3.02432700 | -10.97797500 |
| H | 4.20801200  | -2.42352900 | -11.28993800 |
| C | -2.66526800 | 1.21219900  | -12.13661000 |
| O | -1.86941600 | 1.55105600  | -13.00107900 |
| C | 1.21219900  | 2.66526800  | -12.13661000 |
| O | 1.55105600  | 1.86941600  | -13.00107900 |
| C | -1.21219900 | -2.66526800 | -12.13661000 |
| O | -1.55105600 | -1.86941600 | -13.00107900 |
| C | 2.66526800  | -1.21219900 | -12.13661000 |
| O | 1.86941600  | -1.55105600 | -13.00107900 |
| O | -3.19675100 | -0.00081000 | -12.06040500 |
| H | -2.69949900 | -0.63899300 | -12.64776400 |
| O | -0.00081000 | 3.19675100  | -12.06040500 |
| H | -0.63899300 | 2.69949900  | -12.64776400 |
| O | 0.00081000  | -3.19675100 | -12.06040500 |
| H | 0.63899300  | -2.69949900 | -12.64776400 |
| O | 3.19675100  | 0.00081000  | -12.06040500 |
| H | 2.69949900  | 0.63899300  | -12.64776400 |

|   |             |             |             |
|---|-------------|-------------|-------------|
| C | -1.24733100 | -2.81401800 | -2.55381000 |
| H | -0.52367300 | -3.63716100 | -2.57466000 |
| H | -0.65638300 | -1.88734000 | -2.52662200 |
| C | -2.81401800 | 1.24733100  | -2.55381000 |
| H | -1.88734000 | 0.65638300  | -2.52662200 |
| H | -3.63716100 | 0.52367300  | -2.57466000 |
| C | 1.24733100  | 2.81401800  | -2.55381000 |
| H | 0.65638300  | 1.88734000  | -2.52662200 |
| H | 0.52367300  | 3.63716100  | -2.57466000 |
| C | 2.81401800  | -1.24733100 | -2.55381000 |
| H | 3.63716100  | -0.52367300 | -2.57466000 |
| H | 1.88734000  | -0.65638300 | -2.52662200 |
| C | -2.10808200 | -2.90321100 | -1.28764000 |
| H | -2.68670300 | -3.83890000 | -1.30318200 |
| H | -2.84619200 | -2.08815400 | -1.28583000 |
| C | -2.90321100 | 2.10808200  | -1.28764000 |
| H | -3.83890000 | 2.68670300  | -1.30318200 |
| H | -2.08815400 | 2.84619200  | -1.28583000 |
| C | 2.10808200  | 2.90321100  | -1.28764000 |
| H | 2.68670300  | 3.83890000  | -1.30318200 |
| H | 2.84619200  | 2.08815400  | -1.28583000 |
| C | 2.90321100  | -2.10808200 | -1.28764000 |
| H | 3.83890000  | -2.68670300 | -1.30318200 |
| H | 2.08815400  | -2.84619200 | -1.28583000 |
| C | 2.83771400  | -1.27688300 | 0.00000000  |
| C | -1.27688300 | -2.83771400 | 0.00000000  |
| C | 1.27688300  | 2.83771400  | 0.00000000  |
| H | 0.69019300  | 1.90659800  | 0.00000000  |
| H | 0.54327000  | 3.65764100  | 0.00000000  |
| H | -0.69019300 | -1.90659800 | 0.00000000  |
| H | -0.54327000 | -3.65764100 | 0.00000000  |
| H | 3.65764100  | -0.54327000 | 0.00000000  |
| H | 1.90659800  | -0.69019300 | 0.00000000  |

**[P-(CH<sub>2</sub>)<sub>7</sub>-P]<sub>6</sub>**

|   |            |            |            |
|---|------------|------------|------------|
| C | 2.43234200 | 3.74223000 | 8.60348100 |
|---|------------|------------|------------|

|   |             |             |            |
|---|-------------|-------------|------------|
| O | 3.58626000  | 3.31393800  | 8.71474200 |
| C | 4.45703700  | -0.23535500 | 8.60348100 |
| O | 4.66308500  | -1.44882300 | 8.71474200 |
| C | 2.02469500  | -3.97758500 | 8.60348100 |
| O | 1.07682500  | -4.76276100 | 8.71474200 |
| C | -4.45703700 | 0.23535500  | 8.60348100 |
| O | -4.66308500 | 1.44882300  | 8.71474200 |
| C | -2.02469500 | 3.97758500  | 8.60348100 |
| O | -1.07682500 | 4.76276100  | 8.71474200 |
| C | -2.43234200 | -3.74223000 | 8.60348100 |
| O | -3.58626000 | -3.31393800 | 8.71474200 |
| H | 0.82584600  | 4.73614800  | 9.40414000 |
| H | 4.51454800  | 1.65287000  | 9.40414000 |
| H | 3.68870100  | -3.08327800 | 9.40414000 |
| H | -4.51454800 | -1.65287000 | 9.40414000 |
| H | -3.68870100 | 3.08327800  | 9.40414000 |
| H | -0.82584600 | -4.73614800 | 9.40414000 |
| C | 1.58473400  | 3.47040900  | 7.36006700 |
| H | 0.70099100  | 4.10625300  | 7.35256600 |
| H | 1.24351200  | 2.42459200  | 7.43638800 |
| C | 3.79782900  | 0.36278500  | 7.36006700 |
| H | 3.90661500  | 1.44605100  | 7.35256600 |
| H | 2.72151400  | 0.13538300  | 7.43638800 |
| C | 2.21309600  | -3.10762400 | 7.36006700 |
| H | 3.20562400  | -2.66020200 | 7.35256600 |
| H | 1.47800200  | -2.28920900 | 7.43638800 |
| C | -3.79782900 | -0.36278500 | 7.36006700 |
| H | -3.90661500 | -1.44605100 | 7.35256600 |
| H | -2.72151400 | -0.13538300 | 7.43638800 |
| C | -2.21309600 | 3.10762400  | 7.36006700 |
| H | -3.20562400 | 2.66020200  | 7.35256600 |
| H | -1.47800200 | 2.28920900  | 7.43638800 |
| C | -1.58473400 | -3.47040900 | 7.36006700 |
| H | -0.70099100 | -4.10625300 | 7.35256600 |
| H | -1.24351200 | -2.42459200 | 7.43638800 |



|   |             |             |            |
|---|-------------|-------------|------------|
| C | 1.72617800  | 4.35562800  | 5.09058400 |
| O | 0.58394900  | 4.83228600  | 5.15087100 |
| C | 4.63517300  | 0.68290000  | 5.09058400 |
| O | 4.47685700  | 1.91042800  | 5.15087100 |
| C | 2.90899500  | -3.67272800 | 5.09058400 |
| O | 3.89290700  | -2.92185800 | 5.15087100 |
| C | -4.63517300 | -0.68290000 | 5.09058400 |
| O | -4.47685700 | -1.91042800 | 5.15087100 |
| C | -2.90899500 | 3.67272800  | 5.09058400 |
| O | -3.89290700 | 2.92185800  | 5.15087100 |
| C | -1.72617800 | -4.35562800 | 5.09058400 |
| O | -0.58394900 | -4.83228600 | 5.15087100 |
| C | 2.59338700  | 4.51379400  | 3.84880600 |
| H | 3.45478500  | 3.83976600  | 3.90111400 |
| H | 2.98590500  | 5.54084500  | 3.86532600 |
| C | 5.20575400  | 0.01095800  | 3.84880600 |
| H | 5.05272700  | -1.07204800 | 3.90111400 |
| H | 6.29146400  | 0.18455300  | 3.86532600 |
| C | 2.61236700  | -4.50283600 | 3.84880600 |
| H | 1.59794200  | -4.91181400 | 3.90111400 |
| H | 3.30556000  | -5.35629100 | 3.86532600 |
| C | -5.20575400 | -0.01095800 | 3.84880600 |
| H | -5.05272700 | 1.07204800  | 3.90111400 |
| H | -6.29146400 | -0.18455300 | 3.86532600 |
| C | -2.61236700 | 4.50283600  | 3.84880600 |
| H | -1.59794200 | 4.91181400  | 3.90111400 |
| H | -3.30556000 | 5.35629100  | 3.86532600 |
| C | -2.59338700 | -4.51379400 | 3.84880600 |
| H | -3.45478500 | -3.83976600 | 3.90111400 |
| H | -2.98590500 | -5.54084500 | 3.86532600 |
| N | 2.30364600  | 3.68809200  | 6.12421100 |
| N | 4.34580500  | -0.15097000 | 6.12421100 |
| N | 2.04215800  | -3.83906200 | 6.12421100 |
| N | -4.34580500 | 0.15097000  | 6.12421100 |
| N | -2.04215800 | 3.83906200  | 6.12421100 |

|   |             |             |             |
|---|-------------|-------------|-------------|
| N | -2.30364600 | -3.68809200 | 6.12421100  |
| H | 4.34488800  | -1.15900600 | 5.96037300  |
| H | 1.16871600  | -4.34228700 | 5.96037300  |
| H | 3.17617300  | 3.18328100  | 5.96037300  |
| H | -4.34488800 | 1.15900600  | 5.96037300  |
| H | -1.16871600 | 4.34228700  | 5.96037300  |
| H | -3.17617300 | -3.18328100 | 5.96037300  |
| N | 1.78848400  | 4.44135200  | 9.56942200  |
| N | 4.74056600  | 0.67180300  | 9.56942200  |
| N | 2.95208100  | -3.76954900 | 9.56942200  |
| N | -4.74056600 | -0.67180300 | 9.56942200  |
| N | -2.95208100 | 3.76954900  | 9.56942200  |
| N | -1.78848400 | -4.44135200 | 9.56942200  |
| C | 5.24105200  | 0.28673200  | 10.88113500 |
| H | 6.21546700  | 0.75507900  | 11.06914000 |
| H | 5.35304500  | -0.79601300 | 10.89766000 |
| C | 2.37220800  | 4.68225000  | 10.88113500 |
| H | 2.45381500  | 5.76029200  | 11.06914000 |
| H | 3.36589000  | 4.23786600  | 10.89766000 |
| C | -2.86884300 | 4.39551800  | 10.88113500 |
| H | -1.98715500 | 5.03387900  | 10.89766000 |
| H | -3.76165100 | 5.00521300  | 11.06914000 |
| C | -5.24105200 | -0.28673200 | 10.88113500 |
| H | -6.21546700 | -0.75507900 | 11.06914000 |
| H | -5.35304500 | 0.79601300  | 10.89766000 |
| C | -2.37220800 | -4.68225000 | 10.88113500 |
| H | -3.36589000 | -4.23786600 | 10.89766000 |
| H | -2.45381500 | -5.76029200 | 11.06914000 |
| C | 2.86884300  | -4.39551800 | 10.88113500 |
| H | 3.76165100  | -5.00521300 | 11.06914000 |
| H | 1.98715500  | -5.03387900 | 10.89766000 |
| C | -1.49331000 | -4.06506800 | 11.96627700 |
| O | -1.84363800 | -3.19137900 | 12.74833800 |
| C | 4.26710700  | 0.73929000  | 11.96627700 |
| O | 3.68563500  | -0.00094800 | 12.74833800 |

|   |             |             |             |
|---|-------------|-------------|-------------|
| C | 1.49331000  | 4.06506800  | 11.96627700 |
| O | 1.84363800  | 3.19137900  | 12.74833800 |
| C | -2.77379800 | 3.32577800  | 11.96627700 |
| O | -1.84199600 | 3.19232700  | 12.74833800 |
| C | -4.26710700 | -0.73929000 | 11.96627700 |
| O | -3.68563500 | 0.00094800  | 12.74833800 |
| C | 2.77379800  | -3.32577800 | 11.96627700 |
| O | 1.84199600  | -3.19232700 | 12.74833800 |
| O | -0.27627600 | -4.58749000 | 11.94317600 |
| H | 0.37889000  | -4.05445000 | 12.48005300 |
| O | 4.11102100  | 2.05448300  | 11.94317600 |
| H | 3.32181200  | 2.35535300  | 12.48005300 |
| O | 0.27627600  | 4.58749000  | 11.94317600 |
| H | -0.37889000 | 4.05445000  | 12.48005300 |
| O | -3.83474500 | 2.53300700  | 11.94317600 |
| H | -3.70070200 | 1.69909700  | 12.48005300 |
| O | -4.11102100 | -2.05448300 | 11.94317600 |
| H | -3.32181200 | -2.35535300 | 12.48005300 |
| O | 3.83474500  | -2.53300700 | 11.94317600 |
| H | 3.70070200  | -1.69909700 | 12.48005300 |
| C | 1.80037400  | 4.29324200  | 2.55344600  |
| C | 2.62836200  | 4.54434600  | 1.28744500  |
| H | 1.41605300  | 3.26334200  | 2.53725000  |
| H | 0.92330500  | 4.95088900  | 2.56235400  |
| C | 1.82871800  | 4.30674000  | 0.00000000  |
| H | 3.51442500  | 3.89271300  | 1.29180100  |
| H | 3.00866900  | 5.57661700  | 1.29761900  |
| C | -4.61824400 | -0.58745100 | 2.55344600  |
| C | -5.24970000 | 0.00405600  | 1.28744500  |
| H | -3.53416400 | -0.40533300 | 2.53725000  |
| H | -4.74924800 | -1.67583900 | 2.56235400  |
| C | -4.64410500 | -0.56965400 | 0.00000000  |
| H | -5.12840100 | 1.09722500  | 1.29180100  |
| H | -6.33382700 | -0.18272500 | 1.29761900  |
| C | 4.61824400  | 0.58745100  | 2.55344600  |

|   |             |             |             |
|---|-------------|-------------|-------------|
| C | 5.24970000  | -0.00405600 | 1.28744500  |
| H | 3.53416400  | 0.40533300  | 2.53725000  |
| H | 4.74924800  | 1.67583900  | 2.56235400  |
| C | 4.64410500  | 0.56965400  | 0.00000000  |
| H | 5.12840100  | -1.09722500 | 1.29180100  |
| H | 6.33382700  | 0.18272500  | 1.29761900  |
| C | 2.81787000  | -3.70579100 | 2.55344600  |
| C | 2.62133800  | -4.54840200 | 1.28744500  |
| H | 2.11811100  | -2.85800900 | 2.53725000  |
| H | 3.82594300  | -3.27505000 | 2.56235400  |
| C | 2.81538700  | -3.73708600 | 0.00000000  |
| H | 1.61397600  | -4.98993800 | 1.29180100  |
| H | 3.32515800  | -5.39389200 | 1.29761900  |
| C | -2.81787000 | 3.70579100  | 2.55344600  |
| C | -2.62133800 | 4.54840200  | 1.28744500  |
| H | -2.11811100 | 2.85800900  | 2.53725000  |
| H | -3.82594300 | 3.27505000  | 2.56235400  |
| C | -2.81538700 | 3.73708600  | 0.00000000  |
| H | -1.61397600 | 4.98993800  | 1.29180100  |
| H | -3.32515800 | 5.39389200  | 1.29761900  |
| C | -1.80037400 | -4.29324200 | 2.55344600  |
| C | -2.62836200 | -4.54434600 | 1.28744500  |
| H | -1.41605300 | -3.26334200 | 2.53725000  |
| H | -0.92330500 | -4.95088900 | 2.56235400  |
| C | -1.82871800 | -4.30674000 | 0.00000000  |
| H | -3.51442500 | -3.89271300 | 1.29180100  |
| H | -3.00866900 | -5.57661700 | 1.29761900  |
| C | 2.43234200  | 3.74223000  | -8.60348100 |
| O | 3.58626000  | 3.31393800  | -8.71474200 |
| C | 4.45703700  | -0.23535500 | -8.60348100 |
| O | 4.66308500  | -1.44882300 | -8.71474200 |
| C | 2.02469500  | -3.97758500 | -8.60348100 |
| O | 1.07682500  | -4.76276100 | -8.71474200 |
| C | -4.45703700 | 0.23535500  | -8.60348100 |
| O | -4.66308500 | 1.44882300  | -8.71474200 |

|   |             |             |             |
|---|-------------|-------------|-------------|
| C | -2.02469500 | 3.97758500  | -8.60348100 |
| O | -1.07682500 | 4.76276100  | -8.71474200 |
| C | -2.43234200 | -3.74223000 | -8.60348100 |
| O | -3.58626000 | -3.31393800 | -8.71474200 |
| H | 0.82584600  | 4.73614800  | -9.40414000 |
| H | 4.51454800  | 1.65287000  | -9.40414000 |
| H | 3.68870100  | -3.08327800 | -9.40414000 |
| H | -4.51454800 | -1.65287000 | -9.40414000 |
| H | -3.68870100 | 3.08327800  | -9.40414000 |
| H | -0.82584600 | -4.73614800 | -9.40414000 |
| C | 1.58473400  | 3.47040900  | -7.36006700 |
| H | 0.70099100  | 4.10625300  | -7.35256600 |
| H | 1.24351200  | 2.42459200  | -7.43638800 |
| C | 3.79782900  | 0.36278500  | -7.36006700 |
| H | 3.90661500  | 1.44605100  | -7.35256600 |
| H | 2.72151400  | 0.13538300  | -7.43638800 |
| C | 2.21309600  | -3.10762400 | -7.36006700 |
| H | 3.20562400  | -2.66020200 | -7.35256600 |
| H | 1.47800200  | -2.28920900 | -7.43638800 |
| C | -3.79782900 | -0.36278500 | -7.36006700 |
| H | -3.90661500 | -1.44605100 | -7.35256600 |
| H | -2.72151400 | -0.13538300 | -7.43638800 |
| C | -2.21309600 | 3.10762400  | -7.36006700 |
| H | -3.20562400 | 2.66020200  | -7.35256600 |
| H | -1.47800200 | 2.28920900  | -7.43638800 |
| C | -1.58473400 | -3.47040900 | -7.36006700 |
| H | -0.70099100 | -4.10625300 | -7.35256600 |
| H | -1.24351200 | -2.42459200 | -7.43638800 |
| C | 1.72617800  | 4.35562800  | -5.09058400 |
| O | 0.58394900  | 4.83228600  | -5.15087100 |
| C | 4.63517300  | 0.68290000  | -5.09058400 |
| O | 4.47685700  | 1.91042800  | -5.15087100 |
| C | 2.90899500  | -3.67272800 | -5.09058400 |
| O | 3.89290700  | -2.92185800 | -5.15087100 |
| C | -4.63517300 | -0.68290000 | -5.09058400 |

|   |             |             |             |
|---|-------------|-------------|-------------|
| O | -4.47685700 | -1.91042800 | -5.15087100 |
| C | -2.90899500 | 3.67272800  | -5.09058400 |
| O | -3.89290700 | 2.92185800  | -5.15087100 |
| C | -1.72617800 | -4.35562800 | -5.09058400 |
| O | -0.58394900 | -4.83228600 | -5.15087100 |
| C | 2.59338700  | 4.51379400  | -3.84880600 |
| H | 3.45478500  | 3.83976600  | -3.90111400 |
| H | 2.98590500  | 5.54084500  | -3.86532600 |
| C | 5.20575400  | 0.01095800  | -3.84880600 |
| H | 5.05272700  | -1.07204800 | -3.90111400 |
| H | 6.29146400  | 0.18455300  | -3.86532600 |
| C | 2.61236700  | -4.50283600 | -3.84880600 |
| H | 1.59794200  | -4.91181400 | -3.90111400 |
| H | 3.30556000  | -5.35629100 | -3.86532600 |
| C | -5.20575400 | -0.01095800 | -3.84880600 |
| H | -5.05272700 | 1.07204800  | -3.90111400 |
| H | -6.29146400 | -0.18455300 | -3.86532600 |
| C | -2.61236700 | 4.50283600  | -3.84880600 |
| H | -1.59794200 | 4.91181400  | -3.90111400 |
| H | -3.30556000 | 5.35629100  | -3.86532600 |
| C | -2.59338700 | -4.51379400 | -3.84880600 |
| H | -3.45478500 | -3.83976600 | -3.90111400 |
| H | -2.98590500 | -5.54084500 | -3.86532600 |
| N | 2.30364600  | 3.68809200  | -6.12421100 |
| N | 4.34580500  | -0.15097000 | -6.12421100 |
| N | 2.04215800  | -3.83906200 | -6.12421100 |
| N | -4.34580500 | 0.15097000  | -6.12421100 |
| N | -2.04215800 | 3.83906200  | -6.12421100 |
| N | -2.30364600 | -3.68809200 | -6.12421100 |
| H | 4.34488800  | -1.15900600 | -5.96037300 |
| H | 1.16871600  | -4.34228700 | -5.96037300 |
| H | 3.17617300  | 3.18328100  | -5.96037300 |
| H | -4.34488800 | 1.15900600  | -5.96037300 |
| H | -1.16871600 | 4.34228700  | -5.96037300 |
| H | -3.17617300 | -3.18328100 | -5.96037300 |

|   |             |             |              |
|---|-------------|-------------|--------------|
| N | 1.78848400  | 4.44135200  | -9.56942200  |
| N | 4.74056600  | 0.67180300  | -9.56942200  |
| N | 2.95208100  | -3.76954900 | -9.56942200  |
| N | -4.74056600 | -0.67180300 | -9.56942200  |
| N | -2.95208100 | 3.76954900  | -9.56942200  |
| N | -1.78848400 | -4.44135200 | -9.56942200  |
| C | 5.24105200  | 0.28673200  | -10.88113500 |
| H | 6.21546700  | 0.75507900  | -11.06914000 |
| H | 5.35304500  | -0.79601300 | -10.89766000 |
| C | 2.37220800  | 4.68225000  | -10.88113500 |
| H | 2.45381500  | 5.76029200  | -11.06914000 |
| H | 3.36589000  | 4.23786600  | -10.89766000 |
| C | -2.86884300 | 4.39551800  | -10.88113500 |
| H | -1.98715500 | 5.03387900  | -10.89766000 |
| H | -3.76165100 | 5.00521300  | -11.06914000 |
| C | -5.24105200 | -0.28673200 | -10.88113500 |
| H | -6.21546700 | -0.75507900 | -11.06914000 |
| H | -5.35304500 | 0.79601300  | -10.89766000 |
| C | -2.37220800 | -4.68225000 | -10.88113500 |
| H | -3.36589000 | -4.23786600 | -10.89766000 |
| H | -2.45381500 | -5.76029200 | -11.06914000 |
| C | 2.86884300  | -4.39551800 | -10.88113500 |
| H | 3.76165100  | -5.00521300 | -11.06914000 |
| H | 1.98715500  | -5.03387900 | -10.89766000 |
| C | -1.49331000 | -4.06506800 | -11.96627700 |
| O | -1.84363800 | -3.19137900 | -12.74833800 |
| C | 4.26710700  | 0.73929000  | -11.96627700 |
| O | 3.68563500  | -0.00094800 | -12.74833800 |
| C | 1.49331000  | 4.06506800  | -11.96627700 |
| O | 1.84363800  | 3.19137900  | -12.74833800 |
| C | -2.77379800 | 3.32577800  | -11.96627700 |
| O | -1.84199600 | 3.19232700  | -12.74833800 |
| C | -4.26710700 | -0.73929000 | -11.96627700 |
| O | -3.68563500 | 0.00094800  | -12.74833800 |
| C | 2.77379800  | -3.32577800 | -11.96627700 |

|   |             |             |              |
|---|-------------|-------------|--------------|
| O | 1.84199600  | -3.19232700 | -12.74833800 |
| O | -0.27627600 | -4.58749000 | -11.94317600 |
| H | 0.37889000  | -4.05445000 | -12.48005300 |
| O | 4.11102100  | 2.05448300  | -11.94317600 |
| H | 3.32181200  | 2.35535300  | -12.48005300 |
| O | 0.27627600  | 4.58749000  | -11.94317600 |
| H | -0.37889000 | 4.05445000  | -12.48005300 |
| O | -3.83474500 | 2.53300700  | -11.94317600 |
| H | -3.70070200 | 1.69909700  | -12.48005300 |
| O | -4.11102100 | -2.05448300 | -11.94317600 |
| H | -3.32181200 | -2.35535300 | -12.48005300 |
| O | 3.83474500  | -2.53300700 | -11.94317600 |
| H | 3.70070200  | -1.69909700 | -12.48005300 |
| C | 1.80037400  | 4.29324200  | -2.55344600  |
| C | 2.62836200  | 4.54434600  | -1.28744500  |
| H | 1.41605300  | 3.26334200  | -2.53725000  |
| H | 0.92330500  | 4.95088900  | -2.56235400  |
| H | 3.51442500  | 3.89271300  | -1.29180100  |
| H | 3.00866900  | 5.57661700  | -1.29761900  |
| C | -4.61824400 | -0.58745100 | -2.55344600  |
| C | -5.24970000 | 0.00405600  | -1.28744500  |
| H | -3.53416400 | -0.40533300 | -2.53725000  |
| H | -4.74924800 | -1.67583900 | -2.56235400  |
| H | -5.12840100 | 1.09722500  | -1.29180100  |
| H | -6.33382700 | -0.18272500 | -1.29761900  |
| C | 4.61824400  | 0.58745100  | -2.55344600  |
| C | 5.24970000  | -0.00405600 | -1.28744500  |
| H | 3.53416400  | 0.40533300  | -2.53725000  |
| H | 4.74924800  | 1.67583900  | -2.56235400  |
| H | 5.12840100  | -1.09722500 | -1.29180100  |
| H | 6.33382700  | 0.18272500  | -1.29761900  |
| C | 2.81787000  | -3.70579100 | -2.55344600  |
| C | 2.62133800  | -4.54840200 | -1.28744500  |
| H | 2.11811100  | -2.85800900 | -2.53725000  |
| H | 3.82594300  | -3.27505000 | -2.56235400  |



|   |             |             |             |
|---|-------------|-------------|-------------|
| H | 1.61397600  | -4.98993800 | -1.29180100 |
| H | 3.32515800  | -5.39389200 | -1.29761900 |
| C | -2.81787000 | 3.70579100  | -2.55344600 |
| C | -2.62133800 | 4.54840200  | -1.28744500 |
| H | -2.11811100 | 2.85800900  | -2.53725000 |
| H | -3.82594300 | 3.27505000  | -2.56235400 |
| H | -1.61397600 | 4.98993800  | -1.29180100 |
| H | -3.32515800 | 5.39389200  | -1.29761900 |
| C | -1.80037400 | -4.29324200 | -2.55344600 |
| C | -2.62836200 | -4.54434600 | -1.28744500 |
| H | -1.41605300 | -3.26334200 | -2.53725000 |
| H | -0.92330500 | -4.95088900 | -2.56235400 |
| H | -3.51442500 | -3.89271300 | -1.29180100 |
| H | -3.00866900 | -5.57661700 | -1.29761900 |
| H | 4.76641100  | 1.66313800  | 0.00000000  |
| H | 3.55933100  | 0.38590000  | 0.00000000  |
| H | 1.44546600  | 3.27542100  | 0.00000000  |
| H | 0.94288600  | 4.95940100  | 0.00000000  |
| H | -2.11386500 | 2.88952100  | 0.00000000  |
| H | -3.82352500 | 3.29626400  | 0.00000000  |
| H | -3.55933100 | -0.38590000 | 0.00000000  |
| H | -4.76641100 | -1.66313800 | 0.00000000  |
| H | -0.94288600 | -4.95940100 | 0.00000000  |
| H | -1.44546600 | -3.27542100 | 0.00000000  |
| H | 3.82352500  | -3.29626400 | 0.00000000  |
| H | 2.11386500  | -2.88952100 | 0.00000000  |

**[P-(CH<sub>2</sub>)<sub>7</sub>-P]<sub>8</sub>**

|   |             |            |            |
|---|-------------|------------|------------|
| C | -2.47042800 | 5.43797400 | 8.57408900 |
| O | -3.67363900 | 5.17420200 | 8.68040500 |
| C | -5.59208500 | 2.09837200 | 8.57408900 |
| O | -6.25636800 | 1.06105800 | 8.68040500 |
| C | 2.09837200  | 5.59208500 | 8.57408900 |
| O | 1.06105800  | 6.25636800 | 8.68040500 |
| C | 5.43797400  | 2.47042800 | 8.57408900 |
| O | 5.17420200  | 3.67363900 | 8.68040500 |

|   |             |            |            |
|---|-------------|------------|------------|
| H | 3.87050900  | 4.93245300 | 9.36901300 |
| H | -0.75090800 | 6.22463400 | 9.36901300 |
| H | -4.93245300 | 3.87050900 | 9.36901300 |
| H | 6.22463400  | 0.75090800 | 9.36901300 |
| C | 2.39423100  | 4.76295300 | 7.32384500 |
| H | 1.74707100  | 3.87256600 | 7.38066600 |
| H | 3.42927100  | 4.42441100 | 7.32151400 |
| C | -1.67493900 | 5.06089300 | 7.32384500 |
| H | -1.50295200 | 3.97368300 | 7.38066600 |
| H | -0.70367000 | 5.55339200 | 7.32151400 |
| C | -4.76295300 | 2.39423100 | 7.32384500 |
| H | -3.87256600 | 1.74707100 | 7.38066600 |
| H | -4.42441100 | 3.42927100 | 7.32151400 |
| C | 5.06089300  | 1.67493900 | 7.32384500 |
| H | 3.97368300  | 1.50295200 | 7.38066600 |
| H | 5.55339200  | 0.70367000 | 7.32151400 |
| C | -1.70815700 | 6.03687000 | 5.08432600 |
| O | -0.51543400 | 6.36716000 | 5.14926700 |
| C | -5.47656100 | 3.06086200 | 5.08432600 |
| O | -4.86672900 | 4.13779500 | 5.14926700 |
| C | 3.06086200  | 5.47656100 | 5.08432600 |
| O | 4.13779500  | 4.86672900 | 5.14926700 |
| C | 6.03687000  | 1.70815700 | 5.08432600 |
| O | 6.36716000  | 0.51543400 | 5.14926700 |
| C | 2.68026400  | 6.28418900 | 3.85081000 |
| H | 1.64137500  | 6.62210600 | 3.92143400 |
| H | 3.31649300  | 7.18065500 | 3.85156500 |
| C | -2.54836000 | 6.33882600 | 3.85081000 |
| H | -3.52190900 | 5.84316300 | 3.92143400 |
| H | -2.73237500 | 7.42260500 | 3.85156500 |
| C | -6.28418900 | 2.68026400 | 3.85081000 |
| H | -6.62210600 | 1.64137500 | 3.92143400 |
| H | -7.18065500 | 3.31649300 | 3.85156500 |
| C | 6.33882600  | 2.54836000 | 3.85081000 |
| H | 5.84316300  | 3.52190900 | 3.92143400 |

|   |             |            |             |
|---|-------------|------------|-------------|
| H | 7.42260500  | 2.73237500 | 3.85156500  |
| N | -2.35872400 | 5.40798200 | 6.09679200  |
| N | -5.49189000 | 2.15615100 | 6.09679200  |
| N | 2.15615100  | 5.49189000 | 6.09679200  |
| N | 5.40798200  | 2.35872400 | 6.09679200  |
| H | -3.30203100 | 5.05082100 | 5.93559900  |
| H | -5.90635800 | 1.23658100 | 5.93559900  |
| H | 1.23658100  | 5.90635800 | 5.93559900  |
| H | 5.05082100  | 3.30203100 | 5.93559900  |
| N | 3.03362700  | 5.49000100 | 9.54677800  |
| N | -1.73691900 | 6.02711500 | 9.54677800  |
| N | -5.49000100 | 3.03362700 | 9.54677800  |
| N | 6.02711500  | 1.73691900 | 9.54677800  |
| C | -2.27417800 | 6.31939100 | 10.86825800 |
| H | -2.21307600 | 7.39504500 | 11.07457500 |
| H | -3.31512200 | 6.00368400 | 10.89292400 |
| C | 2.86039800  | 6.07657100 | 10.86825800 |
| H | 3.66420500  | 6.79396800 | 11.07457500 |
| H | 1.90110000  | 6.58939100 | 10.89292400 |
| C | 6.31939100  | 2.27417800 | 10.86825800 |
| H | 7.39504500  | 2.21307600 | 11.07457500 |
| H | 6.00368400  | 3.31512200 | 10.89292400 |
| C | -6.07657100 | 2.86039800 | 10.86825800 |
| H | -6.79396800 | 3.66420500 | 11.07457500 |
| H | -6.58939100 | 1.90110000 | 10.89292400 |
| C | 2.90730800  | 4.97272500 | 11.92370600 |
| O | 1.98144900  | 4.64084900 | 12.65083500 |
| C | -1.46047000 | 5.57202500 | 11.92370600 |
| O | -1.88048000 | 4.68267200 | 12.65083500 |
| C | 5.57202500  | 1.46047000 | 11.92370600 |
| O | 4.68267200  | 1.88048000 | 12.65083500 |
| C | -4.97272500 | 2.90730800 | 11.92370600 |
| O | -4.64084900 | 1.98144900 | 12.65083500 |
| O | 4.09752300  | 4.38783300 | 11.92781900 |
| H | 4.12116000  | 3.52946000 | 12.43656300 |

|   |             |             |             |
|---|-------------|-------------|-------------|
| O | -0.20528000 | 6.00005300  | 11.92781900 |
| H | 0.41839500  | 5.40980500  | 12.43656300 |
| O | 6.00005300  | 0.20528000  | 11.92781900 |
| H | 5.40980500  | -0.41839500 | 12.43656300 |
| O | -4.38783300 | 4.09752300  | 11.92781900 |
| H | -3.52946000 | 4.12116000  | 12.43656300 |
| C | 2.47042800  | -5.43797400 | 8.57408900  |
| O | 3.67363900  | -5.17420200 | 8.68040500  |
| C | 5.59208500  | -2.09837200 | 8.57408900  |
| O | 6.25636800  | -1.06105800 | 8.68040500  |
| C | -2.09837200 | -5.59208500 | 8.57408900  |
| O | -1.06105800 | -6.25636800 | 8.68040500  |
| C | -5.43797400 | -2.47042800 | 8.57408900  |
| O | -5.17420200 | -3.67363900 | 8.68040500  |
| H | -3.87050900 | -4.93245300 | 9.36901300  |
| H | 0.75090800  | -6.22463400 | 9.36901300  |
| H | 4.93245300  | -3.87050900 | 9.36901300  |
| H | -6.22463400 | -0.75090800 | 9.36901300  |
| C | -2.39423100 | -4.76295300 | 7.32384500  |
| H | -1.74707100 | -3.87256600 | 7.38066600  |
| H | -3.42927100 | -4.42441100 | 7.32151400  |
| C | 1.67493900  | -5.06089300 | 7.32384500  |
| H | 1.50295200  | -3.97368300 | 7.38066600  |
| H | 0.70367000  | -5.55339200 | 7.32151400  |
| C | 4.76295300  | -2.39423100 | 7.32384500  |
| H | 3.87256600  | -1.74707100 | 7.38066600  |
| H | 4.42441100  | -3.42927100 | 7.32151400  |
| C | -5.06089300 | -1.67493900 | 7.32384500  |
| H | -3.97368300 | -1.50295200 | 7.38066600  |
| H | -5.55339200 | -0.70367000 | 7.32151400  |
| C | 1.70815700  | -6.03687000 | 5.08432600  |
| O | 0.51543400  | -6.36716000 | 5.14926700  |
| C | 5.47656100  | -3.06086200 | 5.08432600  |
| O | 4.86672900  | -4.13779500 | 5.14926700  |
| C | -3.06086200 | -5.47656100 | 5.08432600  |

|   |             |             |             |
|---|-------------|-------------|-------------|
| O | -4.13779500 | -4.86672900 | 5.14926700  |
| C | -6.03687000 | -1.70815700 | 5.08432600  |
| O | -6.36716000 | -0.51543400 | 5.14926700  |
| C | -2.68026400 | -6.28418900 | 3.85081000  |
| H | -1.64137500 | -6.62210600 | 3.92143400  |
| H | -3.31649300 | -7.18065500 | 3.85156500  |
| C | 2.54836000  | -6.33882600 | 3.85081000  |
| H | 3.52190900  | -5.84316300 | 3.92143400  |
| H | 2.73237500  | -7.42260500 | 3.85156500  |
| C | 6.28418900  | -2.68026400 | 3.85081000  |
| H | 6.62210600  | -1.64137500 | 3.92143400  |
| H | 7.18065500  | -3.31649300 | 3.85156500  |
| C | -6.33882600 | -2.54836000 | 3.85081000  |
| H | -5.84316300 | -3.52190900 | 3.92143400  |
| H | -7.42260500 | -2.73237500 | 3.85156500  |
| N | 2.35872400  | -5.40798200 | 6.09679200  |
| N | 5.49189000  | -2.15615100 | 6.09679200  |
| N | -2.15615100 | -5.49189000 | 6.09679200  |
| N | -5.40798200 | -2.35872400 | 6.09679200  |
| H | 3.30203100  | -5.05082100 | 5.93559900  |
| H | 5.90635800  | -1.23658100 | 5.93559900  |
| H | -1.23658100 | -5.90635800 | 5.93559900  |
| H | -5.05082100 | -3.30203100 | 5.93559900  |
| N | -3.03362700 | -5.49000100 | 9.54677800  |
| N | 1.73691900  | -6.02711500 | 9.54677800  |
| N | 5.49000100  | -3.03362700 | 9.54677800  |
| N | -6.02711500 | -1.73691900 | 9.54677800  |
| C | 2.27417800  | -6.31939100 | 10.86825800 |
| H | 2.21307600  | -7.39504500 | 11.07457500 |
| H | 3.31512200  | -6.00368400 | 10.89292400 |
| C | -2.86039800 | -6.07657100 | 10.86825800 |
| H | -3.66420500 | -6.79396800 | 11.07457500 |
| H | -1.90110000 | -6.58939100 | 10.89292400 |
| C | -6.31939100 | -2.27417800 | 10.86825800 |
| H | -7.39504500 | -2.21307600 | 11.07457500 |

|   |             |             |             |
|---|-------------|-------------|-------------|
| H | -6.00368400 | -3.31512200 | 10.89292400 |
| C | 6.07657100  | -2.86039800 | 10.86825800 |
| H | 6.79396800  | -3.66420500 | 11.07457500 |
| H | 6.58939100  | -1.90110000 | 10.89292400 |
| C | -2.90730800 | -4.97272500 | 11.92370600 |
| O | -1.98144900 | -4.64084900 | 12.65083500 |
| C | 1.46047000  | -5.57202500 | 11.92370600 |
| O | 1.88048000  | -4.68267200 | 12.65083500 |
| C | -5.57202500 | -1.46047000 | 11.92370600 |
| O | -4.68267200 | -1.88048000 | 12.65083500 |
| C | 4.97272500  | -2.90730800 | 11.92370600 |
| O | 4.64084900  | -1.98144900 | 12.65083500 |
| O | -4.09752300 | -4.38783300 | 11.92781900 |
| H | -4.12116000 | -3.52946000 | 12.43656300 |
| O | 0.20528000  | -6.00005300 | 11.92781900 |
| H | -0.41839500 | -5.40980500 | 12.43656300 |
| O | -6.00005300 | -0.20528000 | 11.92781900 |
| H | -5.40980500 | 0.41839500  | 12.43656300 |
| O | 4.38783300  | -4.09752300 | 11.92781900 |
| H | 3.52946000  | -4.12116000 | 12.43656300 |
| C | -1.82571000 | 5.94865200  | 2.55300900  |
| C | -2.59445100 | 6.34795400  | 1.28773800  |
| H | -1.65572700 | 4.86257300  | 2.54751600  |
| H | -0.83480100 | 6.41784800  | 2.54918200  |
| C | -1.86058800 | 5.95216000  | 0.00000000  |
| H | -3.59083600 | 5.88202700  | 1.29901700  |
| H | -2.76590200 | 7.43467400  | 1.29222500  |
| H | -0.86123100 | 6.41261600  | 0.00000000  |
| H | -1.69292100 | 4.86492700  | 0.00000000  |
| C | -5.49730400 | 2.91536000  | 2.55300900  |
| C | -6.32323500 | 2.65412700  | 1.28773800  |
| H | -4.60913400 | 2.26758300  | 2.54751600  |
| H | -5.12839700 | 3.94781000  | 2.54918200  |
| C | -5.52444700 | 2.89317800  | 0.00000000  |
| H | -6.69832600 | 1.62011700  | 1.29901700  |

|   |             |             |            |
|---|-------------|-------------|------------|
| H | -7.21289600 | 3.30132000  | 1.29222500 |
| H | -5.14338700 | 3.92542200  | 0.00000000 |
| H | -4.63709900 | 2.24294700  | 0.00000000 |
| C | -5.94865200 | -1.82571000 | 2.55300900 |
| C | -6.34795400 | -2.59445100 | 1.28773800 |
| H | -4.86257300 | -1.65572700 | 2.54751600 |
| H | -6.41784800 | -0.83480100 | 2.54918200 |
| C | -5.95216000 | -1.86058800 | 0.00000000 |
| H | -5.88202700 | -3.59083600 | 1.29901700 |
| H | -7.43467400 | -2.76590200 | 1.29222500 |
| H | -6.41261600 | -0.86123100 | 0.00000000 |
| H | -4.86492700 | -1.69292100 | 0.00000000 |
| C | 2.91536000  | 5.49730400  | 2.55300900 |
| C | 2.65412700  | 6.32323500  | 1.28773800 |
| H | 2.26758300  | 4.60913400  | 2.54751600 |
| H | 3.94781000  | 5.12839700  | 2.54918200 |
| C | 2.89317800  | 5.52444700  | 0.00000000 |
| H | 1.62011700  | 6.69832600  | 1.29901700 |
| H | 3.30132000  | 7.21289600  | 1.29222500 |
| H | 3.92542200  | 5.14338700  | 0.00000000 |
| H | 2.24294700  | 4.63709900  | 0.00000000 |
| C | 5.49730400  | -2.91536000 | 2.55300900 |
| C | 6.32323500  | -2.65412700 | 1.28773800 |
| H | 4.60913400  | -2.26758300 | 2.54751600 |
| H | 5.12839700  | -3.94781000 | 2.54918200 |
| C | 5.52444700  | -2.89317800 | 0.00000000 |
| H | 6.69832600  | -1.62011700 | 1.29901700 |
| H | 7.21289600  | -3.30132000 | 1.29222500 |
| H | 5.14338700  | -3.92542200 | 0.00000000 |
| H | 4.63709900  | -2.24294700 | 0.00000000 |
| C | 5.94865200  | 1.82571000  | 2.55300900 |
| C | 6.34795400  | 2.59445100  | 1.28773800 |
| H | 4.86257300  | 1.65572700  | 2.54751600 |
| H | 6.41784800  | 0.83480100  | 2.54918200 |
| C | 5.95216000  | 1.86058800  | 0.00000000 |

|   |             |             |             |
|---|-------------|-------------|-------------|
| H | 5.88202700  | 3.59083600  | 1.29901700  |
| H | 7.43467400  | 2.76590200  | 1.29222500  |
| H | 6.41261600  | 0.86123100  | 0.00000000  |
| H | 4.86492700  | 1.69292100  | 0.00000000  |
| C | 1.82571000  | -5.94865200 | 2.55300900  |
| C | 2.59445100  | -6.34795400 | 1.28773800  |
| H | 1.65572700  | -4.86257300 | 2.54751600  |
| H | 0.83480100  | -6.41784800 | 2.54918200  |
| C | 1.86058800  | -5.95216000 | 0.00000000  |
| H | 3.59083600  | -5.88202700 | 1.29901700  |
| H | 2.76590200  | -7.43467400 | 1.29222500  |
| H | 0.86123100  | -6.41261600 | 0.00000000  |
| H | 1.69292100  | -4.86492700 | 0.00000000  |
| C | -2.91536000 | -5.49730400 | 2.55300900  |
| C | -2.65412700 | -6.32323500 | 1.28773800  |
| H | -2.26758300 | -4.60913400 | 2.54751600  |
| H | -3.94781000 | -5.12839700 | 2.54918200  |
| C | -2.89317800 | -5.52444700 | 0.00000000  |
| H | -1.62011700 | -6.69832600 | 1.29901700  |
| H | -3.30132000 | -7.21289600 | 1.29222500  |
| H | -3.92542200 | -5.14338700 | 0.00000000  |
| H | -2.24294700 | -4.63709900 | 0.00000000  |
| C | -2.47042800 | 5.43797400  | -8.57408900 |
| O | -3.67363900 | 5.17420200  | -8.68040500 |
| C | -5.59208500 | 2.09837200  | -8.57408900 |
| O | -6.25636800 | 1.06105800  | -8.68040500 |
| C | 2.09837200  | 5.59208500  | -8.57408900 |
| O | 1.06105800  | 6.25636800  | -8.68040500 |
| C | 5.43797400  | 2.47042800  | -8.57408900 |
| O | 5.17420200  | 3.67363900  | -8.68040500 |
| H | 3.87050900  | 4.93245300  | -9.36901300 |
| H | -0.75090800 | 6.22463400  | -9.36901300 |
| H | -4.93245300 | 3.87050900  | -9.36901300 |
| H | 6.22463400  | 0.75090800  | -9.36901300 |
| C | 2.39423100  | 4.76295300  | -7.32384500 |



|   |             |            |             |
|---|-------------|------------|-------------|
| H | 1.74707100  | 3.87256600 | -7.38066600 |
| H | 3.42927100  | 4.42441100 | -7.32151400 |
| C | -1.67493900 | 5.06089300 | -7.32384500 |
| H | -1.50295200 | 3.97368300 | -7.38066600 |
| H | -0.70367000 | 5.55339200 | -7.32151400 |
| C | -4.76295300 | 2.39423100 | -7.32384500 |
| H | -3.87256600 | 1.74707100 | -7.38066600 |
| H | -4.42441100 | 3.42927100 | -7.32151400 |
| C | 5.06089300  | 1.67493900 | -7.32384500 |
| H | 3.97368300  | 1.50295200 | -7.38066600 |
| H | 5.55339200  | 0.70367000 | -7.32151400 |
| C | -1.70815700 | 6.03687000 | -5.08432600 |
| O | -0.51543400 | 6.36716000 | -5.14926700 |
| C | -5.47656100 | 3.06086200 | -5.08432600 |
| O | -4.86672900 | 4.13779500 | -5.14926700 |
| C | 3.06086200  | 5.47656100 | -5.08432600 |
| O | 4.13779500  | 4.86672900 | -5.14926700 |
| C | 6.03687000  | 1.70815700 | -5.08432600 |
| O | 6.36716000  | 0.51543400 | -5.14926700 |
| C | 2.68026400  | 6.28418900 | -3.85081000 |
| H | 1.64137500  | 6.62210600 | -3.92143400 |
| H | 3.31649300  | 7.18065500 | -3.85156500 |
| C | -2.54836000 | 6.33882600 | -3.85081000 |
| H | -3.52190900 | 5.84316300 | -3.92143400 |
| H | -2.73237500 | 7.42260500 | -3.85156500 |
| C | -6.28418900 | 2.68026400 | -3.85081000 |
| H | -6.62210600 | 1.64137500 | -3.92143400 |
| H | -7.18065500 | 3.31649300 | -3.85156500 |
| C | 6.33882600  | 2.54836000 | -3.85081000 |
| H | 5.84316300  | 3.52190900 | -3.92143400 |
| H | 7.42260500  | 2.73237500 | -3.85156500 |
| N | -2.35872400 | 5.40798200 | -6.09679200 |
| N | -5.49189000 | 2.15615100 | -6.09679200 |
| N | 2.15615100  | 5.49189000 | -6.09679200 |
| N | 5.40798200  | 2.35872400 | -6.09679200 |

|   |             |             |              |
|---|-------------|-------------|--------------|
| H | -3.30203100 | 5.05082100  | -5.93559900  |
| H | -5.90635800 | 1.23658100  | -5.93559900  |
| H | 1.23658100  | 5.90635800  | -5.93559900  |
| H | 5.05082100  | 3.30203100  | -5.93559900  |
| N | 3.03362700  | 5.49000100  | -9.54677800  |
| N | -1.73691900 | 6.02711500  | -9.54677800  |
| N | -5.49000100 | 3.03362700  | -9.54677800  |
| N | 6.02711500  | 1.73691900  | -9.54677800  |
| C | -2.27417800 | 6.31939100  | -10.86825800 |
| H | -2.21307600 | 7.39504500  | -11.07457500 |
| H | -3.31512200 | 6.00368400  | -10.89292400 |
| C | 2.86039800  | 6.07657100  | -10.86825800 |
| H | 3.66420500  | 6.79396800  | -11.07457500 |
| H | 1.90110000  | 6.58939100  | -10.89292400 |
| C | 6.31939100  | 2.27417800  | -10.86825800 |
| H | 7.39504500  | 2.21307600  | -11.07457500 |
| H | 6.00368400  | 3.31512200  | -10.89292400 |
| C | -6.07657100 | 2.86039800  | -10.86825800 |
| H | -6.79396800 | 3.66420500  | -11.07457500 |
| H | -6.58939100 | 1.90110000  | -10.89292400 |
| C | 2.90730800  | 4.97272500  | -11.92370600 |
| O | 1.98144900  | 4.64084900  | -12.65083500 |
| C | -1.46047000 | 5.57202500  | -11.92370600 |
| O | -1.88048000 | 4.68267200  | -12.65083500 |
| C | 5.57202500  | 1.46047000  | -11.92370600 |
| O | 4.68267200  | 1.88048000  | -12.65083500 |
| C | -4.97272500 | 2.90730800  | -11.92370600 |
| O | -4.64084900 | 1.98144900  | -12.65083500 |
| O | 4.09752300  | 4.38783300  | -11.92781900 |
| H | 4.12116000  | 3.52946000  | -12.43656300 |
| O | -0.20528000 | 6.00005300  | -11.92781900 |
| H | 0.41839500  | 5.40980500  | -12.43656300 |
| O | 6.00005300  | 0.20528000  | -11.92781900 |
| H | 5.40980500  | -0.41839500 | -12.43656300 |
| O | -4.38783300 | 4.09752300  | -11.92781900 |

|   |             |             |              |
|---|-------------|-------------|--------------|
| H | -3.52946000 | 4.12116000  | -12.43656300 |
| C | 2.47042800  | -5.43797400 | -8.57408900  |
| O | 3.67363900  | -5.17420200 | -8.68040500  |
| C | 5.59208500  | -2.09837200 | -8.57408900  |
| O | 6.25636800  | -1.06105800 | -8.68040500  |
| C | -2.09837200 | -5.59208500 | -8.57408900  |
| O | -1.06105800 | -6.25636800 | -8.68040500  |
| C | -5.43797400 | -2.47042800 | -8.57408900  |
| O | -5.17420200 | -3.67363900 | -8.68040500  |
| H | -3.87050900 | -4.93245300 | -9.36901300  |
| H | 0.75090800  | -6.22463400 | -9.36901300  |
| H | 4.93245300  | -3.87050900 | -9.36901300  |
| H | -6.22463400 | -0.75090800 | -9.36901300  |
| C | -2.39423100 | -4.76295300 | -7.32384500  |
| H | -1.74707100 | -3.87256600 | -7.38066600  |
| H | -3.42927100 | -4.42441100 | -7.32151400  |
| C | 1.67493900  | -5.06089300 | -7.32384500  |
| H | 1.50295200  | -3.97368300 | -7.38066600  |
| H | 0.70367000  | -5.55339200 | -7.32151400  |
| C | 4.76295300  | -2.39423100 | -7.32384500  |
| H | 3.87256600  | -1.74707100 | -7.38066600  |
| H | 4.42441100  | -3.42927100 | -7.32151400  |
| C | -5.06089300 | -1.67493900 | -7.32384500  |
| H | -3.97368300 | -1.50295200 | -7.38066600  |
| H | -5.55339200 | -0.70367000 | -7.32151400  |
| C | 1.70815700  | -6.03687000 | -5.08432600  |
| O | 0.51543400  | -6.36716000 | -5.14926700  |
| C | 5.47656100  | -3.06086200 | -5.08432600  |
| O | 4.86672900  | -4.13779500 | -5.14926700  |
| C | -3.06086200 | -5.47656100 | -5.08432600  |
| O | -4.13779500 | -4.86672900 | -5.14926700  |
| C | -6.03687000 | -1.70815700 | -5.08432600  |
| O | -6.36716000 | -0.51543400 | -5.14926700  |
| C | -2.68026400 | -6.28418900 | -3.85081000  |
| H | -1.64137500 | -6.62210600 | -3.92143400  |

|   |             |             |              |
|---|-------------|-------------|--------------|
| H | -3.31649300 | -7.18065500 | -3.85156500  |
| C | 2.54836000  | -6.33882600 | -3.85081000  |
| H | 3.52190900  | -5.84316300 | -3.92143400  |
| H | 2.73237500  | -7.42260500 | -3.85156500  |
| C | 6.28418900  | -2.68026400 | -3.85081000  |
| H | 6.62210600  | -1.64137500 | -3.92143400  |
| H | 7.18065500  | -3.31649300 | -3.85156500  |
| C | -6.33882600 | -2.54836000 | -3.85081000  |
| H | -5.84316300 | -3.52190900 | -3.92143400  |
| H | -7.42260500 | -2.73237500 | -3.85156500  |
| N | 2.35872400  | -5.40798200 | -6.09679200  |
| N | 5.49189000  | -2.15615100 | -6.09679200  |
| N | -2.15615100 | -5.49189000 | -6.09679200  |
| N | -5.40798200 | -2.35872400 | -6.09679200  |
| H | 3.30203100  | -5.05082100 | -5.93559900  |
| H | 5.90635800  | -1.23658100 | -5.93559900  |
| H | -1.23658100 | -5.90635800 | -5.93559900  |
| H | -5.05082100 | -3.30203100 | -5.93559900  |
| N | -3.03362700 | -5.49000100 | -9.54677800  |
| N | 1.73691900  | -6.02711500 | -9.54677800  |
| N | 5.49000100  | -3.03362700 | -9.54677800  |
| N | -6.02711500 | -1.73691900 | -9.54677800  |
| C | 2.27417800  | -6.31939100 | -10.86825800 |
| H | 2.21307600  | -7.39504500 | -11.07457500 |
| H | 3.31512200  | -6.00368400 | -10.89292400 |
| C | -2.86039800 | -6.07657100 | -10.86825800 |
| H | -3.66420500 | -6.79396800 | -11.07457500 |
| H | -1.90110000 | -6.58939100 | -10.89292400 |
| C | -6.31939100 | -2.27417800 | -10.86825800 |
| H | -7.39504500 | -2.21307600 | -11.07457500 |
| H | -6.00368400 | -3.31512200 | -10.89292400 |
| C | 6.07657100  | -2.86039800 | -10.86825800 |
| H | 6.79396800  | -3.66420500 | -11.07457500 |
| H | 6.58939100  | -1.90110000 | -10.89292400 |
| C | -2.90730800 | -4.97272500 | -11.92370600 |

|   |             |             |              |
|---|-------------|-------------|--------------|
| O | -1.98144900 | -4.64084900 | -12.65083500 |
| C | 1.46047000  | -5.57202500 | -11.92370600 |
| O | 1.88048000  | -4.68267200 | -12.65083500 |
| C | -5.57202500 | -1.46047000 | -11.92370600 |
| O | -4.68267200 | -1.88048000 | -12.65083500 |
| C | 4.97272500  | -2.90730800 | -11.92370600 |
| O | 4.64084900  | -1.98144900 | -12.65083500 |
| O | -4.09752300 | -4.38783300 | -11.92781900 |
| H | -4.12116000 | -3.52946000 | -12.43656300 |
| O | 0.20528000  | -6.00005300 | -11.92781900 |
| H | -0.41839500 | -5.40980500 | -12.43656300 |
| O | -6.00005300 | -0.20528000 | -11.92781900 |
| H | -5.40980500 | 0.41839500  | -12.43656300 |
| O | 4.38783300  | -4.09752300 | -11.92781900 |
| H | 3.52946000  | -4.12116000 | -12.43656300 |
| C | -1.82571000 | 5.94865200  | -2.55300900  |
| C | -2.59445100 | 6.34795400  | -1.28773800  |
| H | -1.65572700 | 4.86257300  | -2.54751600  |
| H | -0.83480100 | 6.41784800  | -2.54918200  |
| H | -3.59083600 | 5.88202700  | -1.29901700  |
| H | -2.76590200 | 7.43467400  | -1.29222500  |
| C | -5.49730400 | 2.91536000  | -2.55300900  |
| C | -6.32323500 | 2.65412700  | -1.28773800  |
| H | -4.60913400 | 2.26758300  | -2.54751600  |
| H | -5.12839700 | 3.94781000  | -2.54918200  |
| H | -6.69832600 | 1.62011700  | -1.29901700  |
| H | -7.21289600 | 3.30132000  | -1.29222500  |
| C | -5.94865200 | -1.82571000 | -2.55300900  |
| C | -6.34795400 | -2.59445100 | -1.28773800  |
| H | -4.86257300 | -1.65572700 | -2.54751600  |
| H | -6.41784800 | -0.83480100 | -2.54918200  |
| H | -5.88202700 | -3.59083600 | -1.29901700  |
| H | -7.43467400 | -2.76590200 | -1.29222500  |
| C | 2.91536000  | 5.49730400  | -2.55300900  |
| C | 2.65412700  | 6.32323500  | -1.28773800  |

|   |             |             |             |
|---|-------------|-------------|-------------|
| H | 2.26758300  | 4.60913400  | -2.54751600 |
| H | 3.94781000  | 5.12839700  | -2.54918200 |
| H | 1.62011700  | 6.69832600  | -1.29901700 |
| H | 3.30132000  | 7.21289600  | -1.29222500 |
| C | 5.49730400  | -2.91536000 | -2.55300900 |
| C | 6.32323500  | -2.65412700 | -1.28773800 |
| H | 4.60913400  | -2.26758300 | -2.54751600 |
| H | 5.12839700  | -3.94781000 | -2.54918200 |
| H | 6.69832600  | -1.62011700 | -1.29901700 |
| H | 7.21289600  | -3.30132000 | -1.29222500 |
| C | 5.94865200  | 1.82571000  | -2.55300900 |
| C | 6.34795400  | 2.59445100  | -1.28773800 |
| H | 4.86257300  | 1.65572700  | -2.54751600 |
| H | 6.41784800  | 0.83480100  | -2.54918200 |
| H | 5.88202700  | 3.59083600  | -1.29901700 |
| H | 7.43467400  | 2.76590200  | -1.29222500 |
| C | 1.82571000  | -5.94865200 | -2.55300900 |
| C | 2.59445100  | -6.34795400 | -1.28773800 |
| H | 1.65572700  | -4.86257300 | -2.54751600 |
| H | 0.83480100  | -6.41784800 | -2.54918200 |
| H | 3.59083600  | -5.88202700 | -1.29901700 |
| H | 2.76590200  | -7.43467400 | -1.29222500 |
| C | -2.91536000 | -5.49730400 | -2.55300900 |
| C | -2.65412700 | -6.32323500 | -1.28773800 |
| H | -2.26758300 | -4.60913400 | -2.54751600 |
| H | -3.94781000 | -5.12839700 | -2.54918200 |
| H | -1.62011700 | -6.69832600 | -1.29901700 |
| H | -3.30132000 | -7.21289600 | -1.29222500 |

**[P-(CH<sub>2</sub>)<sub>7</sub>-P]<sub>10</sub>**

|   |             |            |            |
|---|-------------|------------|------------|
| C | -4.72175600 | 5.81473500 | 8.55660100 |
| O | -3.93678800 | 6.76486400 | 8.65662300 |
| C | -0.40216600 | 7.47959800 | 8.55660100 |
| O | 0.79135900  | 7.78687600 | 8.65662300 |
| C | -7.23779600 | 1.92884100 | 8.55660100 |
| O | -7.16121500 | 3.15890400 | 8.65662300 |

|   |             |             |            |
|---|-------------|-------------|------------|
| C | -4.07103800 | -6.28750800 | 8.55660100 |
| O | -5.21723300 | -5.83456600 | 8.65662300 |
| C | -6.98924400 | -2.69380500 | 8.55660100 |
| O | -7.65030200 | -1.65365000 | 8.65662300 |
| H | -7.75361100 | 0.11416600  | 9.36046300 |
| H | -6.20569800 | 4.64982100  | 9.36046300 |
| H | -2.28741900 | 7.40940200  | 9.36046300 |
| H | -2.50457600 | -7.33884300 | 9.36046300 |
| H | -6.33990800 | -4.46509600 | 9.36046300 |
| C | -6.76637900 | 1.20071200  | 7.29783200 |
| H | -5.66499800 | 1.20337300  | 7.33259600 |
| H | -7.09941200 | 0.16374300  | 7.30114900 |
| C | -4.76835500 | 4.94857400  | 7.29783200 |
| H | -3.87575500 | 4.30335200  | 7.33259600 |
| H | -5.64729900 | 4.30540000  | 7.30114900 |
| C | -0.94898100 | 6.80625000  | 7.29783200 |
| H | -0.60610500 | 5.75959600  | 7.33259600 |
| H | -2.03811000 | 6.80254100  | 7.30114900 |
| C | -3.23287100 | -6.06416900 | 7.29783200 |
| H | -2.89505700 | -5.01587100 | 7.33259600 |
| H | -2.34956700 | -6.70134300 | 7.30114900 |
| C | -6.17987700 | -3.00578200 | 7.29783200 |
| H | -5.29040500 | -2.35625300 | 7.33259600 |
| H | -5.83979000 | -4.04045900 | 7.30114900 |
| C | -5.65980600 | 5.45401800  | 5.07923200 |
| O | -6.49808200 | 4.54356200  | 5.14517400 |
| C | -1.37308800 | 7.73914400  | 5.07923200 |
| O | -2.58642000 | 7.49529600  | 5.14517400 |
| C | -7.78467100 | 1.08564300  | 5.07923200 |
| O | -7.92769800 | -0.14365800 | 5.14517400 |
| C | -3.43810300 | -7.06817900 | 5.07923200 |
| O | -2.31316700 | -7.58408100 | 5.14517400 |
| C | -6.93605600 | -3.69741100 | 5.07923200 |
| O | -6.32920200 | -4.77600500 | 5.14517400 |
| C | -8.23103500 | 1.86791300  | 3.85158900 |

|   |             |             |             |
|---|-------------|-------------|-------------|
| H | -7.93297600 | 2.91771900  | 3.93637500  |
| H | -9.32956400 | 1.83647500  | 3.83959900  |
| C | -5.56111500 | 6.34925500  | 3.85158900  |
| H | -4.70292000 | 7.02337000  | 3.93637500  |
| H | -6.46832300 | 6.96952000  | 3.83959900  |
| C | -0.76703900 | 8.40539600  | 3.85158900  |
| H | 0.32349200  | 8.44633300  | 3.93637500  |
| H | -1.13640200 | 9.44044500  | 3.83959900  |
| C | -4.32002100 | -7.25096300 | 3.85158900  |
| H | -5.22634000 | -6.64308300 | 3.93637500  |
| H | -4.62958600 | -8.30544100 | 3.83959900  |
| C | -7.75697900 | -3.32690800 | 3.85158900  |
| H | -8.13290400 | -2.30240200 | 3.93637500  |
| H | -8.62722900 | -3.99804100 | 3.83959900  |
| N | -4.78642800 | 5.73140800  | 6.08061100  |
| N | -0.50346500 | 7.45019800  | 6.08061100  |
| N | -7.24113800 | 1.82341400  | 6.08061100  |
| N | -3.97180500 | -6.32326600 | 6.08061100  |
| N | -6.92998000 | -2.78106100 | 6.08061100  |
| H | -4.04985300 | 6.42124000  | 5.92316100  |
| H | 0.49791000  | 7.57533600  | 5.92316100  |
| H | -7.05071000 | 2.81444800  | 5.92316100  |
| H | -4.85548900 | -5.83591100 | 5.92316100  |
| H | -7.35843500 | -1.86736700 | 5.92316100  |
| N | -6.87360900 | -3.61322000 | 9.54170500  |
| N | -7.68466400 | 1.11705000  | 9.54170500  |
| N | -5.56043800 | 5.42064400  | 9.54170500  |
| N | -1.31231400 | 7.65373700  | 9.54170500  |
| N | -3.43706900 | -6.96336200 | 9.54170500  |
| C | -5.55029600 | 6.01694800  | 10.86998300 |
| H | -6.52832700 | 6.45897600  | 11.09651300 |
| H | -4.78687800 | 6.79108800  | 10.89500300 |
| C | -8.02695700 | 1.60543100  | 10.86998300 |
| H | -9.07801800 | 1.38816700  | 11.09651300 |
| H | -7.86436700 | 2.68044900  | 10.89500300 |



|   |             |             |             |
|---|-------------|-------------|-------------|
| C | -7.43759400 | -3.41930600 | 10.86998300 |
| H | -7.93793500 | -2.45403000 | 10.89500300 |
| H | -8.16021500 | -4.21287400 | 11.09651300 |
| C | -4.00732200 | -7.13798500 | 10.86998300 |
| H | -4.12548700 | -8.20474100 | 11.09651300 |
| H | -4.97948200 | -6.65115300 | 10.89500300 |
| C | -0.95361000 | 8.13019600  | 10.86998300 |
| H | -1.48503700 | 9.06267500  | 11.09651300 |
| H | 0.11903600  | 8.30776200  | 10.89500300 |
| C | -7.14841100 | 0.90466200  | 11.90595000 |
| O | -6.29752300 | 1.43726600  | 12.60305600 |
| C | -5.25143900 | 4.93361700  | 11.90595000 |
| O | -4.25000000 | 4.86436400  | 12.60305600 |
| C | -6.31493200 | -3.46984400 | 11.90595000 |
| O | -5.93960700 | -2.53881900 | 12.60305600 |
| C | -3.06936500 | -6.51898700 | 11.90595000 |
| O | -3.31296300 | -5.54516100 | 12.60305600 |
| C | -1.34859600 | 7.07809800  | 11.90595000 |
| O | -0.57912100 | 6.43344000  | 12.60305600 |
| O | -5.76787800 | -4.68001700 | 11.92386000 |
| H | -4.90816800 | -4.73623100 | 12.42162400 |
| O | -7.41715600 | -0.39594000 | 11.92386000 |
| H | -6.75467900 | -0.94674300 | 12.42162400 |
| O | -6.23333300 | 4.03937300  | 11.92386000 |
| H | -6.02113100 | 3.20437000  | 12.42162400 |
| O | -1.91546600 | -7.17648700 | 11.92386000 |
| H | -1.18690500 | -6.71664100 | 12.42162400 |
| O | -2.66858900 | 6.93178300  | 11.92386000 |
| H | -2.98771600 | 6.13152200  | 12.42162400 |
| C | 4.72175600  | -5.81473500 | 8.55660100  |
| O | 3.93678800  | -6.76486400 | 8.65662300  |
| C | 0.40216600  | -7.47959800 | 8.55660100  |
| O | -0.79135900 | -7.78687600 | 8.65662300  |
| C | 7.23779600  | -1.92884100 | 8.55660100  |
| O | 7.16121500  | -3.15890400 | 8.65662300  |

|   |            |             |            |
|---|------------|-------------|------------|
| C | 4.07103800 | 6.28750800  | 8.55660100 |
| O | 5.21723300 | 5.83456600  | 8.65662300 |
| C | 6.98924400 | 2.69380500  | 8.55660100 |
| O | 7.65030200 | 1.65365000  | 8.65662300 |
| H | 7.75361100 | -0.11416600 | 9.36046300 |
| H | 6.20569800 | -4.64982100 | 9.36046300 |
| H | 2.28741900 | -7.40940200 | 9.36046300 |
| H | 2.50457600 | 7.33884300  | 9.36046300 |
| H | 6.33990800 | 4.46509600  | 9.36046300 |
| C | 6.76637900 | -1.20071200 | 7.29783200 |
| H | 5.66499800 | -1.20337300 | 7.33259600 |
| H | 7.09941200 | -0.16374300 | 7.30114900 |
| C | 4.76835500 | -4.94857400 | 7.29783200 |
| H | 3.87575500 | -4.30335200 | 7.33259600 |
| H | 5.64729900 | -4.30540000 | 7.30114900 |
| C | 0.94898100 | -6.80625000 | 7.29783200 |
| H | 0.60610500 | -5.75959600 | 7.33259600 |
| H | 2.03811000 | -6.80254100 | 7.30114900 |
| C | 3.23287100 | 6.06416900  | 7.29783200 |
| H | 2.89505700 | 5.01587100  | 7.33259600 |
| H | 2.34956700 | 6.70134300  | 7.30114900 |
| C | 6.17987700 | 3.00578200  | 7.29783200 |
| H | 5.29040500 | 2.35625300  | 7.33259600 |
| H | 5.83979000 | 4.04045900  | 7.30114900 |
| C | 5.65980600 | -5.45401800 | 5.07923200 |
| O | 6.49808200 | -4.54356200 | 5.14517400 |
| C | 1.37308800 | -7.73914400 | 5.07923200 |
| O | 2.58642000 | -7.49529600 | 5.14517400 |
| C | 7.78467100 | -1.08564300 | 5.07923200 |
| O | 7.92769800 | 0.14365800  | 5.14517400 |
| C | 3.43810300 | 7.06817900  | 5.07923200 |
| O | 2.31316700 | 7.58408100  | 5.14517400 |
| C | 6.93605600 | 3.69741100  | 5.07923200 |
| O | 6.32920200 | 4.77600500  | 5.14517400 |
| C | 8.23103500 | -1.86791300 | 3.85158900 |

|   |             |             |             |
|---|-------------|-------------|-------------|
| H | 7.93297600  | -2.91771900 | 3.93637500  |
| H | 9.32956400  | -1.83647500 | 3.83959900  |
| C | 5.56111500  | -6.34925500 | 3.85158900  |
| H | 4.70292000  | -7.02337000 | 3.93637500  |
| H | 6.46832300  | -6.96952000 | 3.83959900  |
| C | 0.76703900  | -8.40539600 | 3.85158900  |
| H | -0.32349200 | -8.44633300 | 3.93637500  |
| H | 1.13640200  | -9.44044500 | 3.83959900  |
| C | 4.32002100  | 7.25096300  | 3.85158900  |
| H | 5.22634000  | 6.64308300  | 3.93637500  |
| H | 4.62958600  | 8.30544100  | 3.83959900  |
| C | 7.75697900  | 3.32690800  | 3.85158900  |
| H | 8.13290400  | 2.30240200  | 3.93637500  |
| H | 8.62722900  | 3.99804100  | 3.83959900  |
| N | 4.78642800  | -5.73140800 | 6.08061100  |
| N | 0.50346500  | -7.45019800 | 6.08061100  |
| N | 7.24113800  | -1.82341400 | 6.08061100  |
| N | 3.97180500  | 6.32326600  | 6.08061100  |
| N | 6.92998000  | 2.78106100  | 6.08061100  |
| H | 4.04985300  | -6.42124000 | 5.92316100  |
| H | -0.49791000 | -7.57533600 | 5.92316100  |
| H | 7.05071000  | -2.81444800 | 5.92316100  |
| H | 4.85548900  | 5.83591100  | 5.92316100  |
| H | 7.35843500  | 1.86736700  | 5.92316100  |
| N | 6.87360900  | 3.61322000  | 9.54170500  |
| N | 7.68466400  | -1.11705000 | 9.54170500  |
| N | 5.56043800  | -5.42064400 | 9.54170500  |
| N | 1.31231400  | -7.65373700 | 9.54170500  |
| N | 3.43706900  | 6.96336200  | 9.54170500  |
| C | 5.55029600  | -6.01694800 | 10.86998300 |
| H | 6.52832700  | -6.45897600 | 11.09651300 |
| H | 4.78687800  | -6.79108800 | 10.89500300 |
| C | 8.02695700  | -1.60543100 | 10.86998300 |
| H | 9.07801800  | -1.38816700 | 11.09651300 |
| H | 7.86436700  | -2.68044900 | 10.89500300 |

|   |             |             |             |
|---|-------------|-------------|-------------|
| C | 7.43759400  | 3.41930600  | 10.86998300 |
| H | 7.93793500  | 2.45403000  | 10.89500300 |
| H | 8.16021500  | 4.21287400  | 11.09651300 |
| C | 4.00732200  | 7.13798500  | 10.86998300 |
| H | 4.12548700  | 8.20474100  | 11.09651300 |
| H | 4.97948200  | 6.65115300  | 10.89500300 |
| C | 0.95361000  | -8.13019600 | 10.86998300 |
| H | 1.48503700  | -9.06267500 | 11.09651300 |
| H | -0.11903600 | -8.30776200 | 10.89500300 |
| C | 7.14841100  | -0.90466200 | 11.90595000 |
| O | 6.29752300  | -1.43726600 | 12.60305600 |
| C | 5.25143900  | -4.93361700 | 11.90595000 |
| O | 4.25000000  | -4.86436400 | 12.60305600 |
| C | 6.31493200  | 3.46984400  | 11.90595000 |
| O | 5.93960700  | 2.53881900  | 12.60305600 |
| C | 3.06936500  | 6.51898700  | 11.90595000 |
| O | 3.31296300  | 5.54516100  | 12.60305600 |
| C | 1.34859600  | -7.07809800 | 11.90595000 |
| O | 0.57912100  | -6.43344000 | 12.60305600 |
| O | 5.76787800  | 4.68001700  | 11.92386000 |
| H | 4.90816800  | 4.73623100  | 12.42162400 |
| O | 7.41715600  | 0.39594000  | 11.92386000 |
| H | 6.75467900  | 0.94674300  | 12.42162400 |
| O | 6.23333300  | -4.03937300 | 11.92386000 |
| H | 6.02113100  | -3.20437000 | 12.42162400 |
| O | 1.91546600  | 7.17648700  | 11.92386000 |
| H | 1.18690500  | 6.71664100  | 12.42162400 |
| O | 2.66858900  | -6.93178300 | 11.92386000 |
| H | 2.98771600  | -6.13152200 | 12.42162400 |
| C | -5.49078900 | 5.53105700  | 2.55293100  |
| C | -5.52744900 | 6.39662100  | 1.28773800  |
| H | -6.32666400 | 4.82152400  | 2.54078500  |
| H | -4.57110200 | 4.92886600  | 2.55558000  |
| C | -5.46682900 | 5.56496800  | 0.00000000  |
| H | -6.44493200 | 7.00379800  | 1.28796000  |

|   |             |             |            |
|---|-------------|-------------|------------|
| H | -4.69003400 | 7.10976400  | 1.30349400 |
| H | -4.54464300 | 4.96521400  | 0.00000000 |
| H | -6.29718400 | 4.84298100  | 0.00000000 |
| C | -7.69321500 | 1.24731400  | 2.55293100 |
| C | -8.23164000 | 1.92602200  | 1.28773800 |
| H | -7.95240000 | 0.18197500  | 2.54078500 |
| H | -6.59521400 | 1.30070900  | 2.55558000 |
| H | -9.33078900 | 1.87795600  | 1.28796000 |
| H | -7.97333200 | 2.99518700  | 1.30349400 |
| C | -6.95709400 | -3.51286000 | 2.55293100 |
| C | -7.79162400 | -3.28025200 | 1.28773800 |
| H | -6.54058900 | -4.52708200 | 2.54078500 |
| H | -6.10017800 | -2.82427300 | 2.55558000 |
| C | -6.98194200 | -3.47959300 | 0.00000000 |
| H | -8.65260100 | -3.96520200 | 1.28796000 |
| H | -8.21108700 | -2.26345000 | 1.30349400 |
| H | -6.12657100 | -2.78787700 | 0.00000000 |
| H | -6.55188500 | -4.49241400 | 0.00000000 |
| C | -3.56360000 | -6.93124100 | 2.55293100 |
| C | -4.37547300 | -7.23358100 | 1.28773800 |
| H | -2.63049500 | -7.50694800 | 2.54078500 |
| H | -3.27508100 | -5.87048000 | 2.55558000 |
| C | -3.60325600 | -6.91893300 | 0.00000000 |
| H | -4.66941400 | -8.29378700 | 1.28796000 |
| H | -5.31248700 | -6.65752500 | 1.30349400 |
| H | -3.31782700 | -5.85654700 | 0.00000000 |
| H | -2.66001200 | -7.48554100 | 0.00000000 |
| C | 1.19106800  | -7.70212300 | 2.55293100 |
| C | 0.71196100  | -8.42392800 | 1.28773800 |
| H | 2.28435800  | -7.61941500 | 2.54078500 |
| H | 0.80098500  | -6.67436300 | 2.55558000 |
| C | 1.15175100  | -7.71547500 | 0.00000000 |
| H | 1.09733000  | -9.45442800 | 1.28796000 |
| H | -0.38469700 | -8.50865300 | 1.30349400 |
| H | 0.75821400  | -6.68821600 | 0.00000000 |

|   |             |             |             |
|---|-------------|-------------|-------------|
| H | 2.24789600  | -7.61944600 | 0.00000000  |
| C | 5.49078900  | -5.53105700 | 2.55293100  |
| C | 5.52744900  | -6.39662100 | 1.28773800  |
| H | 6.32666400  | -4.82152400 | 2.54078500  |
| H | 4.57110200  | -4.92886600 | 2.55558000  |
| H | 6.44493200  | -7.00379800 | 1.28796000  |
| H | 4.69003400  | -7.10976400 | 1.30349400  |
| C | 7.69321500  | -1.24731400 | 2.55293100  |
| C | 8.23164000  | -1.92602200 | 1.28773800  |
| H | 7.95240000  | -0.18197500 | 2.54078500  |
| H | 6.59521400  | -1.30070900 | 2.55558000  |
| H | 9.33078900  | -1.87795600 | 1.28796000  |
| H | 7.97333200  | -2.99518700 | 1.30349400  |
| C | 6.95709400  | 3.51286000  | 2.55293100  |
| C | 7.79162400  | 3.28025200  | 1.28773800  |
| H | 6.54058900  | 4.52708200  | 2.54078500  |
| H | 6.10017800  | 2.82427300  | 2.55558000  |
| H | 8.65260100  | 3.96520200  | 1.28796000  |
| H | 8.21108700  | 2.26345000  | 1.30349400  |
| C | 3.56360000  | 6.93124100  | 2.55293100  |
| C | 4.37547300  | 7.23358100  | 1.28773800  |
| H | 2.63049500  | 7.50694800  | 2.54078500  |
| H | 3.27508100  | 5.87048000  | 2.55558000  |
| H | 4.66941400  | 8.29378700  | 1.28796000  |
| H | 5.31248700  | 6.65752500  | 1.30349400  |
| C | -1.19106800 | 7.70212300  | 2.55293100  |
| C | -0.71196100 | 8.42392800  | 1.28773800  |
| H | -2.28435800 | 7.61941500  | 2.54078500  |
| H | -0.80098500 | 6.67436300  | 2.55558000  |
| H | -1.09733000 | 9.45442800  | 1.28796000  |
| H | 0.38469700  | 8.50865300  | 1.30349400  |
| C | -4.72175600 | 5.81473500  | -8.55660100 |
| O | -3.93678800 | 6.76486400  | -8.65662300 |
| C | -0.40216600 | 7.47959800  | -8.55660100 |
| O | 0.79135900  | 7.78687600  | -8.65662300 |

|   |             |             |             |
|---|-------------|-------------|-------------|
| C | -7.23779600 | 1.92884100  | -8.55660100 |
| O | -7.16121500 | 3.15890400  | -8.65662300 |
| C | -4.07103800 | -6.28750800 | -8.55660100 |
| O | -5.21723300 | -5.83456600 | -8.65662300 |
| C | -6.98924400 | -2.69380500 | -8.55660100 |
| O | -7.65030200 | -1.65365000 | -8.65662300 |
| H | -7.75361100 | 0.11416600  | -9.36046300 |
| H | -6.20569800 | 4.64982100  | -9.36046300 |
| H | -2.28741900 | 7.40940200  | -9.36046300 |
| H | -2.50457600 | -7.33884300 | -9.36046300 |
| H | -6.33990800 | -4.46509600 | -9.36046300 |
| C | -6.76637900 | 1.20071200  | -7.29783200 |
| H | -5.66499800 | 1.20337300  | -7.33259600 |
| H | -7.09941200 | 0.16374300  | -7.30114900 |
| C | -4.76835500 | 4.94857400  | -7.29783200 |
| H | -3.87575500 | 4.30335200  | -7.33259600 |
| H | -5.64729900 | 4.30540000  | -7.30114900 |
| C | -0.94898100 | 6.80625000  | -7.29783200 |
| H | -0.60610500 | 5.75959600  | -7.33259600 |
| H | -2.03811000 | 6.80254100  | -7.30114900 |
| C | -3.23287100 | -6.06416900 | -7.29783200 |
| H | -2.89505700 | -5.01587100 | -7.33259600 |
| H | -2.34956700 | -6.70134300 | -7.30114900 |
| C | -6.17987700 | -3.00578200 | -7.29783200 |
| H | -5.29040500 | -2.35625300 | -7.33259600 |
| H | -5.83979000 | -4.04045900 | -7.30114900 |
| C | -5.65980600 | 5.45401800  | -5.07923200 |
| O | -6.49808200 | 4.54356200  | -5.14517400 |
| C | -1.37308800 | 7.73914400  | -5.07923200 |
| O | -2.58642000 | 7.49529600  | -5.14517400 |
| C | -7.78467100 | 1.08564300  | -5.07923200 |
| O | -7.92769800 | -0.14365800 | -5.14517400 |
| C | -3.43810300 | -7.06817900 | -5.07923200 |
| O | -2.31316700 | -7.58408100 | -5.14517400 |
| C | -6.93605600 | -3.69741100 | -5.07923200 |

|   |             |             |              |
|---|-------------|-------------|--------------|
| O | -6.32920200 | -4.77600500 | -5.14517400  |
| C | -8.23103500 | 1.86791300  | -3.85158900  |
| H | -7.93297600 | 2.91771900  | -3.93637500  |
| H | -9.32956400 | 1.83647500  | -3.83959900  |
| C | -5.56111500 | 6.34925500  | -3.85158900  |
| H | -4.70292000 | 7.02337000  | -3.93637500  |
| H | -6.46832300 | 6.96952000  | -3.83959900  |
| C | -0.76703900 | 8.40539600  | -3.85158900  |
| H | 0.32349200  | 8.44633300  | -3.93637500  |
| H | -1.13640200 | 9.44044500  | -3.83959900  |
| C | -4.32002100 | -7.25096300 | -3.85158900  |
| H | -5.22634000 | -6.64308300 | -3.93637500  |
| H | -4.62958600 | -8.30544100 | -3.83959900  |
| C | -7.75697900 | -3.32690800 | -3.85158900  |
| H | -8.13290400 | -2.30240200 | -3.93637500  |
| H | -8.62722900 | -3.99804100 | -3.83959900  |
| N | -4.78642800 | 5.73140800  | -6.08061100  |
| N | -0.50346500 | 7.45019800  | -6.08061100  |
| N | -7.24113800 | 1.82341400  | -6.08061100  |
| N | -3.97180500 | -6.32326600 | -6.08061100  |
| N | -6.92998000 | -2.78106100 | -6.08061100  |
| H | -4.04985300 | 6.42124000  | -5.92316100  |
| H | 0.49791000  | 7.57533600  | -5.92316100  |
| H | -7.05071000 | 2.81444800  | -5.92316100  |
| H | -4.85548900 | -5.83591100 | -5.92316100  |
| H | -7.35843500 | -1.86736700 | -5.92316100  |
| N | -6.87360900 | -3.61322000 | -9.54170500  |
| N | -7.68466400 | 1.11705000  | -9.54170500  |
| N | -5.56043800 | 5.42064400  | -9.54170500  |
| N | -1.31231400 | 7.65373700  | -9.54170500  |
| N | -3.43706900 | -6.96336200 | -9.54170500  |
| C | -5.55029600 | 6.01694800  | -10.86998300 |
| H | -6.52832700 | 6.45897600  | -11.09651300 |
| H | -4.78687800 | 6.79108800  | -10.89500300 |
| C | -8.02695700 | 1.60543100  | -10.86998300 |



|   |             |             |              |
|---|-------------|-------------|--------------|
| H | -9.07801800 | 1.38816700  | -11.09651300 |
| H | -7.86436700 | 2.68044900  | -10.89500300 |
| C | -7.43759400 | -3.41930600 | -10.86998300 |
| H | -7.93793500 | -2.45403000 | -10.89500300 |
| H | -8.16021500 | -4.21287400 | -11.09651300 |
| C | -4.00732200 | -7.13798500 | -10.86998300 |
| H | -4.12548700 | -8.20474100 | -11.09651300 |
| H | -4.97948200 | -6.65115300 | -10.89500300 |
| C | -0.95361000 | 8.13019600  | -10.86998300 |
| H | -1.48503700 | 9.06267500  | -11.09651300 |
| H | 0.11903600  | 8.30776200  | -10.89500300 |
| C | -7.14841100 | 0.90466200  | -11.90595000 |
| O | -6.29752300 | 1.43726600  | -12.60305600 |
| C | -5.25143900 | 4.93361700  | -11.90595000 |
| O | -4.25000000 | 4.86436400  | -12.60305600 |
| C | -6.31493200 | -3.46984400 | -11.90595000 |
| O | -5.93960700 | -2.53881900 | -12.60305600 |
| C | -3.06936500 | -6.51898700 | -11.90595000 |
| O | -3.31296300 | -5.54516100 | -12.60305600 |
| C | -1.34859600 | 7.07809800  | -11.90595000 |
| O | -0.57912100 | 6.43344000  | -12.60305600 |
| O | -5.76787800 | -4.68001700 | -11.92386000 |
| H | -4.90816800 | -4.73623100 | -12.42162400 |
| O | -7.41715600 | -0.39594000 | -11.92386000 |
| H | -6.75467900 | -0.94674300 | -12.42162400 |
| O | -6.23333300 | 4.03937300  | -11.92386000 |
| H | -6.02113100 | 3.20437000  | -12.42162400 |
| O | -1.91546600 | -7.17648700 | -11.92386000 |
| H | -1.18690500 | -6.71664100 | -12.42162400 |
| O | -2.66858900 | 6.93178300  | -11.92386000 |
| H | -2.98771600 | 6.13152200  | -12.42162400 |
| C | 4.72175600  | -5.81473500 | -8.55660100  |
| O | 3.93678800  | -6.76486400 | -8.65662300  |
| C | 0.40216600  | -7.47959800 | -8.55660100  |
| O | -0.79135900 | -7.78687600 | -8.65662300  |

|   |            |             |             |
|---|------------|-------------|-------------|
| C | 7.23779600 | -1.92884100 | -8.55660100 |
| O | 7.16121500 | -3.15890400 | -8.65662300 |
| C | 4.07103800 | 6.28750800  | -8.55660100 |
| O | 5.21723300 | 5.83456600  | -8.65662300 |
| C | 6.98924400 | 2.69380500  | -8.55660100 |
| O | 7.65030200 | 1.65365000  | -8.65662300 |
| H | 7.75361100 | -0.11416600 | -9.36046300 |
| H | 6.20569800 | -4.64982100 | -9.36046300 |
| H | 2.28741900 | -7.40940200 | -9.36046300 |
| H | 2.50457600 | 7.33884300  | -9.36046300 |
| H | 6.33990800 | 4.46509600  | -9.36046300 |
| C | 6.76637900 | -1.20071200 | -7.29783200 |
| H | 5.66499800 | -1.20337300 | -7.33259600 |
| H | 7.09941200 | -0.16374300 | -7.30114900 |
| C | 4.76835500 | -4.94857400 | -7.29783200 |
| H | 3.87575500 | -4.30335200 | -7.33259600 |
| H | 5.64729900 | -4.30540000 | -7.30114900 |
| C | 0.94898100 | -6.80625000 | -7.29783200 |
| H | 0.60610500 | -5.75959600 | -7.33259600 |
| H | 2.03811000 | -6.80254100 | -7.30114900 |
| C | 3.23287100 | 6.06416900  | -7.29783200 |
| H | 2.89505700 | 5.01587100  | -7.33259600 |
| H | 2.34956700 | 6.70134300  | -7.30114900 |
| C | 6.17987700 | 3.00578200  | -7.29783200 |
| H | 5.29040500 | 2.35625300  | -7.33259600 |
| H | 5.83979000 | 4.04045900  | -7.30114900 |
| C | 5.65980600 | -5.45401800 | -5.07923200 |
| O | 6.49808200 | -4.54356200 | -5.14517400 |
| C | 1.37308800 | -7.73914400 | -5.07923200 |
| O | 2.58642000 | -7.49529600 | -5.14517400 |
| C | 7.78467100 | -1.08564300 | -5.07923200 |
| O | 7.92769800 | 0.14365800  | -5.14517400 |
| C | 3.43810300 | 7.06817900  | -5.07923200 |
| O | 2.31316700 | 7.58408100  | -5.14517400 |
| C | 6.93605600 | 3.69741100  | -5.07923200 |

|   |             |             |              |
|---|-------------|-------------|--------------|
| O | 6.32920200  | 4.77600500  | -5.14517400  |
| C | 8.23103500  | -1.86791300 | -3.85158900  |
| H | 7.93297600  | -2.91771900 | -3.93637500  |
| H | 9.32956400  | -1.83647500 | -3.83959900  |
| C | 5.56111500  | -6.34925500 | -3.85158900  |
| H | 4.70292000  | -7.02337000 | -3.93637500  |
| H | 6.46832300  | -6.96952000 | -3.83959900  |
| C | 0.76703900  | -8.40539600 | -3.85158900  |
| H | -0.32349200 | -8.44633300 | -3.93637500  |
| H | 1.13640200  | -9.44044500 | -3.83959900  |
| C | 4.32002100  | 7.25096300  | -3.85158900  |
| H | 5.22634000  | 6.64308300  | -3.93637500  |
| H | 4.62958600  | 8.30544100  | -3.83959900  |
| C | 7.75697900  | 3.32690800  | -3.85158900  |
| H | 8.13290400  | 2.30240200  | -3.93637500  |
| H | 8.62722900  | 3.99804100  | -3.83959900  |
| N | 4.78642800  | -5.73140800 | -6.08061100  |
| N | 0.50346500  | -7.45019800 | -6.08061100  |
| N | 7.24113800  | -1.82341400 | -6.08061100  |
| N | 3.97180500  | 6.32326600  | -6.08061100  |
| N | 6.92998000  | 2.78106100  | -6.08061100  |
| H | 4.04985300  | -6.42124000 | -5.92316100  |
| H | -0.49791000 | -7.57533600 | -5.92316100  |
| H | 7.05071000  | -2.81444800 | -5.92316100  |
| H | 4.85548900  | 5.83591100  | -5.92316100  |
| H | 7.35843500  | 1.86736700  | -5.92316100  |
| N | 6.87360900  | 3.61322000  | -9.54170500  |
| N | 7.68466400  | -1.11705000 | -9.54170500  |
| N | 5.56043800  | -5.42064400 | -9.54170500  |
| N | 1.31231400  | -7.65373700 | -9.54170500  |
| N | 3.43706900  | 6.96336200  | -9.54170500  |
| C | 5.55029600  | -6.01694800 | -10.86998300 |
| H | 6.52832700  | -6.45897600 | -11.09651300 |
| H | 4.78687800  | -6.79108800 | -10.89500300 |
| C | 8.02695700  | -1.60543100 | -10.86998300 |

|   |             |             |              |
|---|-------------|-------------|--------------|
| H | 9.07801800  | -1.38816700 | -11.09651300 |
| H | 7.86436700  | -2.68044900 | -10.89500300 |
| C | 7.43759400  | 3.41930600  | -10.86998300 |
| H | 7.93793500  | 2.45403000  | -10.89500300 |
| H | 8.16021500  | 4.21287400  | -11.09651300 |
| C | 4.00732200  | 7.13798500  | -10.86998300 |
| H | 4.12548700  | 8.20474100  | -11.09651300 |
| H | 4.97948200  | 6.65115300  | -10.89500300 |
| C | 0.95361000  | -8.13019600 | -10.86998300 |
| H | 1.48503700  | -9.06267500 | -11.09651300 |
| H | -0.11903600 | -8.30776200 | -10.89500300 |
| C | 7.14841100  | -0.90466200 | -11.90595000 |
| O | 6.29752300  | -1.43726600 | -12.60305600 |
| C | 5.25143900  | -4.93361700 | -11.90595000 |
| O | 4.25000000  | -4.86436400 | -12.60305600 |
| C | 6.31493200  | 3.46984400  | -11.90595000 |
| O | 5.93960700  | 2.53881900  | -12.60305600 |
| C | 3.06936500  | 6.51898700  | -11.90595000 |
| O | 3.31296300  | 5.54516100  | -12.60305600 |
| C | 1.34859600  | -7.07809800 | -11.90595000 |
| O | 0.57912100  | -6.43344000 | -12.60305600 |
| O | 5.76787800  | 4.68001700  | -11.92386000 |
| H | 4.90816800  | 4.73623100  | -12.42162400 |
| O | 7.41715600  | 0.39594000  | -11.92386000 |
| H | 6.75467900  | 0.94674300  | -12.42162400 |
| O | 6.23333300  | -4.03937300 | -11.92386000 |
| H | 6.02113100  | -3.20437000 | -12.42162400 |
| O | 1.91546600  | 7.17648700  | -11.92386000 |
| H | 1.18690500  | 6.71664100  | -12.42162400 |
| O | 2.66858900  | -6.93178300 | -11.92386000 |
| H | 2.98771600  | -6.13152200 | -12.42162400 |
| C | -5.49078900 | 5.53105700  | -2.55293100  |
| C | -5.52744900 | 6.39662100  | -1.28773800  |
| H | -6.32666400 | 4.82152400  | -2.54078500  |
| H | -4.57110200 | 4.92886600  | -2.55558000  |

|   |             |             |             |
|---|-------------|-------------|-------------|
| H | -6.44493200 | 7.00379800  | -1.28796000 |
| H | -4.69003400 | 7.10976400  | -1.30349400 |
| C | -7.69321500 | 1.24731400  | -2.55293100 |
| C | -8.23164000 | 1.92602200  | -1.28773800 |
| H | -7.95240000 | 0.18197500  | -2.54078500 |
| H | -6.59521400 | 1.30070900  | -2.55558000 |
| H | -9.33078900 | 1.87795600  | -1.28796000 |
| H | -7.97333200 | 2.99518700  | -1.30349400 |
| C | -6.95709400 | -3.51286000 | -2.55293100 |
| C | -7.79162400 | -3.28025200 | -1.28773800 |
| H | -6.54058900 | -4.52708200 | -2.54078500 |
| H | -6.10017800 | -2.82427300 | -2.55558000 |
| H | -8.65260100 | -3.96520200 | -1.28796000 |
| H | -8.21108700 | -2.26345000 | -1.30349400 |
| C | -3.56360000 | -6.93124100 | -2.55293100 |
| C | -4.37547300 | -7.23358100 | -1.28773800 |
| H | -2.63049500 | -7.50694800 | -2.54078500 |
| H | -3.27508100 | -5.87048000 | -2.55558000 |
| H | -4.66941400 | -8.29378700 | -1.28796000 |
| H | -5.31248700 | -6.65752500 | -1.30349400 |
| C | 1.19106800  | -7.70212300 | -2.55293100 |
| C | 0.71196100  | -8.42392800 | -1.28773800 |
| H | 2.28435800  | -7.61941500 | -2.54078500 |
| H | 0.80098500  | -6.67436300 | -2.55558000 |
| H | 1.09733000  | -9.45442800 | -1.28796000 |
| H | -0.38469700 | -8.50865300 | -1.30349400 |
| C | 5.49078900  | -5.53105700 | -2.55293100 |
| C | 5.52744900  | -6.39662100 | -1.28773800 |
| H | 6.32666400  | -4.82152400 | -2.54078500 |
| H | 4.57110200  | -4.92886600 | -2.55558000 |
| C | 5.46682900  | -5.56496800 | 0.00000000  |
| H | 6.44493200  | -7.00379800 | -1.28796000 |
| H | 4.69003400  | -7.10976400 | -1.30349400 |
| H | 4.54464300  | -4.96521400 | 0.00000000  |
| H | 6.29718400  | -4.84298100 | 0.00000000  |

|   |             |             |             |
|---|-------------|-------------|-------------|
| C | 7.69321500  | -1.24731400 | -2.55293100 |
| C | 8.23164000  | -1.92602200 | -1.28773800 |
| H | 7.95240000  | -0.18197500 | -2.54078500 |
| H | 6.59521400  | -1.30070900 | -2.55558000 |
| H | 9.33078900  | -1.87795600 | -1.28796000 |
| H | 7.97333200  | -2.99518700 | -1.30349400 |
| C | 6.95709400  | 3.51286000  | -2.55293100 |
| C | 7.79162400  | 3.28025200  | -1.28773800 |
| H | 6.54058900  | 4.52708200  | -2.54078500 |
| H | 6.10017800  | 2.82427300  | -2.55558000 |
| C | 6.98194200  | 3.47959300  | 0.00000000  |
| H | 8.65260100  | 3.96520200  | -1.28796000 |
| H | 8.21108700  | 2.26345000  | -1.30349400 |
| H | 6.12657100  | 2.78787700  | 0.00000000  |
| H | 6.55188500  | 4.49241400  | 0.00000000  |
| C | 3.56360000  | 6.93124100  | -2.55293100 |
| C | 4.37547300  | 7.23358100  | -1.28773800 |
| H | 2.63049500  | 7.50694800  | -2.54078500 |
| H | 3.27508100  | 5.87048000  | -2.55558000 |
| C | 3.60325600  | 6.91893300  | 0.00000000  |
| H | 4.66941400  | 8.29378700  | -1.28796000 |
| H | 5.31248700  | 6.65752500  | -1.30349400 |
| H | 3.31782700  | 5.85654700  | 0.00000000  |
| H | 2.66001200  | 7.48554100  | 0.00000000  |
| C | -1.19106800 | 7.70212300  | -2.55293100 |
| C | -0.71196100 | 8.42392800  | -1.28773800 |
| H | -2.28435800 | 7.61941500  | -2.54078500 |
| H | -0.80098500 | 6.67436300  | -2.55558000 |
| C | -1.15175100 | 7.71547500  | 0.00000000  |
| H | -1.09733000 | 9.45442800  | -1.28796000 |
| H | 0.38469700  | 8.50865300  | -1.30349400 |
| H | -0.75821400 | 6.68821600  | 0.00000000  |
| H | -2.24789600 | 7.61944600  | 0.00000000  |
| C | 7.69376300  | -1.28883300 | 0.00000000  |
| H | 6.59517300  | -1.34566800 | 0.00000000  |

|   |             |             |            |
|---|-------------|-------------|------------|
| H | 7.94116100  | -0.21666200 | 0.00000000 |
| C | -7.69376300 | 1.28883300  | 0.00000000 |
| H | -7.94116100 | 0.21666200  | 0.00000000 |
| H | -6.59517300 | 1.34566800  | 0.00000000 |

**[P-(CH<sub>2</sub>)<sub>7</sub>-P]<sub>12</sub>**

|   |             |             |             |
|---|-------------|-------------|-------------|
| C | 0.72841500  | 8.97975800  | 8.54209100  |
| O | 1.95421500  | 9.11103900  | 8.63789600  |
| C | -3.85905300 | 8.14090600  | 8.54209100  |
| O | -2.86312000 | 8.86749900  | 8.63789600  |
| H | -5.57900700 | 7.37679100  | 9.35508300  |
| H | -1.14316600 | 9.17799100  | 9.35508300  |
| C | -4.13285300 | 7.33144200  | 7.27496000  |
| H | -3.42508600 | 6.48712200  | 7.28874500  |
| H | -5.14253000 | 6.92296900  | 7.28322900  |
| C | 0.08656500  | 8.41564100  | 7.27496000  |
| H | 0.27735000  | 7.33055500  | 7.28874500  |
| H | -0.99207700 | 8.56673200  | 7.28322900  |
| C | -0.20315400 | 9.43971400  | 5.07475300  |
| O | -1.43881700 | 9.37030000  | 5.14066300  |
| C | -4.89579300 | 8.07345500  | 5.07475300  |
| O | -5.93120200 | 7.39550900  | 5.14066300  |
| C | -4.59064900 | 8.92900000  | 3.85286900  |
| H | -3.60413900 | 9.39401500  | 3.94524000  |
| H | -5.33749600 | 9.73493400  | 3.83697600  |
| C | 0.48888200  | 10.02806600 | 3.85286900  |
| H | 1.57573100  | 9.93752500  | 3.94524000  |
| H | 0.24506000  | 11.09944800 | 3.83697600  |
| N | 0.61742200  | 9.01255900  | 6.06777100  |
| N | -3.97157600 | 8.11381600  | 6.06777100  |
| H | 1.62695100  | 9.00584800  | 5.91360400  |
| H | -3.09394300 | 8.61276900  | 5.91360400  |
| N | -4.75376000 | 7.95050500  | 9.53767900  |
| N | -0.14162500 | 9.26221900  | 9.53767900  |
| C | 0.28825500  | 9.65887100  | 10.87077900 |
| H | -0.09623900 | 10.65709900 | 11.11393600 |

|   |             |             |             |
|---|-------------|-------------|-------------|
| H | 1.37506000  | 9.67218000  | 10.89478900 |
| C | -4.57979900 | 8.50895600  | 10.87077900 |
| H | -5.41189500 | 9.18119900  | 11.11393600 |
| H | -3.64525300 | 9.06388400  | 10.89478900 |
| C | -4.55461600 | 7.37353300  | 11.89399300 |
| O | -3.59778900 | 7.04032300  | 12.57564600 |
| C | -0.25764600 | 8.66297500  | 11.89399300 |
| O | 0.40438500  | 7.89599300  | 12.57564600 |
| O | -5.73689900 | 6.76453000  | 11.91767300 |
| H | -5.75418300 | 5.90551200  | 12.41408500 |
| O | -1.58603500 | 8.72670400  | 11.91767300 |
| H | -2.03051200 | 7.99141500  | 12.41408500 |
| C | -0.00804000 | 9.37715000  | 2.55223100  |
| C | 0.55785400  | 10.03515200 | 1.28808400  |
| H | -1.10346500 | 9.42333300  | 2.53471300  |
| H | 0.25861000  | 8.31069800  | 2.55826300  |
| C | 0.03825600  | 9.38358200  | 0.00000000  |
| H | 0.29902800  | 11.10448900 | 1.28685500  |
| H | 1.65669400  | 9.98746200  | 1.30649000  |
| H | 0.30742000  | 8.31696400  | 0.00000000  |
| H | -1.06155000 | 9.41768700  | 0.00000000  |
| C | -4.69553800 | 8.11683100  | 2.55223100  |
| C | -4.53446000 | 8.96962300  | 1.28808400  |
| H | -5.66729600 | 7.60911300  | 2.53471300  |
| H | -3.93138600 | 7.32658100  | 2.55826300  |
| H | -5.29327800 | 9.76628400  | 1.28685500  |
| H | -3.55899200 | 9.47774300  | 1.30649000  |
| C | 0.72841500  | 8.97975800  | -8.54209100 |
| O | 1.95421500  | 9.11103900  | -8.63789600 |
| C | -3.85905300 | 8.14090600  | -8.54209100 |
| O | -2.86312000 | 8.86749900  | -8.63789600 |
| H | -5.57900700 | 7.37679100  | -9.35508300 |
| H | -1.14316600 | 9.17799100  | -9.35508300 |
| C | -4.13285300 | 7.33144200  | -7.27496000 |
| H | -3.42508600 | 6.48712200  | -7.28874500 |



|   |             |             |              |
|---|-------------|-------------|--------------|
| H | -5.14253000 | 6.92296900  | -7.28322900  |
| C | 0.08656500  | 8.41564100  | -7.27496000  |
| H | 0.27735000  | 7.33055500  | -7.28874500  |
| H | -0.99207700 | 8.56673200  | -7.28322900  |
| C | -0.20315400 | 9.43971400  | -5.07475300  |
| O | -1.43881700 | 9.37030000  | -5.14066300  |
| C | -4.89579300 | 8.07345500  | -5.07475300  |
| O | -5.93120200 | 7.39550900  | -5.14066300  |
| C | -4.59064900 | 8.92900000  | -3.85286900  |
| H | -3.60413900 | 9.39401500  | -3.94524000  |
| H | -5.33749600 | 9.73493400  | -3.83697600  |
| C | 0.48888200  | 10.02806600 | -3.85286900  |
| H | 1.57573100  | 9.93752500  | -3.94524000  |
| H | 0.24506000  | 11.09944800 | -3.83697600  |
| N | 0.61742200  | 9.01255900  | -6.06777100  |
| N | -3.97157600 | 8.11381600  | -6.06777100  |
| H | 1.62695100  | 9.00584800  | -5.91360400  |
| H | -3.09394300 | 8.61276900  | -5.91360400  |
| N | -4.75376000 | 7.95050500  | -9.53767900  |
| N | -0.14162500 | 9.26221900  | -9.53767900  |
| C | 0.28825500  | 9.65887100  | -10.87077900 |
| H | -0.09623900 | 10.65709900 | -11.11393600 |
| H | 1.37506000  | 9.67218000  | -10.89478900 |
| C | -4.57979900 | 8.50895600  | -10.87077900 |
| H | -5.41189500 | 9.18119900  | -11.11393600 |
| H | -3.64525300 | 9.06388400  | -10.89478900 |
| C | -4.55461600 | 7.37353300  | -11.89399300 |
| O | -3.59778900 | 7.04032300  | -12.57564600 |
| C | -0.25764600 | 8.66297500  | -11.89399300 |
| O | 0.40438500  | 7.89599300  | -12.57564600 |
| O | -5.73689900 | 6.76453000  | -11.91767300 |
| H | -5.75418300 | 5.90551200  | -12.41408500 |
| O | -1.58603500 | 8.72670400  | -11.91767300 |
| H | -2.03051200 | 7.99141500  | -12.41408500 |
| C | -0.00804000 | 9.37715000  | -2.55223100  |

|   |              |             |             |
|---|--------------|-------------|-------------|
| C | 0.55785400   | 10.03515200 | -1.28808400 |
| H | -1.10346500  | 9.42333300  | -2.53471300 |
| H | 0.25861000   | 8.31069800  | -2.55826300 |
| H | 0.29902800   | 11.10448900 | -1.28685500 |
| H | 1.65669400   | 9.98746200  | -1.30649000 |
| C | -4.69553800  | 8.11683100  | -2.55223100 |
| C | -4.53446000  | 8.96962300  | -1.28808400 |
| H | -5.66729600  | 7.60911300  | -2.53471300 |
| H | -3.93138600  | 7.32658100  | -2.55826300 |
| H | -5.29327800  | 9.76628400  | -1.28685500 |
| H | -3.55899200  | 9.47774300  | -1.30649000 |
| C | -4.65866000  | 8.14554900  | 0.00000000  |
| H | -5.62817300  | 7.62518100  | 0.00000000  |
| H | -3.89224900  | 7.35641200  | 0.00000000  |
| C | -7.41249100  | 5.12070500  | 8.54209100  |
| O | -6.91328400  | 6.24791900  | 8.63789600  |
| C | -8.97975800  | 0.72841500  | 8.54209100  |
| O | -9.11103900  | 1.95421500  | 8.63789600  |
| H | -9.17799100  | -1.14316600 | 9.35508300  |
| H | -8.51995700  | 3.59898500  | 9.35508300  |
| C | -8.41564100  | 0.08656500  | 7.27496000  |
| H | -7.33055500  | 0.27735000  | 7.28874500  |
| H | -8.56673200  | -0.99207700 | 7.28322900  |
| C | -7.24487600  | 4.28278800  | 7.27496000  |
| H | -6.20977200  | 3.90546900  | 7.28874500  |
| H | -7.91504600  | 3.42420200  | 7.28322900  |
| C | -8.27660900  | 4.54392100  | 5.07475300  |
| O | -8.83432700  | 3.43909800  | 5.14066300  |
| C | -9.43971400  | -0.20315400 | 5.07475300  |
| O | -9.37030000  | -1.43881700 | 5.14066300  |
| C | -10.02806600 | 0.48888200  | 3.85286900  |
| H | -9.93752500  | 1.57573100  | 3.94524000  |
| H | -11.09944800 | 0.24506000  | 3.83697600  |
| C | -8.44011900  | 5.43741700  | 3.85286900  |
| H | -7.81828400  | 6.33338600  | 3.94524000  |

|   |              |             |             |
|---|--------------|-------------|-------------|
| H | -9.48987400  | 5.76195300  | 3.83697600  |
| N | -7.49639400  | 5.04098300  | 6.06777100  |
| N | -9.01255900  | 0.61742200  | 6.06777100  |
| H | -6.98581800  | 5.91190500  | 5.91360400  |
| H | -9.00584800  | 1.62695100  | 5.91360400  |
| N | -9.26221900  | -0.14162500 | 9.53767900  |
| N | -8.09212900  | 4.50845900  | 9.53767900  |
| C | -8.22070000  | 5.07907200  | 10.87077900 |
| H | -9.27743800  | 5.24520400  | 11.11393600 |
| H | -7.68882300  | 6.02692700  | 10.89478900 |
| C | -9.65887100  | 0.28825500  | 10.87077900 |
| H | -10.65709900 | -0.09623900 | 11.11393600 |
| H | -9.67218000  | 1.37506000  | 10.89478900 |
| C | -8.66297500  | -0.25764600 | 11.89399300 |
| O | -7.89599300  | 0.40438500  | 12.57564600 |
| C | -7.63117900  | 4.10835900  | 11.89399300 |
| O | -6.63593800  | 4.29820400  | 12.57564600 |
| O | -8.72670400  | -1.58603500 | 11.91767300 |
| H | -7.99141500  | -2.03051200 | 12.41408500 |
| O | -8.35056500  | 2.98980600  | 11.91767300 |
| H | -7.93602400  | 2.23723200  | 12.41408500 |
| C | -8.12487000  | 4.68161300  | 2.55223100  |
| C | -8.41177000  | 5.50069100  | 1.28808400  |
| H | -8.71257900  | 3.75603800  | 2.53471300  |
| H | -7.06797100  | 4.37931200  | 2.55826300  |
| C | -8.10729300  | 4.72492200  | 0.00000000  |
| H | -9.46725500  | 5.81121100  | 1.28685500  |
| H | -7.82104900  | 6.42847000  | 1.30649000  |
| H | -7.04899200  | 4.42471600  | 0.00000000  |
| H | -8.68673100  | 3.78951400  | 0.00000000  |
| C | -9.37715000  | -0.00804000 | 2.55223100  |
| C | -10.03515200 | 0.55785400  | 1.28808400  |
| H | -9.42333300  | -1.10346500 | 2.53471300  |
| H | -8.31069800  | 0.25861000  | 2.55826300  |
| H | -11.10448900 | 0.29902800  | 1.28685500  |

|   |              |             |              |
|---|--------------|-------------|--------------|
| H | -9.98746200  | 1.65669400  | 1.30649000   |
| C | -7.41249100  | 5.12070500  | -8.54209100  |
| O | -6.91328400  | 6.24791900  | -8.63789600  |
| C | -8.97975800  | 0.72841500  | -8.54209100  |
| O | -9.11103900  | 1.95421500  | -8.63789600  |
| H | -9.17799100  | -1.14316600 | -9.35508300  |
| H | -8.51995700  | 3.59898500  | -9.35508300  |
| C | -8.41564100  | 0.08656500  | -7.27496000  |
| H | -7.33055500  | 0.27735000  | -7.28874500  |
| H | -8.56673200  | -0.99207700 | -7.28322900  |
| C | -7.24487600  | 4.28278800  | -7.27496000  |
| H | -6.20977200  | 3.90546900  | -7.28874500  |
| H | -7.91504600  | 3.42420200  | -7.28322900  |
| C | -8.27660900  | 4.54392100  | -5.07475300  |
| O | -8.83432700  | 3.43909800  | -5.14066300  |
| C | -9.43971400  | -0.20315400 | -5.07475300  |
| O | -9.37030000  | -1.43881700 | -5.14066300  |
| C | -10.02806600 | 0.48888200  | -3.85286900  |
| H | -9.93752500  | 1.57573100  | -3.94524000  |
| H | -11.09944800 | 0.24506000  | -3.83697600  |
| C | -8.44011900  | 5.43741700  | -3.85286900  |
| H | -7.81828400  | 6.33338600  | -3.94524000  |
| H | -9.48987400  | 5.76195300  | -3.83697600  |
| N | -7.49639400  | 5.04098300  | -6.06777100  |
| N | -9.01255900  | 0.61742200  | -6.06777100  |
| H | -6.98581800  | 5.91190500  | -5.91360400  |
| H | -9.00584800  | 1.62695100  | -5.91360400  |
| N | -9.26221900  | -0.14162500 | -9.53767900  |
| N | -8.09212900  | 4.50845900  | -9.53767900  |
| C | -8.22070000  | 5.07907200  | -10.87077900 |
| H | -9.27743800  | 5.24520400  | -11.11393600 |
| H | -7.68882300  | 6.02692700  | -10.89478900 |
| C | -9.65887100  | 0.28825500  | -10.87077900 |
| H | -10.65709900 | -0.09623900 | -11.11393600 |
| H | -9.67218000  | 1.37506000  | -10.89478900 |

|   |              |             |              |
|---|--------------|-------------|--------------|
| C | -8.66297500  | -0.25764600 | -11.89399300 |
| O | -7.89599300  | 0.40438500  | -12.57564600 |
| C | -7.63117900  | 4.10835900  | -11.89399300 |
| O | -6.63593800  | 4.29820400  | -12.57564600 |
| O | -8.72670400  | -1.58603500 | -11.91767300 |
| H | -7.99141500  | -2.03051200 | -12.41408500 |
| O | -8.35056500  | 2.98980600  | -11.91767300 |
| H | -7.93602400  | 2.23723200  | -12.41408500 |
| C | -8.12487000  | 4.68161300  | -2.55223100  |
| C | -8.41177000  | 5.50069100  | -1.28808400  |
| H | -8.71257900  | 3.75603800  | -2.53471300  |
| H | -7.06797100  | 4.37931200  | -2.55826300  |
| H | -9.46725500  | 5.81121100  | -1.28685500  |
| H | -7.82104900  | 6.42847000  | -1.30649000  |
| C | -9.37715000  | -0.00804000 | -2.55223100  |
| C | -10.03515200 | 0.55785400  | -1.28808400  |
| H | -9.42333300  | -1.10346500 | -2.53471300  |
| H | -8.31069800  | 0.25861000  | -2.55826300  |
| H | -11.10448900 | 0.29902800  | -1.28685500  |
| H | -9.98746200  | 1.65669400  | -1.30649000  |
| C | -9.38358200  | 0.03825600  | 0.00000000   |
| H | -9.41768700  | -1.06155000 | 0.00000000   |
| H | -8.31696400  | 0.30742000  | 0.00000000   |
| C | -8.14090600  | -3.85905300 | 8.54209100   |
| O | -8.86749900  | -2.86312000 | 8.63789600   |
| C | -5.12070500  | -7.41249100 | 8.54209100   |
| O | -6.24791900  | -6.91328400 | 8.63789600   |
| H | -3.59898500  | -8.51995700 | 9.35508300   |
| H | -7.37679100  | -5.57900700 | 9.35508300   |
| C | -4.28278800  | -7.24487600 | 7.27496000   |
| H | -3.90546900  | -6.20977200 | 7.28874500   |
| H | -3.42420200  | -7.91504600 | 7.28322900   |
| C | -7.33144200  | -4.13285300 | 7.27496000   |
| H | -6.48712200  | -3.42508600 | 7.28874500   |
| H | -6.92296900  | -5.14253000 | 7.28322900   |

|   |             |             |             |
|---|-------------|-------------|-------------|
| C | -8.07345500 | -4.89579300 | 5.07475300  |
| O | -7.39550900 | -5.93120200 | 5.14066300  |
| C | -4.54392100 | -8.27660900 | 5.07475300  |
| O | -3.43909800 | -8.83432700 | 5.14066300  |
| C | -5.43741700 | -8.44011900 | 3.85286900  |
| H | -6.33338600 | -7.81828400 | 3.94524000  |
| H | -5.76195300 | -9.48987400 | 3.83697600  |
| C | -8.92900000 | -4.59064900 | 3.85286900  |
| H | -9.39401500 | -3.60413900 | 3.94524000  |
| H | -9.73493400 | -5.33749600 | 3.83697600  |
| N | -8.11381600 | -3.97157600 | 6.06777100  |
| N | -5.04098300 | -7.49639400 | 6.06777100  |
| H | -8.61276900 | -3.09394300 | 5.91360400  |
| H | -5.91190500 | -6.98581800 | 5.91360400  |
| N | -4.50845900 | -8.09212900 | 9.53767900  |
| N | -7.95050500 | -4.75376000 | 9.53767900  |
| C | -8.50895600 | -4.57979900 | 10.87077900 |
| H | -9.18119900 | -5.41189500 | 11.11393600 |
| H | -9.06388400 | -3.64525300 | 10.89478900 |
| C | -5.07907200 | -8.22070000 | 10.87077900 |
| H | -5.24520400 | -9.27743800 | 11.11393600 |
| H | -6.02692700 | -7.68882300 | 10.89478900 |
| C | -4.10835900 | -7.63117900 | 11.89399300 |
| O | -4.29820400 | -6.63593800 | 12.57564600 |
| C | -7.37353300 | -4.55461600 | 11.89399300 |
| O | -7.04032300 | -3.59778900 | 12.57564600 |
| O | -2.98980600 | -8.35056500 | 11.91767300 |
| H | -2.23723200 | -7.93602400 | 12.41408500 |
| O | -6.76453000 | -5.73689900 | 11.91767300 |
| H | -5.90551200 | -5.75418300 | 12.41408500 |
| C | -8.11683100 | -4.69553800 | 2.55223100  |
| C | -8.96962300 | -4.53446000 | 1.28808400  |
| H | -7.60911300 | -5.66729600 | 2.53471300  |
| H | -7.32658100 | -3.93138600 | 2.55826300  |
| C | -8.14554900 | -4.65866000 | 0.00000000  |

|   |             |             |             |
|---|-------------|-------------|-------------|
| H | -9.76628400 | -5.29327800 | 1.28685500  |
| H | -9.47774300 | -3.55899200 | 1.30649000  |
| H | -7.35641200 | -3.89224900 | 0.00000000  |
| H | -7.62518100 | -5.62817300 | 0.00000000  |
| C | -4.68161300 | -8.12487000 | 2.55223100  |
| C | -5.50069100 | -8.41177000 | 1.28808400  |
| H | -3.75603800 | -8.71257900 | 2.53471300  |
| H | -4.37931200 | -7.06797100 | 2.55826300  |
| H | -5.81121100 | -9.46725500 | 1.28685500  |
| H | -6.42847000 | -7.82104900 | 1.30649000  |
| C | -8.14090600 | -3.85905300 | -8.54209100 |
| O | -8.86749900 | -2.86312000 | -8.63789600 |
| C | -5.12070500 | -7.41249100 | -8.54209100 |
| O | -6.24791900 | -6.91328400 | -8.63789600 |
| H | -3.59898500 | -8.51995700 | -9.35508300 |
| H | -7.37679100 | -5.57900700 | -9.35508300 |
| C | -4.28278800 | -7.24487600 | -7.27496000 |
| H | -3.90546900 | -6.20977200 | -7.28874500 |
| H | -3.42420200 | -7.91504600 | -7.28322900 |
| C | -7.33144200 | -4.13285300 | -7.27496000 |
| H | -6.48712200 | -3.42508600 | -7.28874500 |
| H | -6.92296900 | -5.14253000 | -7.28322900 |
| C | -8.07345500 | -4.89579300 | -5.07475300 |
| O | -7.39550900 | -5.93120200 | -5.14066300 |
| C | -4.54392100 | -8.27660900 | -5.07475300 |
| O | -3.43909800 | -8.83432700 | -5.14066300 |
| C | -5.43741700 | -8.44011900 | -3.85286900 |
| H | -6.33338600 | -7.81828400 | -3.94524000 |
| H | -5.76195300 | -9.48987400 | -3.83697600 |
| C | -8.92900000 | -4.59064900 | -3.85286900 |
| H | -9.39401500 | -3.60413900 | -3.94524000 |
| H | -9.73493400 | -5.33749600 | -3.83697600 |
| N | -8.11381600 | -3.97157600 | -6.06777100 |
| N | -5.04098300 | -7.49639400 | -6.06777100 |
| H | -8.61276900 | -3.09394300 | -5.91360400 |

|   |             |             |              |
|---|-------------|-------------|--------------|
| H | -5.91190500 | -6.98581800 | -5.91360400  |
| N | -4.50845900 | -8.09212900 | -9.53767900  |
| N | -7.95050500 | -4.75376000 | -9.53767900  |
| C | -8.50895600 | -4.57979900 | -10.87077900 |
| H | -9.18119900 | -5.41189500 | -11.11393600 |
| H | -9.06388400 | -3.64525300 | -10.89478900 |
| C | -5.07907200 | -8.22070000 | -10.87077900 |
| H | -5.24520400 | -9.27743800 | -11.11393600 |
| H | -6.02692700 | -7.68882300 | -10.89478900 |
| C | -4.10835900 | -7.63117900 | -11.89399300 |
| O | -4.29820400 | -6.63593800 | -12.57564600 |
| C | -7.37353300 | -4.55461600 | -11.89399300 |
| O | -7.04032300 | -3.59778900 | -12.57564600 |
| O | -2.98980600 | -8.35056500 | -11.91767300 |
| H | -2.23723200 | -7.93602400 | -12.41408500 |
| O | -6.76453000 | -5.73689900 | -11.91767300 |
| H | -5.90551200 | -5.75418300 | -12.41408500 |
| C | -8.11683100 | -4.69553800 | -2.55223100  |
| C | -8.96962300 | -4.53446000 | -1.28808400  |
| H | -7.60911300 | -5.66729600 | -2.53471300  |
| H | -7.32658100 | -3.93138600 | -2.55826300  |
| H | -9.76628400 | -5.29327800 | -1.28685500  |
| H | -9.47774300 | -3.55899200 | -1.30649000  |
| C | -4.68161300 | -8.12487000 | -2.55223100  |
| C | -5.50069100 | -8.41177000 | -1.28808400  |
| H | -3.75603800 | -8.71257900 | -2.53471300  |
| H | -4.37931200 | -7.06797100 | -2.55826300  |
| H | -5.81121100 | -9.46725500 | -1.28685500  |
| H | -6.42847000 | -7.82104900 | -1.30649000  |
| C | -4.72492200 | -8.10729300 | 0.00000000   |
| H | -3.78951400 | -8.68673100 | 0.00000000   |
| H | -4.42471600 | -7.04899200 | 0.00000000   |
| C | -0.72841500 | -8.97975800 | 8.54209100   |
| O | -1.95421500 | -9.11103900 | 8.63789600   |
| C | 3.85905300  | -8.14090600 | 8.54209100   |



|   |             |              |             |
|---|-------------|--------------|-------------|
| O | 2.86312000  | -8.86749900  | 8.63789600  |
| H | 5.57900700  | -7.37679100  | 9.35508300  |
| H | 1.14316600  | -9.17799100  | 9.35508300  |
| C | 4.13285300  | -7.33144200  | 7.27496000  |
| H | 3.42508600  | -6.48712200  | 7.28874500  |
| H | 5.14253000  | -6.92296900  | 7.28322900  |
| C | -0.08656500 | -8.41564100  | 7.27496000  |
| H | -0.27735000 | -7.33055500  | 7.28874500  |
| H | 0.99207700  | -8.56673200  | 7.28322900  |
| C | 0.20315400  | -9.43971400  | 5.07475300  |
| O | 1.43881700  | -9.37030000  | 5.14066300  |
| C | 4.89579300  | -8.07345500  | 5.07475300  |
| O | 5.93120200  | -7.39550900  | 5.14066300  |
| C | 4.59064900  | -8.92900000  | 3.85286900  |
| H | 3.60413900  | -9.39401500  | 3.94524000  |
| H | 5.33749600  | -9.73493400  | 3.83697600  |
| C | -0.48888200 | -10.02806600 | 3.85286900  |
| H | -1.57573100 | -9.93752500  | 3.94524000  |
| H | -0.24506000 | -11.09944800 | 3.83697600  |
| N | -0.61742200 | -9.01255900  | 6.06777100  |
| N | 3.97157600  | -8.11381600  | 6.06777100  |
| H | -1.62695100 | -9.00584800  | 5.91360400  |
| H | 3.09394300  | -8.61276900  | 5.91360400  |
| N | 4.75376000  | -7.95050500  | 9.53767900  |
| N | 0.14162500  | -9.26221900  | 9.53767900  |
| C | -0.28825500 | -9.65887100  | 10.87077900 |
| H | 0.09623900  | -10.65709900 | 11.11393600 |
| H | -1.37506000 | -9.67218000  | 10.89478900 |
| C | 4.57979900  | -8.50895600  | 10.87077900 |
| H | 5.41189500  | -9.18119900  | 11.11393600 |
| H | 3.64525300  | -9.06388400  | 10.89478900 |
| C | 4.55461600  | -7.37353300  | 11.89399300 |
| O | 3.59778900  | -7.04032300  | 12.57564600 |
| C | 0.25764600  | -8.66297500  | 11.89399300 |
| O | -0.40438500 | -7.89599300  | 12.57564600 |

|   |             |              |             |
|---|-------------|--------------|-------------|
| O | 5.73689900  | -6.76453000  | 11.91767300 |
| H | 5.75418300  | -5.90551200  | 12.41408500 |
| O | 1.58603500  | -8.72670400  | 11.91767300 |
| H | 2.03051200  | -7.99141500  | 12.41408500 |
| C | 0.00804000  | -9.37715000  | 2.55223100  |
| C | -0.55785400 | -10.03515200 | 1.28808400  |
| H | 1.10346500  | -9.42333300  | 2.53471300  |
| H | -0.25861000 | -8.31069800  | 2.55826300  |
| C | -0.03825600 | -9.38358200  | 0.00000000  |
| H | -0.29902800 | -11.10448900 | 1.28685500  |
| H | -1.65669400 | -9.98746200  | 1.30649000  |
| H | -0.30742000 | -8.31696400  | 0.00000000  |
| H | 1.06155000  | -9.41768700  | 0.00000000  |
| C | 4.69553800  | -8.11683100  | 2.55223100  |
| C | 4.53446000  | -8.96962300  | 1.28808400  |
| H | 5.66729600  | -7.60911300  | 2.53471300  |
| H | 3.93138600  | -7.32658100  | 2.55826300  |
| H | 5.29327800  | -9.76628400  | 1.28685500  |
| H | 3.55899200  | -9.47774300  | 1.30649000  |
| C | -0.72841500 | -8.97975800  | -8.54209100 |
| O | -1.95421500 | -9.11103900  | -8.63789600 |
| C | 3.85905300  | -8.14090600  | -8.54209100 |
| O | 2.86312000  | -8.86749900  | -8.63789600 |
| H | 5.57900700  | -7.37679100  | -9.35508300 |
| H | 1.14316600  | -9.17799100  | -9.35508300 |
| C | 4.13285300  | -7.33144200  | -7.27496000 |
| H | 3.42508600  | -6.48712200  | -7.28874500 |
| H | 5.14253000  | -6.92296900  | -7.28322900 |
| C | -0.08656500 | -8.41564100  | -7.27496000 |
| H | -0.27735000 | -7.33055500  | -7.28874500 |
| H | 0.99207700  | -8.56673200  | -7.28322900 |
| C | 0.20315400  | -9.43971400  | -5.07475300 |
| O | 1.43881700  | -9.37030000  | -5.14066300 |
| C | 4.89579300  | -8.07345500  | -5.07475300 |
| O | 5.93120200  | -7.39550900  | -5.14066300 |

|   |             |              |              |
|---|-------------|--------------|--------------|
| C | 4.59064900  | -8.92900000  | -3.85286900  |
| H | 3.60413900  | -9.39401500  | -3.94524000  |
| H | 5.33749600  | -9.73493400  | -3.83697600  |
| C | -0.48888200 | -10.02806600 | -3.85286900  |
| H | -1.57573100 | -9.93752500  | -3.94524000  |
| H | -0.24506000 | -11.09944800 | -3.83697600  |
| N | -0.61742200 | -9.01255900  | -6.06777100  |
| N | 3.97157600  | -8.11381600  | -6.06777100  |
| H | -1.62695100 | -9.00584800  | -5.91360400  |
| H | 3.09394300  | -8.61276900  | -5.91360400  |
| N | 4.75376000  | -7.95050500  | -9.53767900  |
| N | 0.14162500  | -9.26221900  | -9.53767900  |
| C | -0.28825500 | -9.65887100  | -10.87077900 |
| H | 0.09623900  | -10.65709900 | -11.11393600 |
| H | -1.37506000 | -9.67218000  | -10.89478900 |
| C | 4.57979900  | -8.50895600  | -10.87077900 |
| H | 5.41189500  | -9.18119900  | -11.11393600 |
| H | 3.64525300  | -9.06388400  | -10.89478900 |
| C | 4.55461600  | -7.37353300  | -11.89399300 |
| O | 3.59778900  | -7.04032300  | -12.57564600 |
| C | 0.25764600  | -8.66297500  | -11.89399300 |
| O | -0.40438500 | -7.89599300  | -12.57564600 |
| O | 5.73689900  | -6.76453000  | -11.91767300 |
| H | 5.75418300  | -5.90551200  | -12.41408500 |
| O | 1.58603500  | -8.72670400  | -11.91767300 |
| H | 2.03051200  | -7.99141500  | -12.41408500 |
| C | 0.00804000  | -9.37715000  | -2.55223100  |
| C | -0.55785400 | -10.03515200 | -1.28808400  |
| H | 1.10346500  | -9.42333300  | -2.53471300  |
| H | -0.25861000 | -8.31069800  | -2.55826300  |
| H | -0.29902800 | -11.10448900 | -1.28685500  |
| H | -1.65669400 | -9.98746200  | -1.30649000  |
| C | 4.69553800  | -8.11683100  | -2.55223100  |
| C | 4.53446000  | -8.96962300  | -1.28808400  |
| H | 5.66729600  | -7.60911300  | -2.53471300  |

|   |             |             |             |
|---|-------------|-------------|-------------|
| H | 3.93138600  | -7.32658100 | -2.55826300 |
| H | 5.29327800  | -9.76628400 | -1.28685500 |
| H | 3.55899200  | -9.47774300 | -1.30649000 |
| C | 4.65866000  | -8.14554900 | 0.00000000  |
| H | 5.62817300  | -7.62518100 | 0.00000000  |
| H | 3.89224900  | -7.35641200 | 0.00000000  |
| C | 7.41249100  | -5.12070500 | 8.54209100  |
| O | 6.91328400  | -6.24791900 | 8.63789600  |
| C | 8.97975800  | -0.72841500 | 8.54209100  |
| O | 9.11103900  | -1.95421500 | 8.63789600  |
| H | 9.17799100  | 1.14316600  | 9.35508300  |
| H | 8.51995700  | -3.59898500 | 9.35508300  |
| C | 8.41564100  | -0.08656500 | 7.27496000  |
| H | 7.33055500  | -0.27735000 | 7.28874500  |
| H | 8.56673200  | 0.99207700  | 7.28322900  |
| C | 7.24487600  | -4.28278800 | 7.27496000  |
| H | 6.20977200  | -3.90546900 | 7.28874500  |
| H | 7.91504600  | -3.42420200 | 7.28322900  |
| C | 8.27660900  | -4.54392100 | 5.07475300  |
| O | 8.83432700  | -3.43909800 | 5.14066300  |
| C | 9.43971400  | 0.20315400  | 5.07475300  |
| O | 9.37030000  | 1.43881700  | 5.14066300  |
| C | 10.02806600 | -0.48888200 | 3.85286900  |
| H | 9.93752500  | -1.57573100 | 3.94524000  |
| H | 11.09944800 | -0.24506000 | 3.83697600  |
| C | 8.44011900  | -5.43741700 | 3.85286900  |
| H | 7.81828400  | -6.33338600 | 3.94524000  |
| H | 9.48987400  | -5.76195300 | 3.83697600  |
| N | 7.49639400  | -5.04098300 | 6.06777100  |
| N | 9.01255900  | -0.61742200 | 6.06777100  |
| H | 6.98581800  | -5.91190500 | 5.91360400  |
| H | 9.00584800  | -1.62695100 | 5.91360400  |
| N | 9.26221900  | 0.14162500  | 9.53767900  |
| N | 8.09212900  | -4.50845900 | 9.53767900  |
| C | 8.22070000  | -5.07907200 | 10.87077900 |

|   |             |             |             |
|---|-------------|-------------|-------------|
| H | 9.27743800  | -5.24520400 | 11.11393600 |
| H | 7.68882300  | -6.02692700 | 10.89478900 |
| C | 9.65887100  | -0.28825500 | 10.87077900 |
| H | 10.65709900 | 0.09623900  | 11.11393600 |
| H | 9.67218000  | -1.37506000 | 10.89478900 |
| C | 8.66297500  | 0.25764600  | 11.89399300 |
| O | 7.89599300  | -0.40438500 | 12.57564600 |
| C | 7.63117900  | -4.10835900 | 11.89399300 |
| O | 6.63593800  | -4.29820400 | 12.57564600 |
| O | 8.72670400  | 1.58603500  | 11.91767300 |
| H | 7.99141500  | 2.03051200  | 12.41408500 |
| O | 8.35056500  | -2.98980600 | 11.91767300 |
| H | 7.93602400  | -2.23723200 | 12.41408500 |
| C | 8.12487000  | -4.68161300 | 2.55223100  |
| C | 8.41177000  | -5.50069100 | 1.28808400  |
| H | 8.71257900  | -3.75603800 | 2.53471300  |
| H | 7.06797100  | -4.37931200 | 2.55826300  |
| C | 8.10729300  | -4.72492200 | 0.00000000  |
| H | 9.46725500  | -5.81121100 | 1.28685500  |
| H | 7.82104900  | -6.42847000 | 1.30649000  |
| H | 7.04899200  | -4.42471600 | 0.00000000  |
| H | 8.68673100  | -3.78951400 | 0.00000000  |
| C | 9.37715000  | 0.00804000  | 2.55223100  |
| C | 10.03515200 | -0.55785400 | 1.28808400  |
| H | 9.42333300  | 1.10346500  | 2.53471300  |
| H | 8.31069800  | -0.25861000 | 2.55826300  |
| H | 11.10448900 | -0.29902800 | 1.28685500  |
| H | 9.98746200  | -1.65669400 | 1.30649000  |
| C | 7.41249100  | -5.12070500 | -8.54209100 |
| O | 6.91328400  | -6.24791900 | -8.63789600 |
| C | 8.97975800  | -0.72841500 | -8.54209100 |
| O | 9.11103900  | -1.95421500 | -8.63789600 |
| H | 9.17799100  | 1.14316600  | -9.35508300 |
| H | 8.51995700  | -3.59898500 | -9.35508300 |
| C | 8.41564100  | -0.08656500 | -7.27496000 |

|   |             |             |              |
|---|-------------|-------------|--------------|
| H | 7.33055500  | -0.27735000 | -7.28874500  |
| H | 8.56673200  | 0.99207700  | -7.28322900  |
| C | 7.24487600  | -4.28278800 | -7.27496000  |
| H | 6.20977200  | -3.90546900 | -7.28874500  |
| H | 7.91504600  | -3.42420200 | -7.28322900  |
| C | 8.27660900  | -4.54392100 | -5.07475300  |
| O | 8.83432700  | -3.43909800 | -5.14066300  |
| C | 9.43971400  | 0.20315400  | -5.07475300  |
| O | 9.37030000  | 1.43881700  | -5.14066300  |
| C | 10.02806600 | -0.48888200 | -3.85286900  |
| H | 9.93752500  | -1.57573100 | -3.94524000  |
| H | 11.09944800 | -0.24506000 | -3.83697600  |
| C | 8.44011900  | -5.43741700 | -3.85286900  |
| H | 7.81828400  | -6.33338600 | -3.94524000  |
| H | 9.48987400  | -5.76195300 | -3.83697600  |
| N | 7.49639400  | -5.04098300 | -6.06777100  |
| N | 9.01255900  | -0.61742200 | -6.06777100  |
| H | 6.98581800  | -5.91190500 | -5.91360400  |
| H | 9.00584800  | -1.62695100 | -5.91360400  |
| N | 9.26221900  | 0.14162500  | -9.53767900  |
| N | 8.09212900  | -4.50845900 | -9.53767900  |
| C | 8.22070000  | -5.07907200 | -10.87077900 |
| H | 9.27743800  | -5.24520400 | -11.11393600 |
| H | 7.68882300  | -6.02692700 | -10.89478900 |
| C | 9.65887100  | -0.28825500 | -10.87077900 |
| H | 10.65709900 | 0.09623900  | -11.11393600 |
| H | 9.67218000  | -1.37506000 | -10.89478900 |
| C | 8.66297500  | 0.25764600  | -11.89399300 |
| O | 7.89599300  | -0.40438500 | -12.57564600 |
| C | 7.63117900  | -4.10835900 | -11.89399300 |
| O | 6.63593800  | -4.29820400 | -12.57564600 |
| O | 8.72670400  | 1.58603500  | -11.91767300 |
| H | 7.99141500  | 2.03051200  | -12.41408500 |
| O | 8.35056500  | -2.98980600 | -11.91767300 |
| H | 7.93602400  | -2.23723200 | -12.41408500 |

|   |             |             |             |
|---|-------------|-------------|-------------|
| C | 8.12487000  | -4.68161300 | -2.55223100 |
| C | 8.41177000  | -5.50069100 | -1.28808400 |
| H | 8.71257900  | -3.75603800 | -2.53471300 |
| H | 7.06797100  | -4.37931200 | -2.55826300 |
| H | 9.46725500  | -5.81121100 | -1.28685500 |
| H | 7.82104900  | -6.42847000 | -1.30649000 |
| C | 9.37715000  | 0.00804000  | -2.55223100 |
| C | 10.03515200 | -0.55785400 | -1.28808400 |
| H | 9.42333300  | 1.10346500  | -2.53471300 |
| H | 8.31069800  | -0.25861000 | -2.55826300 |
| H | 11.10448900 | -0.29902800 | -1.28685500 |
| H | 9.98746200  | -1.65669400 | -1.30649000 |
| C | 9.38358200  | -0.03825600 | 0.00000000  |
| H | 9.41768700  | 1.06155000  | 0.00000000  |
| H | 8.31696400  | -0.30742000 | 0.00000000  |
| C | 8.14090600  | 3.85905300  | 8.54209100  |
| O | 8.86749900  | 2.86312000  | 8.63789600  |
| C | 5.12070500  | 7.41249100  | 8.54209100  |
| O | 6.24791900  | 6.91328400  | 8.63789600  |
| H | 3.59898500  | 8.51995700  | 9.35508300  |
| H | 7.37679100  | 5.57900700  | 9.35508300  |
| C | 4.28278800  | 7.24487600  | 7.27496000  |
| H | 3.90546900  | 6.20977200  | 7.28874500  |
| H | 3.42420200  | 7.91504600  | 7.28322900  |
| C | 7.33144200  | 4.13285300  | 7.27496000  |
| H | 6.48712200  | 3.42508600  | 7.28874500  |
| H | 6.92296900  | 5.14253000  | 7.28322900  |
| C | 8.07345500  | 4.89579300  | 5.07475300  |
| O | 7.39550900  | 5.93120200  | 5.14066300  |
| C | 4.54392100  | 8.27660900  | 5.07475300  |
| O | 3.43909800  | 8.83432700  | 5.14066300  |
| C | 5.43741700  | 8.44011900  | 3.85286900  |
| H | 6.33338600  | 7.81828400  | 3.94524000  |
| H | 5.76195300  | 9.48987400  | 3.83697600  |
| C | 8.92900000  | 4.59064900  | 3.85286900  |

|   |            |            |             |
|---|------------|------------|-------------|
| H | 9.39401500 | 3.60413900 | 3.94524000  |
| H | 9.73493400 | 5.33749600 | 3.83697600  |
| N | 8.11381600 | 3.97157600 | 6.06777100  |
| N | 5.04098300 | 7.49639400 | 6.06777100  |
| H | 8.61276900 | 3.09394300 | 5.91360400  |
| H | 5.91190500 | 6.98581800 | 5.91360400  |
| N | 4.50845900 | 8.09212900 | 9.53767900  |
| N | 7.95050500 | 4.75376000 | 9.53767900  |
| C | 8.50895600 | 4.57979900 | 10.87077900 |
| H | 9.18119900 | 5.41189500 | 11.11393600 |
| H | 9.06388400 | 3.64525300 | 10.89478900 |
| C | 5.07907200 | 8.22070000 | 10.87077900 |
| H | 5.24520400 | 9.27743800 | 11.11393600 |
| H | 6.02692700 | 7.68882300 | 10.89478900 |
| C | 4.10835900 | 7.63117900 | 11.89399300 |
| O | 4.29820400 | 6.63593800 | 12.57564600 |
| C | 7.37353300 | 4.55461600 | 11.89399300 |
| O | 7.04032300 | 3.59778900 | 12.57564600 |
| O | 2.98980600 | 8.35056500 | 11.91767300 |
| H | 2.23723200 | 7.93602400 | 12.41408500 |
| O | 6.76453000 | 5.73689900 | 11.91767300 |
| H | 5.90551200 | 5.75418300 | 12.41408500 |
| C | 8.11683100 | 4.69553800 | 2.55223100  |
| C | 8.96962300 | 4.53446000 | 1.28808400  |
| H | 7.60911300 | 5.66729600 | 2.53471300  |
| H | 7.32658100 | 3.93138600 | 2.55826300  |
| C | 8.14554900 | 4.65866000 | 0.00000000  |
| H | 9.76628400 | 5.29327800 | 1.28685500  |
| H | 9.47774300 | 3.55899200 | 1.30649000  |
| H | 7.35641200 | 3.89224900 | 0.00000000  |
| H | 7.62518100 | 5.62817300 | 0.00000000  |
| C | 4.68161300 | 8.12487000 | 2.55223100  |
| C | 5.50069100 | 8.41177000 | 1.28808400  |
| H | 3.75603800 | 8.71257900 | 2.53471300  |
| H | 4.37931200 | 7.06797100 | 2.55826300  |



|   |            |            |              |
|---|------------|------------|--------------|
| H | 5.81121100 | 9.46725500 | 1.28685500   |
| H | 6.42847000 | 7.82104900 | 1.30649000   |
| C | 8.14090600 | 3.85905300 | -8.54209100  |
| O | 8.86749900 | 2.86312000 | -8.63789600  |
| C | 5.12070500 | 7.41249100 | -8.54209100  |
| O | 6.24791900 | 6.91328400 | -8.63789600  |
| H | 3.59898500 | 8.51995700 | -9.35508300  |
| H | 7.37679100 | 5.57900700 | -9.35508300  |
| C | 4.28278800 | 7.24487600 | -7.27496000  |
| H | 3.90546900 | 6.20977200 | -7.28874500  |
| H | 3.42420200 | 7.91504600 | -7.28322900  |
| C | 7.33144200 | 4.13285300 | -7.27496000  |
| H | 6.48712200 | 3.42508600 | -7.28874500  |
| H | 6.92296900 | 5.14253000 | -7.28322900  |
| C | 8.07345500 | 4.89579300 | -5.07475300  |
| O | 7.39550900 | 5.93120200 | -5.14066300  |
| C | 4.54392100 | 8.27660900 | -5.07475300  |
| O | 3.43909800 | 8.83432700 | -5.14066300  |
| C | 5.43741700 | 8.44011900 | -3.85286900  |
| H | 6.33338600 | 7.81828400 | -3.94524000  |
| H | 5.76195300 | 9.48987400 | -3.83697600  |
| C | 8.92900000 | 4.59064900 | -3.85286900  |
| H | 9.39401500 | 3.60413900 | -3.94524000  |
| H | 9.73493400 | 5.33749600 | -3.83697600  |
| N | 8.11381600 | 3.97157600 | -6.06777100  |
| N | 5.04098300 | 7.49639400 | -6.06777100  |
| H | 8.61276900 | 3.09394300 | -5.91360400  |
| H | 5.91190500 | 6.98581800 | -5.91360400  |
| N | 4.50845900 | 8.09212900 | -9.53767900  |
| N | 7.95050500 | 4.75376000 | -9.53767900  |
| C | 8.50895600 | 4.57979900 | -10.87077900 |
| H | 9.18119900 | 5.41189500 | -11.11393600 |
| H | 9.06388400 | 3.64525300 | -10.89478900 |
| C | 5.07907200 | 8.22070000 | -10.87077900 |
| H | 5.24520400 | 9.27743800 | -11.11393600 |

|   |            |            |              |
|---|------------|------------|--------------|
| H | 6.02692700 | 7.68882300 | -10.89478900 |
| C | 4.10835900 | 7.63117900 | -11.89399300 |
| O | 4.29820400 | 6.63593800 | -12.57564600 |
| C | 7.37353300 | 4.55461600 | -11.89399300 |
| O | 7.04032300 | 3.59778900 | -12.57564600 |
| O | 2.98980600 | 8.35056500 | -11.91767300 |
| H | 2.23723200 | 7.93602400 | -12.41408500 |
| O | 6.76453000 | 5.73689900 | -11.91767300 |
| H | 5.90551200 | 5.75418300 | -12.41408500 |
| C | 8.11683100 | 4.69553800 | -2.55223100  |
| C | 8.96962300 | 4.53446000 | -1.28808400  |
| H | 7.60911300 | 5.66729600 | -2.53471300  |
| H | 7.32658100 | 3.93138600 | -2.55826300  |
| H | 9.76628400 | 5.29327800 | -1.28685500  |
| H | 9.47774300 | 3.55899200 | -1.30649000  |
| C | 4.68161300 | 8.12487000 | -2.55223100  |
| C | 5.50069100 | 8.41177000 | -1.28808400  |
| H | 3.75603800 | 8.71257900 | -2.53471300  |
| H | 4.37931200 | 7.06797100 | -2.55826300  |
| H | 5.81121100 | 9.46725500 | -1.28685500  |
| H | 6.42847000 | 7.82104900 | -1.30649000  |
| C | 4.72492200 | 8.10729300 | 0.00000000   |
| H | 3.78951400 | 8.68673100 | 0.00000000   |
| H | 4.42471600 | 7.04899200 | 0.00000000   |
