# Supplementary material for: Hydrogen-Bond-Driven Peptide Nanotube Formation: A DFT Study
Source: MDPI journal article supplement (doi:10.3390/molecules28176217), 2023-08-24
Supplement: s1 [file s1]

### Optimized [P-CH<sub>2</sub>-P]<sub>n</sub> Nanotubes, (*n* = 4, 6, 8, 10, 12, 16)

#### [P-CH<sub>2</sub>-P]<sub>4</sub>

|   |             |              |             |
|---|-------------|--------------|-------------|
| C | 0.00000000  | 0.00000000   | 0.00000000  |
| O | 0.00000000  | 0.00000000   | 1.23066777  |
| C | 3.69086554  | 0.00000000   | 2.52950863  |
| O | 4.92059765  | 0.04797557   | 2.53016739  |
| C | 3.84446768  | -9.68335878  | 2.30538414  |
| O | 5.07510274  | -9.69230681  | 2.30472538  |
| C | 0.15360215  | -9.68335878  | -0.22412449 |
| O | 0.15450510  | -9.74028237  | 1.00522577  |
| C | 2.52851344  | 0.12550118   | -3.68941344 |
| O | 1.29787838  | 0.13444921   | -3.68875468 |
| C | 2.68211559  | -9.55785759  | -3.91353792 |
| O | 1.45238348  | -9.60583316  | -3.91419668 |
| C | 6.21937899  | 0.12550118   | -1.15990481 |
| O | 6.21847604  | 0.18242478   | -2.38925506 |
| C | 6.37298113  | -9.55785759  | -1.38402930 |
| O | 6.37298113  | -9.55785759  | -2.61469707 |
| H | -0.11502764 | -10.62096806 | -2.03228759 |
| H | -0.29954359 | 1.01125367   | -1.76305603 |
| H | 1.88964965  | 0.93954572   | 2.83545322  |
| H | 2.07416560  | -10.69267601 | 2.56622166  |
| H | 4.29881552  | 1.13481842   | -3.95025096 |
| H | 4.48333147  | -10.49740332 | -4.21948252 |
| H | 6.48800877  | 1.06311047   | 0.64825829  |
| H | 6.67252472  | -10.56911127 | 0.37902673  |
| C | 0.65262201  | -8.46957546  | -1.00014582 |
| H | 1.74424048  | -8.59151432  | -1.08335472 |
| H | 0.27811210  | -8.46031265  | -2.02367004 |
| C | 0.53667651  | -1.16016033  | -0.83096703 |
| H | 0.16189758  | -1.13393820  | -1.85409872 |
| H | 1.62381956  | -0.99996024  | -0.90764573 |
| C | 2.90589548  | -1.18773117  | 1.98396620  |
| H | 1.88242513  | -1.20414551  | 2.35837816  |
| H | 2.82330281  | -1.02272515  | 0.89797580  |
| C | 3.02184098  | -8.49714630  | 1.81478741  |

|   |             |             |             |
|---|-------------|-------------|-------------|
| H | 2.94372373  | -8.61427924 | 0.72226680  |
| H | 1.99863964  | -8.53051996 | 2.18880684  |
| C | 3.35114014  | -1.06071129 | -3.19881671 |
| H | 4.37434148  | -1.02733763 | -3.57283614 |
| H | 3.42925739  | -0.94357835 | -2.10629610 |
| C | 3.46708564  | -8.37012642 | -3.36799549 |
| H | 3.54967832  | -8.53513244 | -2.28200509 |
| H | 4.49055600  | -8.35371209 | -3.74240745 |
| C | 5.72035912  | -1.08828213 | -0.38388348 |
| H | 6.09486904  | -1.09754494 | 0.63964075  |
| H | 4.62874065  | -0.96634327 | -0.30067457 |
| C | 5.83630462  | -8.39769726 | -0.55306227 |
| H | 4.74916157  | -8.55789735 | -0.47638357 |
| H | 6.21108355  | -8.42391939 | 0.47006942  |
| C | 0.13759887  | -3.52117534 | -1.12919041 |
| O | 0.26239436  | -3.38968352 | -2.34815788 |
| C | 2.74092872  | -6.15137890 | 2.30576157  |
| O | 1.52100419  | -6.26903902 | 2.17658746  |
| C | 2.69984557  | -3.56142228 | 2.36570696  |
| O | 1.47670987  | -3.47664407 | 2.24121835  |
| C | 0.17868203  | -6.11113197 | -1.18913579 |
| O | 0.30668870  | -6.18207847 | -2.41278876 |
| C | 3.67313556  | -5.99643532 | -3.74973625 |
| O | 4.89627126  | -6.08121353 | -3.62524764 |
| C | 3.63205240  | -3.40647869 | -3.68979087 |
| O | 4.85197693  | -3.28881858 | -3.56061676 |
| C | 6.23538225  | -6.03668225 | -0.25483889 |
| O | 6.11058676  | -6.16817407 | 0.96412857  |
| C | 6.19429910  | -3.44672562 | -0.19489350 |
| O | 6.06629244  | -3.37577912 | 1.02875946  |
| C | -0.23840414 | -4.83886484 | -0.44968954 |
| H | 0.12238239  | -4.85707844 | 0.58449657  |
| H | -1.33661871 | -4.85750524 | -0.39697970 |
| C | 3.43010703  | -4.85432555 | 2.73248295  |
| H | 4.46430766  | -4.82958001 | 2.37212717  |
| H | 3.48322740  | -4.87889831 | 3.83056103  |

|   |             |              |             |
|---|-------------|--------------|-------------|
| C | 2.94287409  | -4.70353205  | -4.11651225 |
| H | 1.90867346  | -4.72827760  | -3.75615646 |
| H | 2.88975372  | -4.67895930  | -5.21459032 |
| C | 6.61138526  | -4.71899277  | -0.93433976 |
| H | 6.25059873  | -4.70077916  | -1.96852588 |
| H | 7.70959984  | -4.70035237  | -0.98704960 |
| N | 0.23714757  | -2.46098519  | -0.27557536 |
| N | 3.58677128  | -7.21306050  | 2.16450186  |
| N | 3.51150384  | -2.46806407  | 2.27432634  |
| N | 0.31241501  | -7.20598162  | -0.38539985 |
| N | 2.86147729  | -7.08979353  | -3.65835563 |
| N | 2.78620984  | -2.34479710  | -3.54853115 |
| N | 6.13583356  | -7.09687240  | -1.10845394 |
| N | 6.06056612  | -2.35187597  | -0.99862945 |
| H | 4.51307120  | -2.58786930  | 2.12201941  |
| H | 4.58392544  | -7.05464923  | 2.01863433  |
| H | 0.45968359  | -7.08763084  | 0.61709352  |
| H | 0.38882935  | -2.62085090  | 0.72047859  |
| H | 1.85990992  | -6.96998830  | -3.50604870 |
| H | 1.78905568  | -2.50320836  | -3.40266363 |
| H | 5.98415178  | -6.93700669  | -2.10450789 |
| H | 5.91329754  | -2.47022676  | -2.00112281 |
| N | -0.21982013 | -10.71911980 | -1.02812617 |
| N | -0.40665804 | 1.05948233   | -0.75550659 |
| N | 2.89452589  | 1.02623365   | 2.94345482  |
| N | 3.08136380  | -10.75236848 | 2.67083523  |
| N | 3.29161733  | 1.19451089   | -4.05486453 |
| N | 3.47845524  | -10.58409124 | -4.32748411 |
| N | 6.59280126  | 1.16126220   | -0.35590313 |
| N | 6.77963917  | -10.61733992 | -0.62852271 |
| C | 3.65935250  | -12.04932300 | 2.97658933  |
| H | 3.43462543  | -12.34184472 | 4.01177613  |
| H | 4.74070280  | -11.96919481 | 2.86712851  |
| C | 3.43133482  | 2.32532736   | 3.30929530  |
| H | 3.19820733  | 2.56238320   | 4.35673935  |
| H | 4.51460112  | 2.28466709   | 3.19703879  |

|   |             |              |             |
|---|-------------|--------------|-------------|
| C | -0.53487067 | -12.03536449 | -0.50097288 |
| H | -1.57221784 | -12.31136812 | -0.73637845 |
| H | -0.42455705 | -11.99825299 | 0.58262036  |
| C | -0.76288836 | 2.33928586   | -0.16826692 |
| H | -1.80863595 | 2.59285980   | -0.39141524 |
| H | -0.65065874 | 2.25560891   | 0.91253063  |
| C | 2.94164631  | -11.88318495 | -4.69332459 |
| H | 3.17477379  | -12.12024079 | -5.74076864 |
| H | 1.85838001  | -11.84252468 | -4.58106808 |
| C | 2.71362862  | 2.49146541   | -4.36061863 |
| H | 2.93835569  | 2.78398713   | -5.39580543 |
| H | 1.63227832  | 2.41133722   | -4.25115781 |
| C | 7.13586949  | -11.89714345 | -1.21576238 |
| H | 7.02363987  | -11.81346650 | -2.29655994 |
| H | 8.18161707  | -12.15071740 | -0.99261406 |
| C | 6.90785181  | 2.47750690   | -0.88305642 |
| H | 6.79753819  | 2.44039539   | -1.96664966 |
| H | 7.94519897  | 2.75351053   | -0.64765084 |
| C | 0.38289904  | -13.10559593 | -1.07955657 |
| O | 0.94470667  | -13.96840693 | -0.41999751 |
| C | 3.12316373  | -13.13458055 | 2.05075279  |
| O | 3.81600033  | -13.96690750 | 1.48303975  |
| C | 3.51264743  | -12.99256162 | -3.81828357 |
| O | 2.84696053  | -13.87180103 | -3.29018530 |
| C | 6.25291213  | -13.02154624 | -0.68797422 |
| O | 5.71825420  | -13.87030159 | -1.38714803 |
| C | 5.99008209  | 3.54773834   | -0.30447273 |
| O | 5.42827446  | 4.41054934   | -0.96403178 |
| C | 2.86033369  | 3.43470402   | 2.43425428  |
| O | 3.52602059  | 4.31394343   | 1.90615600  |
| C | 0.12006900  | 3.46368864   | -0.69605508 |
| O | 0.65472693  | 4.31244400   | 0.00311873  |
| C | 3.24981739  | 3.57672296   | -3.43478208 |
| O | 2.55698079  | 4.40904990   | -2.86706905 |
| O | 0.49179808  | -12.99919474 | -2.39768889 |
| H | 1.24585844  | -13.56151838 | -2.73538612 |

|   |            |              |             |
|---|------------|--------------|-------------|
| O | 1.80191277 | -13.07885484 | 1.94192469  |
| H | 1.48658474 | -13.64840642 | 1.18361503  |
| O | 4.83154736 | -12.90007367 | -3.70602502 |
| H | 5.16532800 | -13.49380824 | -2.97464000 |
| O | 6.14166205 | -12.97973376 | 0.63358855  |
| H | 5.40605431 | -13.58069628 | 0.94436115  |
| O | 5.88118305 | 3.44133715   | 1.01365959  |
| H | 5.12712269 | 4.00366078   | 1.35135683  |
| O | 1.54143376 | 3.34221607   | 2.32199573  |
| H | 1.20765313 | 3.93595065   | 1.59061071  |
| O | 0.23131908 | 3.42187617   | -2.01761785 |
| H | 0.96692682 | 4.02283869   | -2.32839045 |
| O | 4.57106835 | 3.52099725   | -3.32595399 |
| H | 4.88639638 | 4.09054883   | -2.56764433 |

**[P-CH<sub>2</sub>-P]<sub>6</sub>**

|   |             |             |            |
|---|-------------|-------------|------------|
| C | 0.21842896  | 4.45383188  | 4.74193300 |
| O | 1.42925016  | 4.67305747  | 4.85315500 |
| C | 3.96634604  | 2.03775091  | 4.74193300 |
| O | 4.76161156  | 1.09876178  | 4.85315500 |
| C | -3.74791707 | 2.41608097  | 4.74193300 |
| O | -3.33236140 | 3.57429569  | 4.85315500 |
| C | -0.21842896 | -4.45383188 | 4.74193300 |
| O | -1.42925016 | -4.67305747 | 4.85315500 |
| C | -3.96634604 | -2.03775091 | 4.74193300 |
| O | -4.76161156 | -1.09876178 | 4.85315500 |
| C | 3.74791707  | -2.41608097 | 4.74193300 |
| O | 3.33236140  | -3.57429569 | 4.85315500 |
| H | -4.74136674 | 0.80529217  | 5.53553700 |
| H | -1.67327990 | 4.50879013  | 5.53553700 |
| H | 3.06808685  | 3.70349796  | 5.53553700 |
| H | 1.67327990  | -4.50879013 | 5.53553700 |
| H | -3.06808685 | -3.70349796 | 5.53553700 |
| H | 4.74136674  | -0.80529217 | 5.53553700 |
| C | -3.44445287 | 1.55837003  | 3.51209500 |
| H | -2.38514018 | 1.26517888  | 3.59223400 |
| H | -4.04483686 | 0.65029103  | 3.52454700 |

|   |             |             |            |
|---|-------------|-------------|------------|
| C | -0.37263840 | 3.76216871  | 3.51209500 |
| H | -0.09689304 | 2.69818143  | 3.59223400 |
| H | -1.45924988 | 3.82807699  | 3.52454700 |
| C | 3.07181447  | 2.20379867  | 3.51209500 |
| H | 2.28824714  | 1.43300254  | 3.59223400 |
| H | 2.58558698  | 3.17778596  | 3.52454700 |
| C | 0.37263840  | -3.76216871 | 3.51209500 |
| H | 0.09689304  | -2.69818143 | 3.59223400 |
| H | 1.45924988  | -3.82807699 | 3.52454700 |
| C | -3.07181447 | -2.20379867 | 3.51209500 |
| H | -2.28824714 | -1.43300254 | 3.59223400 |
| H | -2.58558698 | -3.17778596 | 3.52454700 |
| C | 3.44445287  | -1.55837003 | 3.51209500 |
| H | 2.38514018  | -1.26517888 | 3.59223400 |
| H | 4.04483686  | -0.65029103 | 3.52454700 |
| C | -0.80813858 | 4.61497790  | 1.27854400 |
| O | -2.02598538 | 4.48011183  | 1.42142300 |
| C | 3.59261880  | 3.00735749  | 1.27854400 |
| O | 2.86689797  | 3.99461073  | 1.42142300 |
| C | -4.40075739 | 1.60762040  | 1.27854400 |
| O | -4.89288335 | 0.48550111  | 1.42142300 |
| C | 0.80813858  | -4.61497790 | 1.27854400 |
| O | 2.02598538  | -4.48011183 | 1.42142300 |
| C | -3.59261880 | -3.00735749 | 1.27854400 |
| O | -2.86689797 | -3.99461073 | 1.42142300 |
| C | 4.40075739  | -1.60762040 | 1.27854400 |
| O | 4.89288335  | -0.48550111 | 1.42142300 |
| C | -4.59636104 | 2.42675816  | 0.00000000 |
| H | -3.96815487 | 3.32203171  | 0.00000000 |
| H | -5.64554026 | 2.75102228  | 0.00000000 |
| C | -0.19654630 | 5.19394451  | 0.00000000 |
| H | 0.89288642  | 5.09753878  | 0.00000000 |
| H | -0.44031494 | 6.26469242  | 0.00000000 |
| C | 4.39981474  | 2.76718635  | 0.00000000 |
| H | 4.86104129  | 1.77550707  | 0.00000000 |
| H | 5.20522531  | 3.51367014  | 0.00000000 |

|   |             |             |            |
|---|-------------|-------------|------------|
| C | 0.19654630  | -5.19394451 | 0.00000000 |
| H | -0.89288642 | -5.09753878 | 0.00000000 |
| H | 0.44031494  | -6.26469242 | 0.00000000 |
| C | -4.39981474 | -2.76718635 | 0.00000000 |
| H | -4.86104129 | -1.77550707 | 0.00000000 |
| H | -5.20522531 | -3.51367014 | 0.00000000 |
| C | 4.59636104  | -2.42675816 | 0.00000000 |
| H | 3.96815487  | -3.32203171 | 0.00000000 |
| H | 5.64554026  | -2.75102228 | 0.00000000 |
| N | 0.08849829  | 4.31177190  | 2.25429000 |
| N | 3.77835315  | 2.07924419  | 2.25429000 |
| N | -3.68985486 | 2.23252772  | 2.25429000 |
| N | -0.08849829 | -4.31177190 | 2.25429000 |
| N | -3.77835315 | -2.07924419 | 2.25429000 |
| N | 3.68985486  | -2.23252772 | 2.25429000 |
| H | 1.09180454  | 4.33482937  | 2.05832700 |
| H | 4.29997462  | 1.22188422  | 2.05832700 |
| H | -3.20817009 | 3.11294515  | 2.05832700 |
| H | -1.09180454 | -4.33482937 | 2.05832700 |
| H | -4.29997462 | -1.22188422 | 2.05832700 |
| H | 3.20817009  | -3.11294515 | 2.05832700 |
| N | -3.75980186 | -2.97214025 | 5.70144200 |
| N | -4.45384988 | 1.77001380  | 5.70144200 |
| N | -0.69404803 | 4.74215404  | 5.70144200 |
| N | 3.75980186  | 2.97214025  | 5.70144200 |
| N | 0.69404803  | -4.74215404 | 5.70144200 |
| N | 4.45384988  | -1.77001380 | 5.70144200 |
| C | -0.31666905 | 5.25162097  | 7.01211500 |
| H | -0.79638495 | 6.22096066  | 7.19647300 |
| H | 0.76485838  | 5.37495027  | 7.03070600 |
| C | -4.70637170 | 2.35156704  | 7.01211500 |
| H | -5.78570244 | 2.42079073  | 7.19647300 |
| H | -4.27241429 | 3.34986192  | 7.03070600 |
| C | -4.38970264 | -2.90005393 | 7.01211500 |
| H | -5.03727266 | -2.02508835 | 7.03070600 |
| H | -4.98931749 | -3.80016993 | 7.19647300 |

|   |             |             |             |
|---|-------------|-------------|-------------|
| C | 0.31666905  | -5.25162097 | 7.01211500  |
| H | 0.79638495  | -6.22096066 | 7.19647300  |
| H | -0.76485838 | -5.37495027 | 7.03070600  |
| C | 4.70637170  | -2.35156704 | 7.01211500  |
| H | 4.27241429  | -3.34986192 | 7.03070600  |
| H | 5.78570244  | -2.42079073 | 7.19647300  |
| C | 4.38970264  | 2.90005393  | 7.01211500  |
| H | 4.98931749  | 3.80016993  | 7.19647300  |
| H | 5.03727266  | 2.02508835  | 7.03070600  |
| C | -4.08092487 | 1.47697885  | 8.09656700  |
| O | -3.20508451 | 1.83184736  | 8.87392200  |
| C | -0.76136123 | 4.27267404  | 8.09656700  |
| O | -0.01611591 | 3.69160829  | 8.87392200  |
| C | -3.31956364 | -2.79569519 | 8.09656700  |
| O | -3.18896860 | -1.85976093 | 8.87392200  |
| C | 0.76136123  | -4.27267404 | 8.09656700  |
| O | 0.01611591  | -3.69160829 | 8.87392200  |
| C | 4.08092487  | -1.47697885 | 8.09656700  |
| O | 3.20508451  | -1.83184736 | 8.87392200  |
| C | 3.31956364  | 2.79569519  | 8.09656700  |
| O | 3.18896860  | 1.85976093  | 8.87392200  |
| O | -2.52094843 | -3.85266072 | 8.07523900  |
| H | -1.68711569 | -3.71312982 | 8.61011600  |
| O | -4.59697627 | 0.25687502  | 8.07523900  |
| H | -4.05922259 | -0.39547987 | 8.61011600  |
| O | -2.07602784 | 4.10953574  | 8.07523900  |
| H | -2.37210691 | 3.31764995  | 8.61011600  |
| O | 2.07602784  | -4.10953574 | 8.07523900  |
| H | 2.37210691  | -3.31764995 | 8.61011600  |
| O | 4.59697627  | -0.25687502 | 8.07523900  |
| H | 4.05922259  | 0.39547987  | 8.61011600  |
| O | 2.52094843  | 3.85266072  | 8.07523900  |
| H | 1.68711569  | 3.71312982  | 8.61011600  |
| C | 0.21842896  | 4.45383188  | -4.74193300 |
| O | 1.42925016  | 4.67305747  | -4.85315500 |
| C | 3.96634604  | 2.03775091  | -4.74193300 |



|   |             |             |             |
|---|-------------|-------------|-------------|
| O | 4.76161156  | 1.09876178  | -4.85315500 |
| C | 3.74791707  | -2.41608097 | -4.74193300 |
| O | 3.33236140  | -3.57429569 | -4.85315500 |
| C | -3.96634604 | -2.03775091 | -4.74193300 |
| O | -4.76161156 | -1.09876178 | -4.85315500 |
| C | -3.74791707 | 2.41608097  | -4.74193300 |
| O | -3.33236140 | 3.57429569  | -4.85315500 |
| C | -0.21842896 | -4.45383188 | -4.74193300 |
| O | -1.42925016 | -4.67305747 | -4.85315500 |
| H | -1.67327990 | 4.50879013  | -5.53553700 |
| H | 3.06808685  | 3.70349796  | -5.53553700 |
| H | 4.74136674  | -0.80529217 | -5.53553700 |
| H | -3.06808685 | -3.70349796 | -5.53553700 |
| H | -4.74136674 | 0.80529217  | -5.53553700 |
| H | 1.67327990  | -4.50879013 | -5.53553700 |
| C | -0.37263840 | 3.76216871  | -3.51209500 |
| H | -1.45924988 | 3.82807699  | -3.52454700 |
| H | -0.09689304 | 2.69818143  | -3.59223400 |
| C | 3.07181447  | 2.20379867  | -3.51209500 |
| H | 2.58558698  | 3.17778596  | -3.52454700 |
| H | 2.28824714  | 1.43300254  | -3.59223400 |
| C | 3.44445287  | -1.55837003 | -3.51209500 |
| H | 4.04483686  | -0.65029103 | -3.52454700 |
| H | 2.38514018  | -1.26517888 | -3.59223400 |
| C | -3.07181447 | -2.20379867 | -3.51209500 |
| H | -2.58558698 | -3.17778596 | -3.52454700 |
| H | -2.28824714 | -1.43300254 | -3.59223400 |
| C | -3.44445287 | 1.55837003  | -3.51209500 |
| H | -4.04483686 | 0.65029103  | -3.52454700 |
| H | -2.38514018 | 1.26517888  | -3.59223400 |
| C | 0.37263840  | -3.76216871 | -3.51209500 |
| H | 1.45924988  | -3.82807699 | -3.52454700 |
| H | 0.09689304  | -2.69818143 | -3.59223400 |
| C | -0.80813858 | 4.61497790  | -1.27854400 |
| O | -2.02598538 | 4.48011183  | -1.42142300 |
| C | 3.59261880  | 3.00735749  | -1.27854400 |

|   |             |             |             |
|---|-------------|-------------|-------------|
| O | 2.86689797  | 3.99461073  | -1.42142300 |
| C | 4.40075739  | -1.60762040 | -1.27854400 |
| O | 4.89288335  | -0.48550111 | -1.42142300 |
| C | -3.59261880 | -3.00735749 | -1.27854400 |
| O | -2.86689797 | -3.99461073 | -1.42142300 |
| C | -4.40075739 | 1.60762040  | -1.27854400 |
| O | -4.89288335 | 0.48550111  | -1.42142300 |
| C | 0.80813858  | -4.61497790 | -1.27854400 |
| O | 2.02598538  | -4.48011183 | -1.42142300 |
| N | 0.08849829  | 4.31177190  | -2.25429000 |
| N | 3.77835315  | 2.07924419  | -2.25429000 |
| N | 3.68985486  | -2.23252772 | -2.25429000 |
| N | -3.77835315 | -2.07924419 | -2.25429000 |
| N | -3.68985486 | 2.23252772  | -2.25429000 |
| N | -0.08849829 | -4.31177190 | -2.25429000 |
| H | 4.29997462  | 1.22188422  | -2.05832700 |
| H | 3.20817009  | -3.11294515 | -2.05832700 |
| H | 1.09180454  | 4.33482937  | -2.05832700 |
| H | -4.29997462 | -1.22188422 | -2.05832700 |
| H | -3.20817009 | 3.11294515  | -2.05832700 |
| H | -1.09180454 | -4.33482937 | -2.05832700 |
| N | -0.69404803 | 4.74215404  | -5.70144200 |
| N | 3.75980186  | 2.97214025  | -5.70144200 |
| N | 4.45384988  | -1.77001380 | -5.70144200 |
| N | -3.75980186 | -2.97214025 | -5.70144200 |
| N | -4.45384988 | 1.77001380  | -5.70144200 |
| N | 0.69404803  | -4.74215404 | -5.70144200 |
| C | 4.38970264  | 2.90005393  | -7.01211500 |
| H | 4.98931749  | 3.80016993  | -7.19647300 |
| H | 5.03727266  | 2.02508835  | -7.03070600 |
| C | -0.31666905 | 5.25162097  | -7.01211500 |
| H | -0.79638495 | 6.22096066  | -7.19647300 |
| H | 0.76485838  | 5.37495027  | -7.03070600 |
| C | -4.70637170 | 2.35156704  | -7.01211500 |
| H | -4.27241429 | 3.34986192  | -7.03070600 |
| H | -5.78570244 | 2.42079073  | -7.19647300 |

|   |             |             |             |
|---|-------------|-------------|-------------|
| C | -4.38970264 | -2.90005393 | -7.01211500 |
| H | -4.98931749 | -3.80016993 | -7.19647300 |
| H | -5.03727266 | -2.02508835 | -7.03070600 |
| C | 0.31666905  | -5.25162097 | -7.01211500 |
| H | -0.76485838 | -5.37495027 | -7.03070600 |
| H | 0.79638495  | -6.22096066 | -7.19647300 |
| C | 4.70637170  | -2.35156704 | -7.01211500 |
| H | 5.78570244  | -2.42079073 | -7.19647300 |
| H | 4.27241429  | -3.34986192 | -7.03070600 |
| C | 0.76136123  | -4.27267404 | -8.09656700 |
| O | 0.01611591  | -3.69160829 | -8.87392200 |
| C | 3.31956364  | 2.79569519  | -8.09656700 |
| O | 3.18896860  | 1.85976093  | -8.87392200 |
| C | -0.76136123 | 4.27267404  | -8.09656700 |
| O | -0.01611591 | 3.69160829  | -8.87392200 |
| C | -4.08092487 | 1.47697885  | -8.09656700 |
| O | -3.20508451 | 1.83184736  | -8.87392200 |
| C | -3.31956364 | -2.79569519 | -8.09656700 |
| O | -3.18896860 | -1.85976093 | -8.87392200 |
| C | 4.08092487  | -1.47697885 | -8.09656700 |
| O | 3.20508451  | -1.83184736 | -8.87392200 |
| O | 2.07602784  | -4.10953574 | -8.07523900 |
| H | 2.37210691  | -3.31764995 | -8.61011600 |
| O | 2.52094843  | 3.85266072  | -8.07523900 |
| H | 1.68711569  | 3.71312982  | -8.61011600 |
| O | -2.07602784 | 4.10953574  | -8.07523900 |
| H | -2.37210691 | 3.31764995  | -8.61011600 |
| O | -4.59697627 | 0.25687502  | -8.07523900 |
| H | -4.05922259 | -0.39547987 | -8.61011600 |
| O | -2.52094843 | -3.85266072 | -8.07523900 |
| H | -1.68711569 | -3.71312982 | -8.61011600 |
| O | 4.59697627  | -0.25687502 | -8.07523900 |
| H | 4.05922259  | 0.39547987  | -8.61011600 |

**[P-CH<sub>2</sub>-P]<sub>8</sub>**

|   |            |            |            |
|---|------------|------------|------------|
| C | 1.50794300 | 5.77081700 | 4.70735400 |
| O | 2.73824100 | 5.72179700 | 4.81455900 |

|   |             |             |            |
|---|-------------|-------------|------------|
| C | 5.14686055  | 3.01430711  | 4.70735400 |
| O | 5.98215024  | 2.10969268  | 4.81455900 |
| C | -3.01430711 | 5.14686055  | 4.70735400 |
| O | -2.10969268 | 5.98215024  | 4.81455900 |
| C | -5.77081700 | 1.50794300  | 4.70735400 |
| O | -5.72179700 | 2.73824100  | 4.81455900 |
| H | -4.65727500 | 4.20221800  | 5.49294300 |
| H | -0.32177389 | 6.26460758  | 5.49294300 |
| H | 4.20221800  | 4.65727500  | 5.49294300 |
| H | -6.26460758 | -0.32177389 | 5.49294300 |
| C | -3.14269900 | 4.25471500  | 3.47107600 |
| H | -2.32174200 | 3.52289600  | 3.53330600 |
| H | -4.08545600 | 3.70993400  | 3.48835900 |
| C | 0.78631405  | 5.23076160  | 3.47107600 |
| H | 0.84934414  | 4.13278316  | 3.53330600 |
| H | -0.26553415 | 5.51217313  | 3.48835900 |
| C | 4.25471500  | 3.14269900  | 3.47107600 |
| H | 3.52289600  | 2.32174200  | 3.53330600 |
| H | 3.70993400  | 4.08545600  | 3.48835900 |
| C | -5.23076160 | 0.78631405  | 3.47107600 |
| H | -4.13278316 | 0.84934414  | 3.53330600 |
| H | -5.51217313 | -0.26553415 | 3.48835900 |
| C | 0.54948900  | 6.25079800  | 1.27387200 |
| O | -0.66328000 | 6.41460400  | 1.42953000 |
| C | 4.80852905  | 4.03143426  | 1.27387200 |
| O | 4.06680020  | 5.00481977  | 1.42953000 |
| C | -4.03143426 | 4.80852905  | 1.27387200 |
| O | -5.00481977 | 4.06680020  | 1.42953000 |
| C | -6.25079800 | 0.54948900  | 1.27387200 |
| O | -6.41460400 | -0.66328000 | 1.42953000 |
| C | -3.84112200 | 5.63678900  | 0.00000000 |
| H | -2.88000400 | 6.15829400  | 0.00000000 |
| H | -4.63932900 | 6.39026200  | 0.00000000 |
| C | 1.26972831  | 6.70189514  | 0.00000000 |
| H | 2.31810109  | 6.39104181  | 0.00000000 |
| H | 1.23809660  | 7.79909859  | 0.00000000 |

|   |             |            |            |
|---|-------------|------------|------------|
| C | 5.63678900  | 3.84112200 | 0.00000000 |
| H | 6.15829400  | 2.88000400 | 0.00000000 |
| H | 6.39026200  | 4.63932900 | 0.00000000 |
| C | -6.70189514 | 1.26972831 | 0.00000000 |
| H | -6.39104181 | 2.31810109 | 0.00000000 |
| H | -7.79909859 | 1.23809660 | 0.00000000 |
| N | 1.35007900  | 5.69697100 | 2.22073300 |
| N | 4.98301684  | 3.07371681 | 2.22073300 |
| N | -3.07371681 | 4.98301684 | 2.22073300 |
| N | -5.69697100 | 1.35007900 | 2.22073300 |
| H | 2.33912600  | 5.52534000 | 2.02624500 |
| H | 5.56101724  | 2.25299353 | 2.02624500 |
| H | -2.25299353 | 5.56101724 | 2.02624500 |
| H | -5.52534000 | 2.33912600 | 2.02624500 |
| N | -3.92947400 | 4.89579900 | 5.67209700 |
| N | 0.68329496  | 6.24041038 | 5.67209700 |
| N | 4.89579900  | 3.92947400 | 5.67209700 |
| N | -6.24041038 | 0.68329496 | 5.67209700 |
| C | 1.15955600  | 6.62963600 | 6.99206500 |
| H | 0.90968300  | 7.67845500 | 7.19330600 |
| H | 2.23977300  | 6.50150600 | 7.01892400 |
| C | -3.86793066 | 5.50779048 | 6.99206500 |
| H | -4.78624458 | 6.07273062 | 7.19330600 |
| H | -3.01350030 | 6.18101766 | 7.01892400 |
| C | -6.62963600 | 1.15955600 | 6.99206500 |
| H | -7.67845500 | 0.90968300 | 7.19330600 |
| H | -6.50150600 | 2.23977300 | 7.01892400 |
| C | 5.50779048  | 3.86793066 | 6.99206500 |
| H | 6.07273062  | 4.78624458 | 7.19330600 |
| H | 6.18101766  | 3.01350030 | 7.01892400 |
| C | -3.72312700 | 4.41280000 | 8.04836300 |
| O | -2.75274700 | 4.24495300 | 8.77356100 |
| C | 0.48767246  | 5.75296915 | 8.04836300 |
| O | 1.05514898  | 4.94812112 | 8.77356100 |
| C | -5.75296915 | 0.48767246 | 8.04836300 |
| O | -4.94812112 | 1.05514898 | 8.77356100 |

|   |             |             |            |
|---|-------------|-------------|------------|
| C | 4.41280000  | 3.72312700  | 8.04836300 |
| O | 4.24495300  | 2.75274700  | 8.77356100 |
| O | -4.79479000 | 3.63094400  | 8.05244800 |
| H | -4.67060500 | 2.78153300  | 8.56071600 |
| O | -0.82296340 | 5.95789365  | 8.05244800 |
| H | -1.33577562 | 5.26945731  | 8.56071600 |
| O | -5.95789365 | -0.82296340 | 8.05244800 |
| H | -5.26945731 | -1.33577562 | 8.56071600 |
| O | 3.63094400  | 4.79479000  | 8.05244800 |
| H | 2.78153300  | 4.67060500  | 8.56071600 |
| C | -1.50794300 | -5.77081700 | 4.70735400 |
| O | -2.73824100 | -5.72179700 | 4.81455900 |
| C | -5.14686055 | -3.01430711 | 4.70735400 |
| O | -5.98215024 | -2.10969268 | 4.81455900 |
| C | 3.01430711  | -5.14686055 | 4.70735400 |
| O | 2.10969268  | -5.98215024 | 4.81455900 |
| C | 5.77081700  | -1.50794300 | 4.70735400 |
| O | 5.72179700  | -2.73824100 | 4.81455900 |
| H | 4.65727500  | -4.20221800 | 5.49294300 |
| H | 0.32177389  | -6.26460758 | 5.49294300 |
| H | -4.20221800 | -4.65727500 | 5.49294300 |
| H | 6.26460758  | 0.32177389  | 5.49294300 |
| C | 3.14269900  | -4.25471500 | 3.47107600 |
| H | 2.32174200  | -3.52289600 | 3.53330600 |
| H | 4.08545600  | -3.70993400 | 3.48835900 |
| C | -0.78631405 | -5.23076160 | 3.47107600 |
| H | -0.84934414 | -4.13278316 | 3.53330600 |
| H | 0.26553415  | -5.51217313 | 3.48835900 |
| C | -4.25471500 | -3.14269900 | 3.47107600 |
| H | -3.52289600 | -2.32174200 | 3.53330600 |
| H | -3.70993400 | -4.08545600 | 3.48835900 |
| C | 5.23076160  | -0.78631405 | 3.47107600 |
| H | 4.13278316  | -0.84934414 | 3.53330600 |
| H | 5.51217313  | 0.26553415  | 3.48835900 |
| C | -0.54948900 | -6.25079800 | 1.27387200 |
| O | 0.66328000  | -6.41460400 | 1.42953000 |

|   |             |             |            |
|---|-------------|-------------|------------|
| C | -4.80852905 | -4.03143426 | 1.27387200 |
| O | -4.06680020 | -5.00481977 | 1.42953000 |
| C | 4.03143426  | -4.80852905 | 1.27387200 |
| O | 5.00481977  | -4.06680020 | 1.42953000 |
| C | 6.25079800  | -0.54948900 | 1.27387200 |
| O | 6.41460400  | 0.66328000  | 1.42953000 |
| C | 3.84112200  | -5.63678900 | 0.00000000 |
| H | 2.88000400  | -6.15829400 | 0.00000000 |
| H | 4.63932900  | -6.39026200 | 0.00000000 |
| C | -1.26972831 | -6.70189514 | 0.00000000 |
| H | -2.31810109 | -6.39104181 | 0.00000000 |
| H | -1.23809660 | -7.79909859 | 0.00000000 |
| C | -5.63678900 | -3.84112200 | 0.00000000 |
| H | -6.15829400 | -2.88000400 | 0.00000000 |
| H | -6.39026200 | -4.63932900 | 0.00000000 |
| C | 6.70189514  | -1.26972831 | 0.00000000 |
| H | 6.39104181  | -2.31810109 | 0.00000000 |
| H | 7.79909859  | -1.23809660 | 0.00000000 |
| N | -1.35007900 | -5.69697100 | 2.22073300 |
| N | -4.98301684 | -3.07371681 | 2.22073300 |
| N | 3.07371681  | -4.98301684 | 2.22073300 |
| N | 5.69697100  | -1.35007900 | 2.22073300 |
| H | -2.33912600 | -5.52534000 | 2.02624500 |
| H | -5.56101724 | -2.25299353 | 2.02624500 |
| H | 2.25299353  | -5.56101724 | 2.02624500 |
| H | 5.52534000  | -2.33912600 | 2.02624500 |
| N | 3.92947400  | -4.89579900 | 5.67209700 |
| N | -0.68329496 | -6.24041038 | 5.67209700 |
| N | -4.89579900 | -3.92947400 | 5.67209700 |
| N | 6.24041038  | -0.68329496 | 5.67209700 |
| C | -1.15955600 | -6.62963600 | 6.99206500 |
| H | -0.90968300 | -7.67845500 | 7.19330600 |
| H | -2.23977300 | -6.50150600 | 7.01892400 |
| C | 3.86793066  | -5.50779048 | 6.99206500 |
| H | 4.78624458  | -6.07273062 | 7.19330600 |
| H | 3.01350030  | -6.18101766 | 7.01892400 |

|   |             |             |             |
|---|-------------|-------------|-------------|
| C | 6.62963600  | -1.15955600 | 6.99206500  |
| H | 7.67845500  | -0.90968300 | 7.19330600  |
| H | 6.50150600  | -2.23977300 | 7.01892400  |
| C | -5.50779048 | -3.86793066 | 6.99206500  |
| H | -6.07273062 | -4.78624458 | 7.19330600  |
| H | -6.18101766 | -3.01350030 | 7.01892400  |
| C | 3.72312700  | -4.41280000 | 8.04836300  |
| O | 2.75274700  | -4.24495300 | 8.77356100  |
| C | -0.48767246 | -5.75296915 | 8.04836300  |
| O | -1.05514898 | -4.94812112 | 8.77356100  |
| C | 5.75296915  | -0.48767246 | 8.04836300  |
| O | 4.94812112  | -1.05514898 | 8.77356100  |
| C | -4.41280000 | -3.72312700 | 8.04836300  |
| O | -4.24495300 | -2.75274700 | 8.77356100  |
| O | 4.79479000  | -3.63094400 | 8.05244800  |
| H | 4.67060500  | -2.78153300 | 8.56071600  |
| O | 0.82296340  | -5.95789365 | 8.05244800  |
| H | 1.33577562  | -5.26945731 | 8.56071600  |
| O | 5.95789365  | 0.82296340  | 8.05244800  |
| H | 5.26945731  | 1.33577562  | 8.56071600  |
| O | -3.63094400 | -4.79479000 | 8.05244800  |
| H | -2.78153300 | -4.67060500 | 8.56071600  |
| C | 5.14686055  | 3.01430711  | -4.70735400 |
| O | 5.98215024  | 2.10969268  | -4.81455900 |
| C | 5.77081700  | -1.50794300 | -4.70735400 |
| O | 5.72179700  | -2.73824100 | -4.81455900 |
| C | 1.50794300  | 5.77081700  | -4.70735400 |
| O | 2.73824100  | 5.72179700  | -4.81455900 |
| C | -3.01430711 | 5.14686055  | -4.70735400 |
| O | -2.10969268 | 5.98215024  | -4.81455900 |
| H | -0.32177389 | 6.26460758  | -5.49294300 |
| H | 4.20221800  | 4.65727500  | -5.49294300 |
| H | 6.26460758  | 0.32177389  | -5.49294300 |
| H | -4.65727500 | 4.20221800  | -5.49294300 |
| C | 0.78631405  | 5.23076160  | -3.47107600 |
| H | 0.84934414  | 4.13278316  | -3.53330600 |



|   |             |             |             |
|---|-------------|-------------|-------------|
| H | -0.26553415 | 5.51217313  | -3.48835900 |
| C | 4.25471500  | 3.14269900  | -3.47107600 |
| H | 3.52289600  | 2.32174200  | -3.53330600 |
| H | 3.70993400  | 4.08545600  | -3.48835900 |
| C | 5.23076160  | -0.78631405 | -3.47107600 |
| H | 4.13278316  | -0.84934414 | -3.53330600 |
| H | 5.51217313  | 0.26553415  | -3.48835900 |
| C | -3.14269900 | 4.25471500  | -3.47107600 |
| H | -2.32174200 | 3.52289600  | -3.53330600 |
| H | -4.08545600 | 3.70993400  | -3.48835900 |
| C | 4.80852905  | 4.03143426  | -1.27387200 |
| O | 4.06680020  | 5.00481977  | -1.42953000 |
| C | 6.25079800  | -0.54948900 | -1.27387200 |
| O | 6.41460400  | 0.66328000  | -1.42953000 |
| C | 0.54948900  | 6.25079800  | -1.27387200 |
| O | -0.66328000 | 6.41460400  | -1.42953000 |
| C | -4.03143426 | 4.80852905  | -1.27387200 |
| O | -5.00481977 | 4.06680020  | -1.42953000 |
| N | 4.98301684  | 3.07371681  | -2.22073300 |
| N | 5.69697100  | -1.35007900 | -2.22073300 |
| N | 1.35007900  | 5.69697100  | -2.22073300 |
| N | -3.07371681 | 4.98301684  | -2.22073300 |
| H | 5.56101724  | 2.25299353  | -2.02624500 |
| H | 5.52534000  | -2.33912600 | -2.02624500 |
| H | 2.33912600  | 5.52534000  | -2.02624500 |
| H | -2.25299353 | 5.56101724  | -2.02624500 |
| N | -3.92947400 | 4.89579900  | -5.67209700 |
| N | 0.68329496  | 6.24041038  | -5.67209700 |
| N | 4.89579900  | 3.92947400  | -5.67209700 |
| N | 6.24041038  | -0.68329496 | -5.67209700 |
| C | 5.50779048  | 3.86793066  | -6.99206500 |
| H | 6.07273062  | 4.78624458  | -7.19330600 |
| H | 6.18101766  | 3.01350030  | -7.01892400 |
| C | 1.15955600  | 6.62963600  | -6.99206500 |
| H | 0.90968300  | 7.67845500  | -7.19330600 |
| H | 2.23977300  | 6.50150600  | -7.01892400 |

|   |             |             |             |
|---|-------------|-------------|-------------|
| C | -3.86793066 | 5.50779048  | -6.99206500 |
| H | -3.01350030 | 6.18101766  | -7.01892400 |
| H | -4.78624458 | 6.07273062  | -7.19330600 |
| C | 6.62963600  | -1.15955600 | -6.99206500 |
| H | 7.67845500  | -0.90968300 | -7.19330600 |
| H | 6.50150600  | -2.23977300 | -7.01892400 |
| C | 0.48767246  | 5.75296915  | -8.04836300 |
| O | 1.05514898  | 4.94812112  | -8.77356100 |
| C | 4.41280000  | 3.72312700  | -8.04836300 |
| O | 4.24495300  | 2.75274700  | -8.77356100 |
| C | -3.72312700 | 4.41280000  | -8.04836300 |
| O | -2.75274700 | 4.24495300  | -8.77356100 |
| C | 5.75296915  | -0.48767246 | -8.04836300 |
| O | 4.94812112  | -1.05514898 | -8.77356100 |
| O | -4.79479000 | 3.63094400  | -8.05244800 |
| H | -4.67060500 | 2.78153300  | -8.56071600 |
| O | -0.82296340 | 5.95789365  | -8.05244800 |
| H | -1.33577562 | 5.26945731  | -8.56071600 |
| O | 3.63094400  | 4.79479000  | -8.05244800 |
| H | 2.78153300  | 4.67060500  | -8.56071600 |
| O | 5.95789365  | 0.82296340  | -8.05244800 |
| H | 5.26945731  | 1.33577562  | -8.56071600 |
| C | -5.14686055 | -3.01430711 | -4.70735400 |
| O | -5.98215024 | -2.10969268 | -4.81455900 |
| C | -5.77081700 | 1.50794300  | -4.70735400 |
| O | -5.72179700 | 2.73824100  | -4.81455900 |
| C | -1.50794300 | -5.77081700 | -4.70735400 |
| O | -2.73824100 | -5.72179700 | -4.81455900 |
| C | 3.01430711  | -5.14686055 | -4.70735400 |
| O | 2.10969268  | -5.98215024 | -4.81455900 |
| H | 0.32177389  | -6.26460758 | -5.49294300 |
| H | -4.20221800 | -4.65727500 | -5.49294300 |
| H | -6.26460758 | -0.32177389 | -5.49294300 |
| H | 4.65727500  | -4.20221800 | -5.49294300 |
| C | -0.78631405 | -5.23076160 | -3.47107600 |
| H | -0.84934414 | -4.13278316 | -3.53330600 |

|   |             |             |             |
|---|-------------|-------------|-------------|
| H | 0.26553415  | -5.51217313 | -3.48835900 |
| C | -4.25471500 | -3.14269900 | -3.47107600 |
| H | -3.52289600 | -2.32174200 | -3.53330600 |
| H | -3.70993400 | -4.08545600 | -3.48835900 |
| C | -5.23076160 | 0.78631405  | -3.47107600 |
| H | -4.13278316 | 0.84934414  | -3.53330600 |
| H | -5.51217313 | -0.26553415 | -3.48835900 |
| C | 3.14269900  | -4.25471500 | -3.47107600 |
| H | 2.32174200  | -3.52289600 | -3.53330600 |
| H | 4.08545600  | -3.70993400 | -3.48835900 |
| C | -4.80852905 | -4.03143426 | -1.27387200 |
| O | -4.06680020 | -5.00481977 | -1.42953000 |
| C | -6.25079800 | 0.54948900  | -1.27387200 |
| O | -6.41460400 | -0.66328000 | -1.42953000 |
| C | -0.54948900 | -6.25079800 | -1.27387200 |
| O | 0.66328000  | -6.41460400 | -1.42953000 |
| C | 4.03143426  | -4.80852905 | -1.27387200 |
| O | 5.00481977  | -4.06680020 | -1.42953000 |
| N | -4.98301684 | -3.07371681 | -2.22073300 |
| N | -5.69697100 | 1.35007900  | -2.22073300 |
| N | -1.35007900 | -5.69697100 | -2.22073300 |
| N | 3.07371681  | -4.98301684 | -2.22073300 |
| H | -5.56101724 | -2.25299353 | -2.02624500 |
| H | -5.52534000 | 2.33912600  | -2.02624500 |
| H | -2.33912600 | -5.52534000 | -2.02624500 |
| H | 2.25299353  | -5.56101724 | -2.02624500 |
| N | 3.92947400  | -4.89579900 | -5.67209700 |
| N | -0.68329496 | -6.24041038 | -5.67209700 |
| N | -4.89579900 | -3.92947400 | -5.67209700 |
| N | -6.24041038 | 0.68329496  | -5.67209700 |
| C | -5.50779048 | -3.86793066 | -6.99206500 |
| H | -6.07273062 | -4.78624458 | -7.19330600 |
| H | -6.18101766 | -3.01350030 | -7.01892400 |
| C | -1.15955600 | -6.62963600 | -6.99206500 |
| H | -0.90968300 | -7.67845500 | -7.19330600 |
| H | -2.23977300 | -6.50150600 | -7.01892400 |

|   |             |             |             |
|---|-------------|-------------|-------------|
| C | 3.86793066  | -5.50779048 | -6.99206500 |
| H | 3.01350030  | -6.18101766 | -7.01892400 |
| H | 4.78624458  | -6.07273062 | -7.19330600 |
| C | -6.62963600 | 1.15955600  | -6.99206500 |
| H | -7.67845500 | 0.90968300  | -7.19330600 |
| H | -6.50150600 | 2.23977300  | -7.01892400 |
| C | -0.48767246 | -5.75296915 | -8.04836300 |
| O | -1.05514898 | -4.94812112 | -8.77356100 |
| C | -4.41280000 | -3.72312700 | -8.04836300 |
| O | -4.24495300 | -2.75274700 | -8.77356100 |
| C | 3.72312700  | -4.41280000 | -8.04836300 |
| O | 2.75274700  | -4.24495300 | -8.77356100 |
| C | -5.75296915 | 0.48767246  | -8.04836300 |
| O | -4.94812112 | 1.05514898  | -8.77356100 |
| O | 4.79479000  | -3.63094400 | -8.05244800 |
| H | 4.67060500  | -2.78153300 | -8.56071600 |
| O | 0.82296340  | -5.95789365 | -8.05244800 |
| H | 1.33577562  | -5.26945731 | -8.56071600 |
| O | -3.63094400 | -4.79479000 | -8.05244800 |
| H | -2.78153300 | -4.67060500 | -8.56071600 |
| O | -5.95789365 | -0.82296340 | -8.05244800 |
| H | -5.26945731 | -1.33577562 | -8.56071600 |

**[P-CH<sub>2</sub>-P]<sub>10</sub>**

|   |             |             |            |
|---|-------------|-------------|------------|
| C | -2.89908339 | 6.89413122  | 4.68820600 |
| O | -1.88377713 | 7.59168998  | 4.78931900 |
| C | 1.70686093  | 7.28150778  | 4.68820600 |
| O | 2.93827570  | 7.24906263  | 4.78931900 |
| C | -6.39767639 | 3.87343086  | 4.68820600 |
| O | -5.98629112 | 5.03454980  | 4.78931900 |
| C | -5.66084238 | -4.88759586 | 4.68820600 |
| O | -6.63800708 | -4.13753974 | 4.78931900 |
| C | -7.45257446 | -0.62678844 | 4.68820600 |
| O | -7.80224537 | 0.55438271  | 4.78931900 |
| H | -7.41427359 | 2.27846014  | 5.48160400 |
| H | -4.65902807 | 6.20131365  | 5.48160400 |
| H | -0.12419218 | 7.75547611  | 5.48160400 |

|   |             |             |            |
|---|-------------|-------------|------------|
| H | -4.45808090 | -6.34731031 | 5.48160400 |
| H | -7.33751860 | -2.51468770 | 5.48160400 |
| C | -6.11448310 | 3.02991592  | 3.44388800 |
| H | -5.04491766 | 2.77113722  | 3.48673900 |
| H | -6.69004334 | 2.10556429  | 3.46573800 |
| C | -3.16578085 | 6.04525646  | 3.44388800 |
| H | -2.45259053 | 5.20722530  | 3.48673900 |
| H | -4.17473912 | 5.63574611  | 3.46573800 |
| C | 0.99214209  | 6.75151450  | 3.44388800 |
| H | 1.07654282  | 5.65433031  | 3.48673900 |
| H | -0.06482645 | 7.01326446  | 3.46573800 |
| C | -4.77110046 | -4.87892349 | 3.44388800 |
| H | -4.19447340 | -3.94167332 | 3.48673900 |
| H | -4.06984772 | -5.71195417 | 3.46573800 |
| C | -6.72766063 | -1.14274952 | 3.44388800 |
| H | -5.71025771 | -0.72343109 | 3.48673900 |
| H | -6.64997840 | -2.22887152 | 3.46573800 |
| C | -3.99607024 | 6.76540782  | 1.27092300 |
| O | -5.06999610 | 6.18055055  | 1.43337700 |
| C | 0.74371821  | 7.82216105  | 1.27092300 |
| O | -0.46887655 | 7.98023936  | 1.43337700 |
| C | -7.20949567 | 3.12449875  | 1.27092300 |
| O | -7.73454947 | 2.02010149  | 1.43337700 |
| C | -5.19943158 | -5.89111463 | 1.27092300 |
| O | -4.31133791 | -6.73174798 | 1.43337700 |
| C | -7.66913881 | -1.70986265 | 1.27092300 |
| O | -7.44476783 | -2.91195768 | 1.43337700 |
| C | -7.44041755 | 3.94739919  | 0.00000000 |
| H | -6.84511584 | 4.86457366  | 0.00000000 |
| H | -8.50208339 | 4.22500115  | 0.00000000 |
| C | -3.69920121 | 7.56688074  | 0.00000000 |
| H | -2.67849039 | 7.95898090  | 0.00000000 |
| H | -4.39493658 | 8.41549697  | 0.00000000 |
| C | 1.45498426  | 8.29607103  | 0.00000000 |
| H | 2.51122736  | 8.01332796  | 0.00000000 |
| H | 1.39092662  | 9.39155897  | 0.00000000 |

|   |             |             |            |
|---|-------------|-------------|------------|
| C | -6.05341519 | -5.85644416 | 0.00000000 |
| H | -6.74174160 | -5.00685609 | 0.00000000 |
| H | -6.64550313 | -6.78036466 | 0.00000000 |
| C | -8.33964727 | -1.17985467 | 0.00000000 |
| H | -8.39713970 | -0.08793538 | 0.00000000 |
| H | -9.36172332 | -1.57930150 | 0.00000000 |
| N | -3.00816801 | 6.77474432  | 2.20194200 |
| N | 1.54843576  | 7.24904008  | 2.20194200 |
| N | -6.41575384 | 3.71272649  | 2.20194200 |
| N | -5.51358969 | -4.95444891 | 2.20194200 |
| N | -7.37273977 | -0.76742666 | 2.20194200 |
| H | -2.12015754 | 7.24342458  | 2.00987900 |
| H | 2.54233466  | 7.10625092  | 2.00987900 |
| H | -5.97282163 | 4.61385625  | 2.00987900 |
| H | -6.23374144 | -4.25473094 | 2.00987900 |
| H | -7.54407086 | 0.22195165  | 2.00987900 |
| N | -7.61392881 | -1.54851783 | 5.66469200 |
| N | -7.06999375 | 3.22257783  | 5.66469200 |
| N | -3.82556137 | 6.76275829  | 5.66469200 |
| N | 0.88010543  | 7.71979494  | 5.66469200 |
| N | -5.24960186 | -5.72813231 | 5.66469200 |
| C | -3.65996236 | 7.34175628  | 6.99044600 |
| H | -4.48064792 | 8.03583991  | 7.20863100 |
| H | -2.71330434 | 7.87658196  | 7.01822900 |
| C | -7.27634781 | 3.78833370  | 6.99044600 |
| H | -8.34826850 | 3.86747229  | 7.20863100 |
| H | -6.82484804 | 4.77744838  | 7.01822900 |
| C | -8.11341572 | -1.21210359 | 6.99044600 |
| H | -8.32953175 | -0.14650809 | 7.01822900 |
| H | -9.02713426 | -1.77813830 | 7.20863100 |
| C | -5.85143458 | -5.74955851 | 6.99044600 |
| H | -6.25794156 | -6.74456049 | 7.20863100 |
| H | -6.65261745 | -5.01450346 | 7.01822900 |
| C | 1.35440432  | 8.09087750  | 6.99044600 |
| H | 1.09842788  | 9.13478982  | 7.20863100 |
| H | 2.43462939  | 7.96712894  | 7.01822900 |

|   |             |             |            |
|---|-------------|-------------|------------|
| C | -6.62941806 | 2.87310469  | 8.03009300 |
| O | -5.66463067 | 3.14933260  | 8.72727800 |
| C | -3.67454331 | 6.22106469  | 8.03009300 |
| O | -2.73165122 | 5.87744996  | 8.72727800 |
| C | -7.05208044 | -1.57228365 | 8.03009300 |
| O | -6.43391374 | -0.78172277 | 8.72727800 |
| C | -4.78108778 | -5.41711307 | 8.03009300 |
| O | -4.74566044 | -4.41418662 | 8.72727800 |
| C | 0.68388209  | 7.19278942  | 8.03009300 |
| O | 1.24472615  | 6.36058121  | 8.72727800 |
| O | -6.86231023 | -2.88728209 | 8.04793400 |
| H | -6.05405020 | -3.18006566 | 8.54778000 |
| O | -7.24882743 | 1.69770448  | 8.04793400 |
| H | -6.76702520 | 0.98575426  | 8.54778000 |
| O | -4.86653892 | 5.63422563  | 8.04793400 |
| H | -4.89522657 | 4.77504956  | 8.54778000 |
| O | -3.85462377 | -6.36942502 | 8.04793400 |
| H | -3.02863380 | -6.13120859 | 8.54778000 |
| O | -0.62539796 | 7.41866409  | 8.04793400 |
| H | -1.15361777 | 6.74043823  | 8.54778000 |
| C | 2.89908339  | -6.89413122 | 4.68820600 |
| O | 1.88377713  | -7.59168998 | 4.78931900 |
| C | -1.70686093 | -7.28150778 | 4.68820600 |
| O | -2.93827570 | -7.24906263 | 4.78931900 |
| C | 6.39767639  | -3.87343086 | 4.68820600 |
| O | 5.98629112  | -5.03454980 | 4.78931900 |
| C | 5.66084238  | 4.88759586  | 4.68820600 |
| O | 6.63800708  | 4.13753974  | 4.78931900 |
| C | 7.45257446  | 0.62678844  | 4.68820600 |
| O | 7.80224537  | -0.55438271 | 4.78931900 |
| H | 7.41427359  | -2.27846014 | 5.48160400 |
| H | 4.65902807  | -6.20131365 | 5.48160400 |
| H | 0.12419218  | -7.75547611 | 5.48160400 |
| H | 4.45808090  | 6.34731031  | 5.48160400 |
| H | 7.33751860  | 2.51468770  | 5.48160400 |
| C | 6.11448310  | -3.02991592 | 3.44388800 |

|   |             |             |            |
|---|-------------|-------------|------------|
| H | 5.04491766  | -2.77113722 | 3.48673900 |
| H | 6.69004334  | -2.10556429 | 3.46573800 |
| C | 3.16578085  | -6.04525646 | 3.44388800 |
| H | 2.45259053  | -5.20722530 | 3.48673900 |
| H | 4.17473912  | -5.63574611 | 3.46573800 |
| C | -0.99214209 | -6.75151450 | 3.44388800 |
| H | -1.07654282 | -5.65433031 | 3.48673900 |
| H | 0.06482645  | -7.01326446 | 3.46573800 |
| C | 4.77110046  | 4.87892349  | 3.44388800 |
| H | 4.19447340  | 3.94167332  | 3.48673900 |
| H | 4.06984772  | 5.71195417  | 3.46573800 |
| C | 6.72766063  | 1.14274952  | 3.44388800 |
| H | 5.71025771  | 0.72343109  | 3.48673900 |
| H | 6.64997840  | 2.22887152  | 3.46573800 |
| C | 3.99607024  | -6.76540782 | 1.27092300 |
| O | 5.06999610  | -6.18055055 | 1.43337700 |
| C | -0.74371821 | -7.82216105 | 1.27092300 |
| O | 0.46887655  | -7.98023936 | 1.43337700 |
| C | 7.20949567  | -3.12449875 | 1.27092300 |
| O | 7.73454947  | -2.02010149 | 1.43337700 |
| C | 5.19943158  | 5.89111463  | 1.27092300 |
| O | 4.31133791  | 6.73174798  | 1.43337700 |
| C | 7.66913881  | 1.70986265  | 1.27092300 |
| O | 7.44476783  | 2.91195768  | 1.43337700 |
| C | 7.44041755  | -3.94739919 | 0.00000000 |
| H | 6.84511584  | -4.86457366 | 0.00000000 |
| H | 8.50208339  | -4.22500115 | 0.00000000 |
| C | 3.69920121  | -7.56688074 | 0.00000000 |
| H | 2.67849039  | -7.95898090 | 0.00000000 |
| H | 4.39493658  | -8.41549697 | 0.00000000 |
| C | -1.45498426 | -8.29607103 | 0.00000000 |
| H | -2.51122736 | -8.01332796 | 0.00000000 |
| H | -1.39092662 | -9.39155897 | 0.00000000 |
| C | 6.05341519  | 5.85644416  | 0.00000000 |
| H | 6.74174160  | 5.00685609  | 0.00000000 |
| H | 6.64550313  | 6.78036466  | 0.00000000 |



|   |             |             |            |
|---|-------------|-------------|------------|
| C | 8.33964727  | 1.17985467  | 0.00000000 |
| H | 8.39713970  | 0.08793538  | 0.00000000 |
| H | 9.36172332  | 1.57930150  | 0.00000000 |
| N | 3.00816801  | -6.77474432 | 2.20194200 |
| N | -1.54843576 | -7.24904008 | 2.20194200 |
| N | 6.41575384  | -3.71272649 | 2.20194200 |
| N | 5.51358969  | 4.95444891  | 2.20194200 |
| N | 7.37273977  | 0.76742666  | 2.20194200 |
| H | 2.12015754  | -7.24342458 | 2.00987900 |
| H | -2.54233466 | -7.10625092 | 2.00987900 |
| H | 5.97282163  | -4.61385625 | 2.00987900 |
| H | 6.23374144  | 4.25473094  | 2.00987900 |
| H | 7.54407086  | -0.22195165 | 2.00987900 |
| N | 7.61392881  | 1.54851783  | 5.66469200 |
| N | 7.06999375  | -3.22257783 | 5.66469200 |
| N | 3.82556137  | -6.76275829 | 5.66469200 |
| N | -0.88010543 | -7.71979494 | 5.66469200 |
| N | 5.24960186  | 5.72813231  | 5.66469200 |
| C | 3.65996236  | -7.34175628 | 6.99044600 |
| H | 4.48064792  | -8.03583991 | 7.20863100 |
| H | 2.71330434  | -7.87658196 | 7.01822900 |
| C | 7.27634781  | -3.78833370 | 6.99044600 |
| H | 8.34826850  | -3.86747229 | 7.20863100 |
| H | 6.82484804  | -4.77744838 | 7.01822900 |
| C | 8.11341572  | 1.21210359  | 6.99044600 |
| H | 8.32953175  | 0.14650809  | 7.01822900 |
| H | 9.02713426  | 1.77813830  | 7.20863100 |
| C | 5.85143458  | 5.74955851  | 6.99044600 |
| H | 6.25794156  | 6.74456049  | 7.20863100 |
| H | 6.65261745  | 5.01450346  | 7.01822900 |
| C | -1.35440432 | -8.09087750 | 6.99044600 |
| H | -1.09842788 | -9.13478982 | 7.20863100 |
| H | -2.43462939 | -7.96712894 | 7.01822900 |
| C | 6.62941806  | -2.87310469 | 8.03009300 |
| O | 5.66463067  | -3.14933260 | 8.72727800 |
| C | 3.67454331  | -6.22106469 | 8.03009300 |

|   |             |             |             |
|---|-------------|-------------|-------------|
| O | 2.73165122  | -5.87744996 | 8.72727800  |
| C | 7.05208044  | 1.57228365  | 8.03009300  |
| O | 6.43391374  | 0.78172277  | 8.72727800  |
| C | 4.78108778  | 5.41711307  | 8.03009300  |
| O | 4.74566044  | 4.41418662  | 8.72727800  |
| C | -0.68388209 | -7.19278942 | 8.03009300  |
| O | -1.24472615 | -6.36058121 | 8.72727800  |
| O | 6.86231023  | 2.88728209  | 8.04793400  |
| H | 6.05405020  | 3.18006566  | 8.54778000  |
| O | 7.24882743  | -1.69770448 | 8.04793400  |
| H | 6.76702520  | -0.98575426 | 8.54778000  |
| O | 4.86653892  | -5.63422563 | 8.04793400  |
| H | 4.89522657  | -4.77504956 | 8.54778000  |
| O | 3.85462377  | 6.36942502  | 8.04793400  |
| H | 3.02863380  | 6.13120859  | 8.54778000  |
| O | 0.62539796  | -7.41866409 | 8.04793400  |
| H | 1.15361777  | -6.74043823 | 8.54778000  |
| C | 1.70686093  | 7.28150778  | -4.68820600 |
| O | 2.93827570  | 7.24906263  | -4.78931900 |
| C | 5.66084238  | 4.88759586  | -4.68820600 |
| O | 6.63800708  | 4.13753974  | -4.78931900 |
| C | -2.89908339 | 6.89413122  | -4.68820600 |
| O | -1.88377713 | 7.59168998  | -4.78931900 |
| C | -7.45257446 | -0.62678844 | -4.68820600 |
| O | -7.80224537 | 0.55438271  | -4.78931900 |
| C | -6.39767639 | 3.87343086  | -4.68820600 |
| O | -5.98629112 | 5.03454980  | -4.78931900 |
| H | -4.65902807 | 6.20131365  | -5.48160400 |
| H | -0.12419218 | 7.75547611  | -5.48160400 |
| H | 4.45808090  | 6.34731031  | -5.48160400 |
| H | -7.33751860 | -2.51468770 | -5.48160400 |
| H | -7.41427359 | 2.27846014  | -5.48160400 |
| C | -3.16578085 | 6.04525646  | -3.44388800 |
| H | -2.45259053 | 5.20722530  | -3.48673900 |
| H | -4.17473912 | 5.63574611  | -3.46573800 |
| C | 0.99214209  | 6.75151450  | -3.44388800 |

|   |             |             |             |
|---|-------------|-------------|-------------|
| H | 1.07654282  | 5.65433031  | -3.48673900 |
| H | -0.06482645 | 7.01326446  | -3.46573800 |
| C | 4.77110046  | 4.87892349  | -3.44388800 |
| H | 4.19447340  | 3.94167332  | -3.48673900 |
| H | 4.06984772  | 5.71195417  | -3.46573800 |
| C | -6.72766063 | -1.14274952 | -3.44388800 |
| H | -5.71025771 | -0.72343109 | -3.48673900 |
| H | -6.64997840 | -2.22887152 | -3.46573800 |
| C | -6.11448310 | 3.02991592  | -3.44388800 |
| H | -5.04491766 | 2.77113722  | -3.48673900 |
| H | -6.69004334 | 2.10556429  | -3.46573800 |
| C | 0.74371821  | 7.82216105  | -1.27092300 |
| O | -0.46887655 | 7.98023936  | -1.43337700 |
| C | 5.19943158  | 5.89111463  | -1.27092300 |
| O | 4.31133791  | 6.73174798  | -1.43337700 |
| C | -3.99607024 | 6.76540782  | -1.27092300 |
| O | -5.06999610 | 6.18055055  | -1.43337700 |
| C | -7.66913881 | -1.70986265 | -1.27092300 |
| O | -7.44476783 | -2.91195768 | -1.43337700 |
| C | -7.20949567 | 3.12449875  | -1.27092300 |
| O | -7.73454947 | 2.02010149  | -1.43337700 |
| N | 1.54843576  | 7.24904008  | -2.20194200 |
| N | 5.51358969  | 4.95444891  | -2.20194200 |
| N | -3.00816801 | 6.77474432  | -2.20194200 |
| N | -7.37273977 | -0.76742666 | -2.20194200 |
| N | -6.41575384 | 3.71272649  | -2.20194200 |
| H | 2.54233466  | 7.10625092  | -2.00987900 |
| H | 6.23374144  | 4.25473094  | -2.00987900 |
| H | -2.12015754 | 7.24342458  | -2.00987900 |
| H | -7.54407086 | 0.22195165  | -2.00987900 |
| H | -5.97282163 | 4.61385625  | -2.00987900 |
| N | -7.06999375 | 3.22257783  | -5.66469200 |
| N | -3.82556137 | 6.76275829  | -5.66469200 |
| N | 0.88010543  | 7.71979494  | -5.66469200 |
| N | 5.24960186  | 5.72813231  | -5.66469200 |
| N | -7.61392881 | -1.54851783 | -5.66469200 |

|   |             |             |             |
|---|-------------|-------------|-------------|
| C | 1.35440432  | 8.09087750  | -6.99044600 |
| H | 1.09842788  | 9.13478982  | -7.20863100 |
| H | 2.43462939  | 7.96712894  | -7.01822900 |
| C | -3.65996236 | 7.34175628  | -6.99044600 |
| H | -4.48064792 | 8.03583991  | -7.20863100 |
| H | -2.71330434 | 7.87658196  | -7.01822900 |
| C | -7.27634781 | 3.78833370  | -6.99044600 |
| H | -6.82484804 | 4.77744838  | -7.01822900 |
| H | -8.34826850 | 3.86747229  | -7.20863100 |
| C | -8.11341572 | -1.21210359 | -6.99044600 |
| H | -9.02713426 | -1.77813830 | -7.20863100 |
| H | -8.32953175 | -0.14650809 | -7.01822900 |
| C | 5.85143458  | 5.74955851  | -6.99044600 |
| H | 6.25794156  | 6.74456049  | -7.20863100 |
| H | 6.65261745  | 5.01450346  | -7.01822900 |
| C | -3.67454331 | 6.22106469  | -8.03009300 |
| O | -2.73165122 | 5.87744996  | -8.72727800 |
| C | 0.68388209  | 7.19278942  | -8.03009300 |
| O | 1.24472615  | 6.36058121  | -8.72727800 |
| C | -6.62941806 | 2.87310469  | -8.03009300 |
| O | -5.66463067 | 3.14933260  | -8.72727800 |
| C | -7.05208044 | -1.57228365 | -8.03009300 |
| O | -6.43391374 | -0.78172277 | -8.72727800 |
| C | 4.78108778  | 5.41711307  | -8.03009300 |
| O | 4.74566044  | 4.41418662  | -8.72727800 |
| O | -7.24882743 | 1.69770448  | -8.04793400 |
| H | -6.76702520 | 0.98575426  | -8.54778000 |
| O | -4.86653892 | 5.63422563  | -8.04793400 |
| H | -4.89522657 | 4.77504956  | -8.54778000 |
| O | -0.62539796 | 7.41866409  | -8.04793400 |
| H | -1.15361777 | 6.74043823  | -8.54778000 |
| O | -6.86231023 | -2.88728209 | -8.04793400 |
| H | -6.05405020 | -3.18006566 | -8.54778000 |
| O | 3.85462377  | 6.36942502  | -8.04793400 |
| H | 3.02863380  | 6.13120859  | -8.54778000 |
| C | -1.70686093 | -7.28150778 | -4.68820600 |

|   |             |             |             |
|---|-------------|-------------|-------------|
| O | -2.93827570 | -7.24906263 | -4.78931900 |
| C | -5.66084238 | -4.88759586 | -4.68820600 |
| O | -6.63800708 | -4.13753974 | -4.78931900 |
| C | 2.89908339  | -6.89413122 | -4.68820600 |
| O | 1.88377713  | -7.59168998 | -4.78931900 |
| C | 7.45257446  | 0.62678844  | -4.68820600 |
| O | 7.80224537  | -0.55438271 | -4.78931900 |
| C | 6.39767639  | -3.87343086 | -4.68820600 |
| O | 5.98629112  | -5.03454980 | -4.78931900 |
| H | 4.65902807  | -6.20131365 | -5.48160400 |
| H | 0.12419218  | -7.75547611 | -5.48160400 |
| H | -4.45808090 | -6.34731031 | -5.48160400 |
| H | 7.33751860  | 2.51468770  | -5.48160400 |
| H | 7.41427359  | -2.27846014 | -5.48160400 |
| C | 3.16578085  | -6.04525646 | -3.44388800 |
| H | 2.45259053  | -5.20722530 | -3.48673900 |
| H | 4.17473912  | -5.63574611 | -3.46573800 |
| C | -0.99214209 | -6.75151450 | -3.44388800 |
| H | -1.07654282 | -5.65433031 | -3.48673900 |
| H | 0.06482645  | -7.01326446 | -3.46573800 |
| C | -4.77110046 | -4.87892349 | -3.44388800 |
| H | -4.19447340 | -3.94167332 | -3.48673900 |
| H | -4.06984772 | -5.71195417 | -3.46573800 |
| C | 6.72766063  | 1.14274952  | -3.44388800 |
| H | 5.71025771  | 0.72343109  | -3.48673900 |
| H | 6.64997840  | 2.22887152  | -3.46573800 |
| C | 6.11448310  | -3.02991592 | -3.44388800 |
| H | 5.04491766  | -2.77113722 | -3.48673900 |
| H | 6.69004334  | -2.10556429 | -3.46573800 |
| C | -0.74371821 | -7.82216105 | -1.27092300 |
| O | 0.46887655  | -7.98023936 | -1.43337700 |
| C | -5.19943158 | -5.89111463 | -1.27092300 |
| O | -4.31133791 | -6.73174798 | -1.43337700 |
| C | 3.99607024  | -6.76540782 | -1.27092300 |
| O | 5.06999610  | -6.18055055 | -1.43337700 |
| C | 7.66913881  | 1.70986265  | -1.27092300 |

|   |             |             |             |
|---|-------------|-------------|-------------|
| O | 7.44476783  | 2.91195768  | -1.43337700 |
| C | 7.20949567  | -3.12449875 | -1.27092300 |
| O | 7.73454947  | -2.02010149 | -1.43337700 |
| N | -1.54843576 | -7.24904008 | -2.20194200 |
| N | -5.51358969 | -4.95444891 | -2.20194200 |
| N | 3.00816801  | -6.77474432 | -2.20194200 |
| N | 7.37273977  | 0.76742666  | -2.20194200 |
| N | 6.41575384  | -3.71272649 | -2.20194200 |
| H | -2.54233466 | -7.10625092 | -2.00987900 |
| H | -6.23374144 | -4.25473094 | -2.00987900 |
| H | 2.12015754  | -7.24342458 | -2.00987900 |
| H | 7.54407086  | -0.22195165 | -2.00987900 |
| H | 5.97282163  | -4.61385625 | -2.00987900 |
| N | 7.06999375  | -3.22257783 | -5.66469200 |
| N | 3.82556137  | -6.76275829 | -5.66469200 |
| N | -0.88010543 | -7.71979494 | -5.66469200 |
| N | -5.24960186 | -5.72813231 | -5.66469200 |
| N | 7.61392881  | 1.54851783  | -5.66469200 |
| C | -1.35440432 | -8.09087750 | -6.99044600 |
| H | -1.09842788 | -9.13478982 | -7.20863100 |
| H | -2.43462939 | -7.96712894 | -7.01822900 |
| C | 3.65996236  | -7.34175628 | -6.99044600 |
| H | 4.48064792  | -8.03583991 | -7.20863100 |
| H | 2.71330434  | -7.87658196 | -7.01822900 |
| C | 7.27634781  | -3.78833370 | -6.99044600 |
| H | 6.82484804  | -4.77744838 | -7.01822900 |
| H | 8.34826850  | -3.86747229 | -7.20863100 |
| C | 8.11341572  | 1.21210359  | -6.99044600 |
| H | 9.02713426  | 1.77813830  | -7.20863100 |
| H | 8.32953175  | 0.14650809  | -7.01822900 |
| C | -5.85143458 | -5.74955851 | -6.99044600 |
| H | -6.25794156 | -6.74456049 | -7.20863100 |
| H | -6.65261745 | -5.01450346 | -7.01822900 |
| C | 3.67454331  | -6.22106469 | -8.03009300 |
| O | 2.73165122  | -5.87744996 | -8.72727800 |
| C | -0.68388209 | -7.19278942 | -8.03009300 |

|   |             |             |             |
|---|-------------|-------------|-------------|
| O | -1.24472615 | -6.36058121 | -8.72727800 |
| C | 6.62941806  | -2.87310469 | -8.03009300 |
| O | 5.66463067  | -3.14933260 | -8.72727800 |
| C | 7.05208044  | 1.57228365  | -8.03009300 |
| O | 6.43391374  | 0.78172277  | -8.72727800 |
| C | -4.78108778 | -5.41711307 | -8.03009300 |
| O | -4.74566044 | -4.41418662 | -8.72727800 |
| O | 7.24882743  | -1.69770448 | -8.04793400 |
| H | 6.76702520  | -0.98575426 | -8.54778000 |
| O | 4.86653892  | -5.63422563 | -8.04793400 |
| H | 4.89522657  | -4.77504956 | -8.54778000 |
| O | 0.62539796  | -7.41866409 | -8.04793400 |
| H | 1.15361777  | -6.74043823 | -8.54778000 |
| O | 6.86231023  | 2.88728209  | -8.04793400 |
| H | 6.05405020  | 3.18006566  | -8.54778000 |
| O | -3.85462377 | -6.36942502 | -8.04793400 |
| H | -3.02863380 | -6.13120859 | -8.54778000 |

**[P-CH<sub>2</sub>-P]<sub>12</sub>**

|   |             |             |            |
|---|-------------|-------------|------------|
| C | -4.49180000 | -7.79280900 | 4.67280000 |
| O | -5.65710600 | -7.39227500 | 4.76946800 |
| C | 0.00639200  | -8.99467100 | 4.67280000 |
| O | -1.20306000 | -9.23045100 | 4.76946800 |
| H | 1.89231000  | -9.05548500 | 5.47588700 |
| H | -2.88895400 | -8.78843500 | 5.47588700 |
| C | 0.59358700  | -8.34177600 | 3.42051300 |
| H | 0.26785200  | -7.29022600 | 3.44374300 |
| H | 1.68226300  | -8.36281200 | 3.44699400 |
| C | -3.65682700 | -7.52098300 | 3.42051300 |
| H | -3.41314600 | -6.44744700 | 3.44374300 |
| H | -2.72452300 | -8.08353900 | 3.44699400 |
| C | -3.75260500 | -8.65744700 | 1.26833200 |
| O | -2.64451200 | -9.17297300 | 1.43534100 |
| C | 1.07887200  | -9.37387100 | 1.26833200 |
| O | 2.29627200  | -9.26628400 | 1.43534100 |
| N | -4.34252900 | -7.85156700 | 2.18735900 |
| N | 0.16504300  | -8.97092100 | 2.18735900 |

|   |             |              |             |
|---|-------------|--------------|-------------|
| H | -5.25398800 | -7.43003300  | 1.99700700  |
| H | -0.83507000 | -9.06159100  | 1.99700700  |
| N | 0.90173200  | -9.22489700  | 5.65944200  |
| N | -3.83152600 | -8.43986200  | 5.65944200  |
| C | -4.39287700 | -8.63150400  | 6.98894400  |
| H | -4.46699700 | -9.70090900  | 7.22123200  |
| H | -5.38317500 | -8.18346200  | 7.01523600  |
| C | 0.51140900  | -9.67154000  | 6.98894400  |
| H | 0.98192100  | -10.63473200 | 7.22123200  |
| H | -0.57023500 | -9.77867300  | 7.01523600  |
| C | 0.97168000  | -8.63961900  | 8.01889300  |
| O | 0.24720900  | -7.93373100  | 8.70267700  |
| C | -3.47831000 | -7.96797000  | 8.01889300  |
| O | -3.75277600 | -6.99441700  | 8.70267700  |
| O | 2.30135200  | -8.59198200  | 8.04300800  |
| H | 2.68208200  | -7.82533300  | 8.54361700  |
| O | -2.30296100 | -8.59155100  | 8.04300800  |
| H | -1.58991500 | -8.11797800  | 8.54361700  |
| C | -4.49167500 | -7.79387200  | -4.67299800 |
| O | -5.65692900 | -7.39329900  | -4.76993100 |
| C | 0.00703100  | -8.99552900  | -4.67299800 |
| O | -1.20239500 | -9.23124900  | -4.76993100 |
| H | 1.89307400  | -9.05634600  | -5.47572300 |
| H | -2.88872300 | -8.78956300  | -5.47572300 |
| C | 0.59412200  | -8.34252400  | -3.42074600 |
| H | 0.26893600  | -7.29080400  | -3.44442100 |
| H | 1.68279000  | -8.36409400  | -3.44701300 |
| C | -3.65673700 | -7.52189900  | -3.42074600 |
| H | -3.41249700 | -6.44848900  | -3.44442100 |
| H | -2.72470800 | -8.08491300  | -3.44701300 |
| C | -3.75278100 | -8.65761100  | -1.26825100 |
| O | -2.64472000 | -9.17329100  | -1.43510800 |
| C | 1.07880100  | -9.37410200  | -1.26825100 |
| O | 2.29625100  | -9.26666300  | -1.43510800 |
| C | 0.49436200  | -10.00345400 | 0.00004600  |
| H | -0.59857300 | -9.97280200  | 0.00026800  |



|   |             |              |             |
|---|-------------|--------------|-------------|
| H | 0.81243400  | -11.05344200 | 0.00019800  |
| C | -4.57359700 | -8.91042700  | 0.00004600  |
| H | -5.50478100 | -8.33741400  | 0.00026800  |
| H | -4.82313200 | -9.97877900  | 0.00019800  |
| N | -4.34249700 | -7.85175400  | -2.18746400 |
| N | 0.16516400  | -8.97106700  | -2.18746400 |
| H | -5.25412800 | -7.43040600  | -1.99752000 |
| H | -0.83500600 | -9.06198400  | -1.99752000 |
| N | 0.90256300  | -9.22590300  | -5.65943400 |
| N | -3.83130900 | -8.44114800  | -5.65943400 |
| C | -4.39233600 | -8.63268300  | -6.98908700 |
| H | -4.46616700 | -9.70206200  | -7.22156200 |
| H | -5.38272100 | -8.18483700  | -7.01550400 |
| C | 0.51246700  | -9.67229100  | -6.98908700 |
| H | 0.98321800  | -10.63531600 | -7.22156200 |
| H | -0.56915500 | -9.77963700  | -7.01550400 |
| C | 0.97262100  | -8.63998600  | -8.01870800 |
| O | 0.24809300  | -7.93380300  | -8.70211600 |
| C | -3.47767900 | -7.96875700  | -8.01870800 |
| O | -3.75204700 | -6.99492200  | -8.70211600 |
| O | 2.30231500  | -8.59235600  | -8.04295000 |
| H | 2.68289000  | -7.82548100  | -8.54330000 |
| O | -2.30231500 | -8.59235600  | -8.04295000 |
| H | -1.58929000 | -8.11851000  | -8.54330000 |
| C | 4.50287100  | -7.78641800  | 4.67280000  |
| O | 3.57334500  | -8.59533500  | 4.76946800  |
| C | 7.79280900  | -4.49180000  | 4.67280000  |
| O | 7.39227500  | -5.65710600  | 4.76946800  |
| H | 8.78843500  | -2.88895400  | 5.47588700  |
| H | 6.16653100  | -6.89612600  | 5.47588700  |
| C | 7.52098300  | -3.65682700  | 3.42051300  |
| H | 6.44744700  | -3.41314600  | 3.44374300  |
| H | 8.08353900  | -2.72452300  | 3.44699400  |
| C | 4.68494900  | -6.92739600  | 3.42051300  |
| H | 3.87708000  | -6.17959500  | 3.44374300  |
| H | 5.63828900  | -6.40127600  | 3.44699400  |

|   |            |             |             |
|---|------------|-------------|-------------|
| C | 5.62126600 | -7.57857400 | 1.26833200  |
| O | 6.62177200 | -6.87670100 | 1.43534100  |
| C | 8.65744700 | -3.75260500 | 1.26833200  |
| O | 9.17297300 | -2.64451200 | 1.43534100  |
| N | 4.62839200 | -7.68652400 | 2.18735900  |
| N | 7.85156700 | -4.34252900 | 2.18735900  |
| H | 3.80760300 | -8.26510300 | 1.99700700  |
| H | 7.43003300 | -5.25398800 | 1.99700700  |
| N | 8.43986200 | -3.83152600 | 5.65944200  |
| N | 5.39337200 | -7.53812900 | 5.65944200  |
| C | 5.27866300 | -8.12009500 | 6.98894400  |
| H | 6.16773500 | -8.71898800 | 7.22123200  |
| H | 4.39549800 | -8.75369700 | 7.01523600  |
| C | 8.63150400 | -4.39287700 | 6.98894400  |
| H | 9.70090900 | -4.46699700 | 7.22123200  |
| H | 8.18346200 | -5.38317500 | 7.01523600  |
| C | 7.96797000 | -3.47831000 | 8.01889300  |
| O | 6.99441700 | -3.75277600 | 8.70267700  |
| C | 5.16130900 | -6.99629000 | 8.01889300  |
| O | 4.18095400 | -6.74720800 | 8.70267700  |
| O | 8.59155100 | -2.30296100 | 8.04300800  |
| H | 8.11797800 | -1.58991500 | 8.54361700  |
| O | 6.28902100 | -6.29019800 | 8.04300800  |
| H | 6.23541800 | -5.43589600 | 8.54361700  |
| C | 4.50385300 | -7.78684100 | -4.67299800 |
| O | 3.57432000 | -8.59569300 | -4.76993100 |
| C | 7.79387200 | -4.49167500 | -4.67299800 |
| O | 7.39329900 | -5.65692900 | -4.76993100 |
| H | 8.78956300 | -2.88872300 | -5.47572300 |
| H | 6.16762400 | -6.89648900 | -5.47572300 |
| C | 7.52189900 | -3.65673700 | -3.42074600 |
| H | 6.44848900 | -3.41249700 | -3.44442100 |
| H | 8.08491300 | -2.72470800 | -3.44701300 |
| C | 4.68578700 | -6.92777700 | -3.42074600 |
| H | 3.87830700 | -6.17955400 | -3.44442100 |
| H | 5.63938600 | -6.40212300 | -3.44701300 |

|   |            |             |             |
|---|------------|-------------|-------------|
| C | 5.62132000 | -7.57881000 | -1.26825100 |
| O | 6.62194300 | -6.87704000 | -1.43510800 |
| C | 8.65761100 | -3.75278100 | -1.26825100 |
| O | 9.17329100 | -2.64472000 | -1.43510800 |
| C | 8.91042700 | -4.57359700 | 0.00004600  |
| H | 8.33741400 | -5.50478100 | 0.00026800  |
| H | 9.97877900 | -4.82313200 | 0.00019800  |
| C | 5.42985800 | -8.41606500 | 0.00004600  |
| H | 4.46802200 | -8.93598700 | 0.00026800  |
| H | 6.23031000 | -9.16634400 | 0.00019800  |
| N | 4.62856900 | -7.68659000 | -2.18746400 |
| N | 7.85175400 | -4.34249700 | -2.18746400 |
| H | 3.80785600 | -8.26541200 | -1.99752000 |
| H | 7.43040600 | -5.25412800 | -1.99752000 |
| N | 8.44114800 | -3.83130900 | -5.65943400 |
| N | 5.39459400 | -7.53858500 | -5.65943400 |
| C | 5.27995500 | -8.12021600 | -6.98908700 |
| H | 6.16914900 | -8.71884500 | -7.22156200 |
| H | 4.39691600 | -8.75399200 | -7.01550400 |
| C | 8.63268300 | -4.39233600 | -6.98908700 |
| H | 9.70206200 | -4.46616700 | -7.22156200 |
| H | 8.18483700 | -5.38272100 | -7.01550400 |
| C | 7.96875700 | -3.47767900 | -8.01870800 |
| O | 6.99492200 | -3.75204700 | -8.70211600 |
| C | 5.16230700 | -6.99613700 | -8.01870800 |
| O | 4.18175600 | -6.74682900 | -8.70211600 |
| O | 8.59235600 | -2.30231500 | -8.04295000 |
| H | 8.11851000 | -1.58929000 | -8.54330000 |
| O | 6.29004100 | -6.29004100 | -8.04295000 |
| H | 6.23619100 | -5.43562000 | -8.54330000 |
| C | 8.99467100 | 0.00639200  | 4.67280000  |
| O | 9.23045100 | -1.20306000 | 4.76946800  |
| C | 7.78641800 | 4.50287100  | 4.67280000  |
| O | 8.59533500 | 3.57334500  | 4.76946800  |
| H | 6.89612600 | 6.16653100  | 5.47588700  |
| H | 9.05548500 | 1.89231000  | 5.47588700  |

|   |             |             |             |
|---|-------------|-------------|-------------|
| C | 6.92739600  | 4.68494900  | 3.42051300  |
| H | 6.17959500  | 3.87708000  | 3.44374300  |
| H | 6.40127600  | 5.63828900  | 3.44699400  |
| C | 8.34177600  | 0.59358700  | 3.42051300  |
| H | 7.29022600  | 0.26785200  | 3.44374300  |
| H | 8.36281200  | 1.68226300  | 3.44699400  |
| C | 9.37387100  | 1.07887200  | 1.26833200  |
| O | 9.26628400  | 2.29627200  | 1.43534100  |
| C | 7.57857400  | 5.62126600  | 1.26833200  |
| O | 6.87670100  | 6.62177200  | 1.43534100  |
| N | 8.97092100  | 0.16504300  | 2.18735900  |
| N | 7.68652400  | 4.62839200  | 2.18735900  |
| H | 9.06159100  | -0.83507000 | 1.99700700  |
| H | 8.26510300  | 3.80760300  | 1.99700700  |
| N | 7.53812900  | 5.39337200  | 5.65944200  |
| N | 9.22489700  | 0.90173200  | 5.65944200  |
| C | 9.67154000  | 0.51140900  | 6.98894400  |
| H | 10.63473200 | 0.98192100  | 7.22123200  |
| H | 9.77867300  | -0.57023500 | 7.01523600  |
| C | 8.12009500  | 5.27866300  | 6.98894400  |
| H | 8.71898800  | 6.16773500  | 7.22123200  |
| H | 8.75369700  | 4.39549800  | 7.01523600  |
| C | 6.99629000  | 5.16130900  | 8.01889300  |
| O | 6.74720800  | 4.18095400  | 8.70267700  |
| C | 8.63961900  | 0.97168000  | 8.01889300  |
| O | 7.93373100  | 0.24720900  | 8.70267700  |
| O | 6.29019800  | 6.28902100  | 8.04300800  |
| H | 5.43589600  | 6.23541800  | 8.54361700  |
| O | 8.59198200  | 2.30135200  | 8.04300800  |
| H | 7.82533300  | 2.68208200  | 8.54361700  |
| C | 8.99552900  | 0.00703100  | -4.67299800 |
| O | 9.23124900  | -1.20239500 | -4.76993100 |
| C | 7.78684100  | 4.50385300  | -4.67299800 |
| O | 8.59569300  | 3.57432000  | -4.76993100 |
| H | 6.89648900  | 6.16762400  | -5.47572300 |
| H | 9.05634600  | 1.89307400  | -5.47572300 |

|   |             |             |             |
|---|-------------|-------------|-------------|
| C | 6.92777700  | 4.68578700  | -3.42074600 |
| H | 6.17955400  | 3.87830700  | -3.44442100 |
| H | 6.40212300  | 5.63938600  | -3.44701300 |
| C | 8.34252400  | 0.59412200  | -3.42074600 |
| H | 7.29080400  | 0.26893600  | -3.44442100 |
| H | 8.36409400  | 1.68279000  | -3.44701300 |
| C | 9.37410200  | 1.07880100  | -1.26825100 |
| O | 9.26666300  | 2.29625100  | -1.43510800 |
| C | 7.57881000  | 5.62132000  | -1.26825100 |
| O | 6.87704000  | 6.62194300  | -1.43510800 |
| C | 8.41606500  | 5.42985800  | 0.00004600  |
| H | 8.93598700  | 4.46802200  | 0.00026800  |
| H | 9.16634400  | 6.23031000  | 0.00019800  |
| C | 10.00345400 | 0.49436200  | 0.00004600  |
| H | 9.97280200  | -0.59857300 | 0.00026800  |
| H | 11.05344200 | 0.81243400  | 0.00019800  |
| N | 8.97106700  | 0.16516400  | -2.18746400 |
| N | 7.68659000  | 4.62856900  | -2.18746400 |
| H | 9.06198400  | -0.83500600 | -1.99752000 |
| H | 8.26541200  | 3.80785600  | -1.99752000 |
| N | 7.53858500  | 5.39459400  | -5.65943400 |
| N | 9.22590300  | 0.90256300  | -5.65943400 |
| C | 9.67229100  | 0.51246700  | -6.98908700 |
| H | 10.63531600 | 0.98321800  | -7.22156200 |
| H | 9.77963700  | -0.56915500 | -7.01550400 |
| C | 8.12021600  | 5.27995500  | -6.98908700 |
| H | 8.71884500  | 6.16914900  | -7.22156200 |
| H | 8.75399200  | 4.39691600  | -7.01550400 |
| C | 6.99613700  | 5.16230700  | -8.01870800 |
| O | 6.74682900  | 4.18175600  | -8.70211600 |
| C | 8.63998600  | 0.97262100  | -8.01870800 |
| O | 7.93380300  | 0.24809300  | -8.70211600 |
| O | 6.29004100  | 6.29004100  | -8.04295000 |
| H | 5.43562000  | 6.23619100  | -8.54330000 |
| O | 8.59235600  | 2.30231500  | -8.04295000 |
| H | 7.82548100  | 2.68289000  | -8.54330000 |

|   |             |             |            |
|---|-------------|-------------|------------|
| C | 4.49180000  | 7.79280900  | 4.67280000 |
| O | 5.65710600  | 7.39227500  | 4.76946800 |
| C | -0.00639200 | 8.99467100  | 4.67280000 |
| O | 1.20306000  | 9.23045100  | 4.76946800 |
| H | -1.89231000 | 9.05548500  | 5.47588700 |
| H | 2.88895400  | 8.78843500  | 5.47588700 |
| C | -0.59358700 | 8.34177600  | 3.42051300 |
| H | -0.26785200 | 7.29022600  | 3.44374300 |
| H | -1.68226300 | 8.36281200  | 3.44699400 |
| C | 3.65682700  | 7.52098300  | 3.42051300 |
| H | 3.41314600  | 6.44744700  | 3.44374300 |
| H | 2.72452300  | 8.08353900  | 3.44699400 |
| C | 3.75260500  | 8.65744700  | 1.26833200 |
| O | 2.64451200  | 9.17297300  | 1.43534100 |
| C | -1.07887200 | 9.37387100  | 1.26833200 |
| O | -2.29627200 | 9.26628400  | 1.43534100 |
| N | 4.34252900  | 7.85156700  | 2.18735900 |
| N | -0.16504300 | 8.97092100  | 2.18735900 |
| H | 5.25398800  | 7.43003300  | 1.99700700 |
| H | 0.83507000  | 9.06159100  | 1.99700700 |
| N | -0.90173200 | 9.22489700  | 5.65944200 |
| N | 3.83152600  | 8.43986200  | 5.65944200 |
| C | 4.39287700  | 8.63150400  | 6.98894400 |
| H | 4.46699700  | 9.70090900  | 7.22123200 |
| H | 5.38317500  | 8.18346200  | 7.01523600 |
| C | -0.51140900 | 9.67154000  | 6.98894400 |
| H | -0.98192100 | 10.63473200 | 7.22123200 |
| H | 0.57023500  | 9.77867300  | 7.01523600 |
| C | -0.97168000 | 8.63961900  | 8.01889300 |
| O | -0.24720900 | 7.93373100  | 8.70267700 |
| C | 3.47831000  | 7.96797000  | 8.01889300 |
| O | 3.75277600  | 6.99441700  | 8.70267700 |
| O | -2.30135200 | 8.59198200  | 8.04300800 |
| H | -2.68208200 | 7.82533300  | 8.54361700 |
| O | 2.30296100  | 8.59155100  | 8.04300800 |
| H | 1.58991500  | 8.11797800  | 8.54361700 |

|   |             |             |             |
|---|-------------|-------------|-------------|
| C | 4.49167500  | 7.79387200  | -4.67299800 |
| O | 5.65692900  | 7.39329900  | -4.76993100 |
| C | -0.00703100 | 8.99552900  | -4.67299800 |
| O | 1.20239500  | 9.23124900  | -4.76993100 |
| H | -1.89307400 | 9.05634600  | -5.47572300 |
| H | 2.88872300  | 8.78956300  | -5.47572300 |
| C | -0.59412200 | 8.34252400  | -3.42074600 |
| H | -0.26893600 | 7.29080400  | -3.44442100 |
| H | -1.68279000 | 8.36409400  | -3.44701300 |
| C | 3.65673700  | 7.52189900  | -3.42074600 |
| H | 3.41249700  | 6.44848900  | -3.44442100 |
| H | 2.72470800  | 8.08491300  | -3.44701300 |
| C | 3.75278100  | 8.65761100  | -1.26825100 |
| O | 2.64472000  | 9.17329100  | -1.43510800 |
| C | -1.07880100 | 9.37410200  | -1.26825100 |
| O | -2.29625100 | 9.26666300  | -1.43510800 |
| C | -0.49436200 | 10.00345400 | 0.00004600  |
| H | 0.59857300  | 9.97280200  | 0.00026800  |
| H | -0.81243400 | 11.05344200 | 0.00019800  |
| C | 4.57359700  | 8.91042700  | 0.00004600  |
| H | 5.50478100  | 8.33741400  | 0.00026800  |
| H | 4.82313200  | 9.97877900  | 0.00019800  |
| N | 4.34249700  | 7.85175400  | -2.18746400 |
| N | -0.16516400 | 8.97106700  | -2.18746400 |
| H | 5.25412800  | 7.43040600  | -1.99752000 |
| H | 0.83500600  | 9.06198400  | -1.99752000 |
| N | -0.90256300 | 9.22590300  | -5.65943400 |
| N | 3.83130900  | 8.44114800  | -5.65943400 |
| C | 4.39233600  | 8.63268300  | -6.98908700 |
| H | 4.46616700  | 9.70206200  | -7.22156200 |
| H | 5.38272100  | 8.18483700  | -7.01550400 |
| C | -0.51246700 | 9.67229100  | -6.98908700 |
| H | -0.98321800 | 10.63531600 | -7.22156200 |
| H | 0.56915500  | 9.77963700  | -7.01550400 |
| C | -0.97262100 | 8.63998600  | -8.01870800 |
| O | -0.24809300 | 7.93380300  | -8.70211600 |

|   |             |            |             |
|---|-------------|------------|-------------|
| C | 3.47767900  | 7.96875700 | -8.01870800 |
| O | 3.75204700  | 6.99492200 | -8.70211600 |
| O | -2.30231500 | 8.59235600 | -8.04295000 |
| H | -2.68289000 | 7.82548100 | -8.54330000 |
| O | 2.30231500  | 8.59235600 | -8.04295000 |
| H | 1.58929000  | 8.11851000 | -8.54330000 |
| C | -4.50287100 | 7.78641800 | 4.67280000  |
| O | -3.57334500 | 8.59533500 | 4.76946800  |
| C | -7.79280900 | 4.49180000 | 4.67280000  |
| O | -7.39227500 | 5.65710600 | 4.76946800  |
| H | -8.78843500 | 2.88895400 | 5.47588700  |
| H | -6.16653100 | 6.89612600 | 5.47588700  |
| C | -7.52098300 | 3.65682700 | 3.42051300  |
| H | -6.44744700 | 3.41314600 | 3.44374300  |
| H | -8.08353900 | 2.72452300 | 3.44699400  |
| C | -4.68494900 | 6.92739600 | 3.42051300  |
| H | -3.87708000 | 6.17959500 | 3.44374300  |
| H | -5.63828900 | 6.40127600 | 3.44699400  |
| C | -5.62126600 | 7.57857400 | 1.26833200  |
| O | -6.62177200 | 6.87670100 | 1.43534100  |
| C | -8.65744700 | 3.75260500 | 1.26833200  |
| O | -9.17297300 | 2.64451200 | 1.43534100  |
| N | -4.62839200 | 7.68652400 | 2.18735900  |
| N | -7.85156700 | 4.34252900 | 2.18735900  |
| H | -3.80760300 | 8.26510300 | 1.99700700  |
| H | -7.43003300 | 5.25398800 | 1.99700700  |
| N | -8.43986200 | 3.83152600 | 5.65944200  |
| N | -5.39337200 | 7.53812900 | 5.65944200  |
| C | -5.27866300 | 8.12009500 | 6.98894400  |
| H | -6.16773500 | 8.71898800 | 7.22123200  |
| H | -4.39549800 | 8.75369700 | 7.01523600  |
| C | -8.63150400 | 4.39287700 | 6.98894400  |
| H | -9.70090900 | 4.46699700 | 7.22123200  |
| H | -8.18346200 | 5.38317500 | 7.01523600  |
| C | -7.96797000 | 3.47831000 | 8.01889300  |
| O | -6.99441700 | 3.75277600 | 8.70267700  |



|   |             |            |             |
|---|-------------|------------|-------------|
| C | -5.16130900 | 6.99629000 | 8.01889300  |
| O | -4.18095400 | 6.74720800 | 8.70267700  |
| O | -8.59155100 | 2.30296100 | 8.04300800  |
| H | -8.11797800 | 1.58991500 | 8.54361700  |
| O | -6.28902100 | 6.29019800 | 8.04300800  |
| H | -6.23541800 | 5.43589600 | 8.54361700  |
| C | -4.50385300 | 7.78684100 | -4.67299800 |
| O | -3.57432000 | 8.59569300 | -4.76993100 |
| C | -7.79387200 | 4.49167500 | -4.67299800 |
| O | -7.39329900 | 5.65692900 | -4.76993100 |
| H | -8.78956300 | 2.88872300 | -5.47572300 |
| H | -6.16762400 | 6.89648900 | -5.47572300 |
| C | -7.52189900 | 3.65673700 | -3.42074600 |
| H | -6.44848900 | 3.41249700 | -3.44442100 |
| H | -8.08491300 | 2.72470800 | -3.44701300 |
| C | -4.68578700 | 6.92777700 | -3.42074600 |
| H | -3.87830700 | 6.17955400 | -3.44442100 |
| H | -5.63938600 | 6.40212300 | -3.44701300 |
| C | -5.62132000 | 7.57881000 | -1.26825100 |
| O | -6.62194300 | 6.87704000 | -1.43510800 |
| C | -8.65761100 | 3.75278100 | -1.26825100 |
| O | -9.17329100 | 2.64472000 | -1.43510800 |
| C | -8.91042700 | 4.57359700 | 0.00004600  |
| H | -8.33741400 | 5.50478100 | 0.00026800  |
| H | -9.97877900 | 4.82313200 | 0.00019800  |
| C | -5.42985800 | 8.41606500 | 0.00004600  |
| H | -4.46802200 | 8.93598700 | 0.00026800  |
| H | -6.23031000 | 9.16634400 | 0.00019800  |
| N | -4.62856900 | 7.68659000 | -2.18746400 |
| N | -7.85175400 | 4.34249700 | -2.18746400 |
| H | -3.80785600 | 8.26541200 | -1.99752000 |
| H | -7.43040600 | 5.25412800 | -1.99752000 |
| N | -8.44114800 | 3.83130900 | -5.65943400 |
| N | -5.39459400 | 7.53858500 | -5.65943400 |
| C | -5.27995500 | 8.12021600 | -6.98908700 |
| H | -6.16914900 | 8.71884500 | -7.22156200 |

|   |              |             |             |
|---|--------------|-------------|-------------|
| H | -4.39691600  | 8.75399200  | -7.01550400 |
| C | -8.63268300  | 4.39233600  | -6.98908700 |
| H | -9.70206200  | 4.46616700  | -7.22156200 |
| H | -8.18483700  | 5.38272100  | -7.01550400 |
| C | -7.96875700  | 3.47767900  | -8.01870800 |
| O | -6.99492200  | 3.75204700  | -8.70211600 |
| C | -5.16230700  | 6.99613700  | -8.01870800 |
| O | -4.18175600  | 6.74682900  | -8.70211600 |
| O | -8.59235600  | 2.30231500  | -8.04295000 |
| H | -8.11851000  | 1.58929000  | -8.54330000 |
| O | -6.29004100  | 6.29004100  | -8.04295000 |
| H | -6.23619100  | 5.43562000  | -8.54330000 |
| C | -8.99467100  | -0.00639200 | 4.67280000  |
| O | -9.23045100  | 1.20306000  | 4.76946800  |
| C | -7.78641800  | -4.50287100 | 4.67280000  |
| O | -8.59533500  | -3.57334500 | 4.76946800  |
| H | -6.89612600  | -6.16653100 | 5.47588700  |
| H | -9.05548500  | -1.89231000 | 5.47588700  |
| C | -6.92739600  | -4.68494900 | 3.42051300  |
| H | -6.17959500  | -3.87708000 | 3.44374300  |
| H | -6.40127600  | -5.63828900 | 3.44699400  |
| C | -8.34177600  | -0.59358700 | 3.42051300  |
| H | -7.29022600  | -0.26785200 | 3.44374300  |
| H | -8.36281200  | -1.68226300 | 3.44699400  |
| C | -9.37387100  | -1.07887200 | 1.26833200  |
| O | -9.26628400  | -2.29627200 | 1.43534100  |
| C | -7.57857400  | -5.62126600 | 1.26833200  |
| O | -6.87670100  | -6.62177200 | 1.43534100  |
| N | -8.97092100  | -0.16504300 | 2.18735900  |
| N | -7.68652400  | -4.62839200 | 2.18735900  |
| H | -9.06159100  | 0.83507000  | 1.99700700  |
| H | -8.26510300  | -3.80760300 | 1.99700700  |
| N | -7.53812900  | -5.39337200 | 5.65944200  |
| N | -9.22489700  | -0.90173200 | 5.65944200  |
| C | -9.67154000  | -0.51140900 | 6.98894400  |
| H | -10.63473200 | -0.98192100 | 7.22123200  |

|   |              |             |             |
|---|--------------|-------------|-------------|
| H | -9.77867300  | 0.57023500  | 7.01523600  |
| C | -8.12009500  | -5.27866300 | 6.98894400  |
| H | -8.71898800  | -6.16773500 | 7.22123200  |
| H | -8.75369700  | -4.39549800 | 7.01523600  |
| C | -6.99629000  | -5.16130900 | 8.01889300  |
| O | -6.74720800  | -4.18095400 | 8.70267700  |
| C | -8.63961900  | -0.97168000 | 8.01889300  |
| O | -7.93373100  | -0.24720900 | 8.70267700  |
| O | -6.29019800  | -6.28902100 | 8.04300800  |
| H | -5.43589600  | -6.23541800 | 8.54361700  |
| O | -8.59198200  | -2.30135200 | 8.04300800  |
| H | -7.82533300  | -2.68208200 | 8.54361700  |
| C | -8.99552900  | -0.00703100 | -4.67299800 |
| O | -9.23124900  | 1.20239500  | -4.76993100 |
| C | -7.78684100  | -4.50385300 | -4.67299800 |
| O | -8.59569300  | -3.57432000 | -4.76993100 |
| H | -6.89648900  | -6.16762400 | -5.47572300 |
| H | -9.05634600  | -1.89307400 | -5.47572300 |
| C | -6.92777700  | -4.68578700 | -3.42074600 |
| H | -6.17955400  | -3.87830700 | -3.44442100 |
| H | -6.40212300  | -5.63938600 | -3.44701300 |
| C | -8.34252400  | -0.59412200 | -3.42074600 |
| H | -7.29080400  | -0.26893600 | -3.44442100 |
| H | -8.36409400  | -1.68279000 | -3.44701300 |
| C | -9.37410200  | -1.07880100 | -1.26825100 |
| O | -9.26666300  | -2.29625100 | -1.43510800 |
| C | -7.57881000  | -5.62132000 | -1.26825100 |
| O | -6.87704000  | -6.62194300 | -1.43510800 |
| C | -8.41606500  | -5.42985800 | 0.00004600  |
| H | -8.93598700  | -4.46802200 | 0.00026800  |
| H | -9.16634400  | -6.23031000 | 0.00019800  |
| C | -10.00345400 | -0.49436200 | 0.00004600  |
| H | -9.97280200  | 0.59857300  | 0.00026800  |
| H | -11.05344200 | -0.81243400 | 0.00019800  |
| N | -8.97106700  | -0.16516400 | -2.18746400 |
| N | -7.68659000  | -4.62856900 | -2.18746400 |

|   |              |             |             |
|---|--------------|-------------|-------------|
| H | -9.06198400  | 0.83500600  | -1.99752000 |
| H | -8.26541200  | -3.80785600 | -1.99752000 |
| N | -7.53858500  | -5.39459400 | -5.65943400 |
| N | -9.22590300  | -0.90256300 | -5.65943400 |
| C | -9.67229100  | -0.51246700 | -6.98908700 |
| H | -10.63531600 | -0.98321800 | -7.22156200 |
| H | -9.77963700  | 0.56915500  | -7.01550400 |
| C | -8.12021600  | -5.27995500 | -6.98908700 |
| H | -8.71884500  | -6.16914900 | -7.22156200 |
| H | -8.75399200  | -4.39691600 | -7.01550400 |
| C | -6.99613700  | -5.16230700 | -8.01870800 |
| O | -6.74682900  | -4.18175600 | -8.70211600 |
| C | -8.63998600  | -0.97262100 | -8.01870800 |
| O | -7.93380300  | -0.24809300 | -8.70211600 |
| O | -6.29004100  | -6.29004100 | -8.04295000 |
| H | -5.43562000  | -6.23619100 | -8.54330000 |
| O | -8.59235600  | -2.30231500 | -8.04295000 |
| H | -7.82548100  | -2.68289000 | -8.54330000 |

**[P-CH<sub>2</sub>-P]<sub>12</sub>**

|   |             |             |             |
|---|-------------|-------------|-------------|
| C | 5.79492700  | 10.54102000 | -4.64656595 |
| O | 4.83322800  | 11.31199000 | -4.73773095 |
| C | 9.38768816  | 7.52101008  | -4.64656595 |
| O | 8.79423159  | 8.60131975  | -4.73773095 |
| H | 10.62899100 | 6.10908600  | -5.46417495 |
| H | 7.48206124  | 9.71159828  | -5.46417495 |
| C | 9.29016000  | 6.66632700  | -3.38234195 |
| H | 8.27161900  | 6.24849000  | -3.37533495 |
| H | 9.99883900  | 5.83982400  | -3.41540195 |
| C | 6.03189578  | 9.71407339  | -3.38234195 |
| H | 5.25078589  | 8.93826357  | -3.37533495 |
| H | 7.00291881  | 9.22168390  | -3.41540195 |
| C | 6.98247500  | 10.45001300 | -1.26311895 |
| O | 8.01028600  | 9.79061900  | -1.43694495 |
| C | 10.45001258 | 6.98247563  | -1.26311895 |
| O | 11.14724697 | 5.97994876  | -1.43694495 |
| C | 10.58145400 | 7.83855500  | 0.00077205  |

|   |             |             |             |
|---|-------------|-------------|-------------|
| H | 9.87688200  | 8.67439700  | 0.00038805  |
| H | 11.60220300 | 8.23959800  | 0.00066105  |
| C | 6.77630364  | 11.29122767 | 0.00077205  |
| H | 5.80550111  | 11.79381695 | 0.00038805  |
| H | 7.56588024  | 12.05236682 | 0.00066105  |
| N | 5.96860900  | 10.49648500 | -2.16369495 |
| N | 9.53110660  | 7.41339988  | -2.16369495 |
| H | 5.13693400  | 11.06029200 | -1.97735095 |
| H | 8.97849869  | 8.25255787  | -1.97735095 |
| N | 10.11067600 | 6.97019700  | -5.64711595 |
| N | 6.67366770  | 10.30881054 | -5.64711595 |
| C | 6.51674300  | 10.87414000 | -6.97890995 |
| H | 7.37330300  | 11.51385100 | -7.22556795 |
| H | 5.60436100  | 11.46427300 | -7.00159895 |
| C | 10.18203870 | 7.55254580  | -6.97890995 |
| H | 11.21820375 | 7.81577038  | -7.22556795 |
| H | 9.56494176  | 8.44691108  | -7.00159895 |
| C | 9.67903100  | 6.53741200  | -8.00532695 |
| O | 8.67375200  | 6.64039900  | -8.68736595 |
| C | 6.44049937  | 9.74378595  | -8.00532695 |
| O | 5.47233126  | 9.45422991  | -8.68736595 |
| O | 10.50083300 | 5.48657900  | -8.02987495 |
| H | 10.17409100 | 4.71273700  | -8.54890795 |
| O | 7.60188180  | 9.08743286  | -8.02987495 |
| H | 7.59614807  | 8.24745732  | -8.54890795 |
| C | 5.79209200  | 10.53928500 | 4.64683405  |
| O | 4.82916000  | 11.30869700 | 4.73842505  |
| C | 9.38440501  | 7.52049205  | 4.64683405  |
| O | 8.78921307  | 8.59983417  | 4.73842505  |
| H | 10.62791600 | 6.11008900  | 5.46315005  |
| H | 7.48068424  | 9.71211354  | 5.46315005  |
| C | 9.28665400  | 6.66601300  | 3.38243505  |
| H | 8.26760900  | 6.24951300  | 3.37494205  |
| H | 9.99437000  | 5.83866300  | 3.41533305  |
| C | 6.02877682  | 9.71244160  | 3.38243505  |
| H | 5.24668965  | 8.93767414  | 3.37494205  |

|   |             |             |             |
|---|-------------|-------------|-------------|
| H | 6.99923429  | 9.21890106  | 3.41533305  |
| C | 6.98195900  | 10.45058700 | 1.26504105  |
| O | 8.01055600  | 9.79277500  | 1.44017305  |
| C | 10.44975552 | 6.98320340  | 1.26504105  |
| O | 11.14832148 | 5.98183732  | 1.44017305  |
| N | 5.96651000  | 10.49512300 | 2.16386205  |
| N | 9.52864616  | 7.41294480  | 2.16386205  |
| H | 5.13575300  | 11.06022000 | 1.97732305  |
| H | 8.97738003  | 8.25294330  | 1.97732305  |
| N | 10.10923500 | 6.97091700  | 5.64661505  |
| N | 6.67206086  | 10.30892429 | 5.64661505  |
| C | 6.51497300  | 10.87336200 | 6.97877905  |
| H | 7.37206900  | 11.51198000 | 7.22622005  |
| H | 5.60306100  | 11.46426400 | 7.00144605  |
| C | 10.18010570 | 7.55250437  | 6.97877905  |
| H | 11.21634768 | 7.81451403  | 7.22622005  |
| H | 9.56373727  | 8.44740025  | 7.00144605  |
| C | 9.67567500  | 6.53649700  | 8.00373805  |
| O | 8.66821300  | 6.63758700  | 8.68287405  |
| C | 6.43774899  | 9.74165631  | 8.00373805  |
| O | 5.46829000  | 9.44951228  | 8.68287405  |
| O | 10.49904500 | 5.48691100  | 8.03012705  |
| H | 10.17120300 | 4.71116400  | 8.54573905  |
| O | 7.60010285  | 9.08705535  | 8.03012705  |
| H | 7.59408186  | 8.24489887  | 8.54573905  |
| C | 11.55125890 | 3.35599454  | -4.64656595 |
| O | 11.41639313 | 4.58117654  | -4.73773095 |
| C | 11.95625518 | -1.31994073 | -4.64656595 |
| O | 12.30051231 | -0.13640927 | -4.73773095 |
| H | 11.83560775 | -3.19605548 | -5.46417495 |
| H | 12.15775324 | 1.57652076  | -5.46417495 |
| C | 11.28294016 | -1.85533011 | -3.38234195 |
| H | 10.26726754 | -1.43056824 | -3.37533495 |
| H | 11.19962601 | -2.94086771 | -3.41540195 |
| C | 11.13408158 | 2.60369276  | -3.38234195 |
| H | 10.03317310 | 2.60744047  | -3.37533495 |

|   |             |             |             |
|---|-------------|-------------|-------------|
| H | 11.47252659 | 1.56890384  | -3.41540195 |
| C | 12.32663048 | 2.45191963  | -1.26311895 |
| O | 12.58714064 | 1.25888554  | -1.43694495 |
| C | 12.32663062 | -2.45191890 | -1.26311895 |
| O | 12.11075625 | -3.65383160 | -1.43694495 |
| C | 13.02491327 | -1.93952248 | 0.00077205  |
| H | 13.11773518 | -0.85028530 | 0.00038805  |
| H | 14.03027204 | -2.37772080 | 0.00066105  |
| C | 12.77567391 | 3.19253339  | 0.00077205  |
| H | 12.44459714 | 4.23437874  | 0.00038805  |
| H | 13.87219553 | 3.17242508  | 0.00066105  |
| N | 11.64257962 | 3.20169182  | -2.16369495 |
| N | 11.98157543 | -1.49744479 | -2.16369495 |
| H | 11.45316834 | 4.18844661  | -1.97735095 |
| H | 12.18419694 | -0.51331768 | -1.97735095 |
| N | 12.07800113 | -2.22065400 | -5.64711595 |
| N | 12.00842553 | 2.57043415  | -5.64711595 |
| C | 12.29721130 | 3.08114497  | -6.97890995 |
| H | 13.35523467 | 2.92780957  | -7.22556795 |
| H | 12.06934685 | 4.14358351  | -7.00159895 |
| C | 12.54024496 | -1.85933226 | -6.97890995 |
| H | 13.45905218 | -2.40588371 | -7.22556795 |
| H | 12.73630328 | -0.79056708 | -7.00159895 |
| C | 11.46675681 | -2.22146010 | -8.00532695 |
| O | 10.82874002 | -1.43779769 | -8.68736595 |
| C | 11.44401790 | 2.33577634  | -8.00532695 |
| O | 10.55467262 | 2.81562754  | -8.68736595 |
| O | 11.30480744 | -3.54561301 | -8.02987495 |
| H | 10.52657703 | -3.86176045 | -8.54890795 |
| O | 11.80112757 | 1.05044323  | -8.02987495 |
| H | 11.20312081 | 0.46054519  | -8.54890795 |
| C | 11.54802742 | 3.35677236  | 4.64683405  |
| O | 11.41118812 | 4.58172455  | 4.73842505  |
| C | 11.95356735 | -1.31798549 | 4.64683405  |
| O | 12.29591322 | -0.13391110 | 4.73842505  |
| H | 11.83555684 | -3.19458611 | 5.46315005  |

|   |             |              |             |
|---|-------------|--------------|-------------|
| H | 12.15714390 | 1.57785880   | 5.46315005  |
| C | 11.28023901 | -1.85307302  | 3.38243505  |
| H | 10.26515541 | -1.42700937  | 3.37494205  |
| H | 11.19564500 | -2.93852860  | 3.41533305  |
| C | 11.13072229 | 2.60474435   | 3.38243505  |
| H | 10.02985982 | 2.60992016   | 3.37494205  |
| H | 11.46795348 | 1.56954143   | 3.41533305  |
| C | 12.32667149 | 2.45269038   | 1.26504105  |
| O | 12.58885608 | 1.26021914   | 1.44017305  |
| C | 12.32696347 | -2.45122251  | 1.26504105  |
| O | 12.11285145 | -3.65325598  | 1.44017305  |
| N | 11.64013232 | 3.20221296   | 2.16386205  |
| N | 11.97951386 | -1.49602678  | 2.16386205  |
| H | 11.45228234 | 4.18923079   | 1.97732305  |
| H | 12.18367847 | -0.51225413  | 1.97732305  |
| N | 12.07749130 | -2.21912594  | 5.64661505  |
| N | 12.00736975 | 2.57165079   | 5.64661505  |
| C | 12.29540959 | 3.08184642   | 6.97877905  |
| H | 13.35303910 | 2.92735914   | 7.22622005  |
| H | 12.06842124 | 4.14449639   | 7.00144605  |
| C | 12.53884883 | -1.85799472  | 6.97877905  |
| H | 13.45685137 | -2.40545964  | 7.22622005  |
| H | 12.73579748 | -0.78936948  | 7.00144605  |
| C | 11.46373676 | -2.21973405  | 8.00373805  |
| O | 10.82283497 | -1.43586941  | 8.68287405  |
| C | 11.44056720 | 2.33621527   | 8.00373805  |
| O | 10.54847915 | 2.81514927   | 8.68287405  |
| O | 11.30377789 | -3.54411394  | 8.03012705  |
| H | 10.52342263 | -3.86083060  | 8.54573905  |
| O | 11.79960272 | 1.05143419   | 8.03012705  |
| H | 11.19985068 | 0.46019712   | 8.54573905  |
| C | 10.54102000 | -5.79492700  | -4.64656595 |
| O | 11.31199000 | -4.83322800  | -4.73773095 |
| C | 7.52101008  | -9.38768816  | -4.64656595 |
| O | 8.60131975  | -8.79423159  | -4.73773095 |
| H | 6.10908600  | -10.62899100 | -5.46417495 |



|   |             |              |             |
|---|-------------|--------------|-------------|
| H | 9.71159828  | -7.48206124  | -5.46417495 |
| C | 6.66632700  | -9.29016000  | -3.38234195 |
| H | 6.24849000  | -8.27161900  | -3.37533495 |
| H | 5.83982400  | -9.99883900  | -3.41540195 |
| C | 9.71407339  | -6.03189578  | -3.38234195 |
| H | 8.93826357  | -5.25078589  | -3.37533495 |
| H | 9.22168390  | -7.00291881  | -3.41540195 |
| C | 10.45001300 | -6.98247500  | -1.26311895 |
| O | 9.79061900  | -8.01028600  | -1.43694495 |
| C | 6.98247563  | -10.45001258 | -1.26311895 |
| O | 5.97994876  | -11.14724697 | -1.43694495 |
| C | 7.83855500  | -10.58145400 | 0.00077205  |
| H | 8.67439700  | -9.87688200  | 0.00038805  |
| H | 8.23959800  | -11.60220300 | 0.00066105  |
| C | 11.29122767 | -6.77630364  | 0.00077205  |
| H | 11.79381695 | -5.80550111  | 0.00038805  |
| H | 12.05236682 | -7.56588024  | 0.00066105  |
| N | 10.49648500 | -5.96860900  | -2.16369495 |
| N | 7.41339988  | -9.53110660  | -2.16369495 |
| H | 11.06029200 | -5.13693400  | -1.97735095 |
| H | 8.25255787  | -8.97849869  | -1.97735095 |
| N | 6.97019700  | -10.11067600 | -5.64711595 |
| N | 10.30881054 | -6.67366770  | -5.64711595 |
| C | 10.87414000 | -6.51674300  | -6.97890995 |
| H | 11.51385100 | -7.37330300  | -7.22556795 |
| H | 11.46427300 | -5.60436100  | -7.00159895 |
| C | 7.55254580  | -10.18203870 | -6.97890995 |
| H | 7.81577038  | -11.21820375 | -7.22556795 |
| H | 8.44691108  | -9.56494176  | -7.00159895 |
| C | 6.53741200  | -9.67903100  | -8.00532695 |
| O | 6.64039900  | -8.67375200  | -8.68736595 |
| C | 9.74378595  | -6.44049937  | -8.00532695 |
| O | 9.45422991  | -5.47233126  | -8.68736595 |
| O | 5.48657900  | -10.50083300 | -8.02987495 |
| H | 4.71273700  | -10.17409100 | -8.54890795 |
| O | 9.08743286  | -7.60188180  | -8.02987495 |

|   |             |              |             |
|---|-------------|--------------|-------------|
| H | 8.24745732  | -7.59614807  | -8.54890795 |
| C | 10.53928500 | -5.79209200  | 4.64683405  |
| O | 11.30869700 | -4.82916000  | 4.73842505  |
| C | 7.52049205  | -9.38440501  | 4.64683405  |
| O | 8.59983417  | -8.78921307  | 4.73842505  |
| H | 6.11008900  | -10.62791600 | 5.46315005  |
| H | 9.71211354  | -7.48068424  | 5.46315005  |
| C | 6.66601300  | -9.28665400  | 3.38243505  |
| H | 6.24951300  | -8.26760900  | 3.37494205  |
| H | 5.83866300  | -9.99437000  | 3.41533305  |
| C | 9.71244160  | -6.02877682  | 3.38243505  |
| H | 8.93767414  | -5.24668965  | 3.37494205  |
| H | 9.21890106  | -6.99923429  | 3.41533305  |
| C | 10.45058700 | -6.98195900  | 1.26504105  |
| O | 9.79277500  | -8.01055600  | 1.44017305  |
| C | 6.98320340  | -10.44975552 | 1.26504105  |
| O | 5.98183732  | -11.14832148 | 1.44017305  |
| N | 10.49512300 | -5.96651000  | 2.16386205  |
| N | 7.41294480  | -9.52864616  | 2.16386205  |
| H | 11.06022000 | -5.13575300  | 1.97732305  |
| H | 8.25294330  | -8.97738003  | 1.97732305  |
| N | 6.97091700  | -10.10923500 | 5.64661505  |
| N | 10.30892429 | -6.67206086  | 5.64661505  |
| C | 10.87336200 | -6.51497300  | 6.97877905  |
| H | 11.51198000 | -7.37206900  | 7.22622005  |
| H | 11.46426400 | -5.60306100  | 7.00144605  |
| C | 7.55250437  | -10.18010570 | 6.97877905  |
| H | 7.81451403  | -11.21634768 | 7.22622005  |
| H | 8.44740025  | -9.56373727  | 7.00144605  |
| C | 6.53649700  | -9.67567500  | 8.00373805  |
| O | 6.63758700  | -8.66821300  | 8.68287405  |
| C | 9.74165631  | -6.43774899  | 8.00373805  |
| O | 9.44951228  | -5.46829000  | 8.68287405  |
| O | 5.48691100  | -10.49904500 | 8.03012705  |
| H | 4.71116400  | -10.17120300 | 8.54573905  |
| O | 9.08705535  | -7.60010285  | 8.03012705  |

|   |             |              |             |
|---|-------------|--------------|-------------|
| H | 8.24489887  | -7.59408186  | 8.54573905  |
| C | 3.35599454  | -11.55125890 | -4.64656595 |
| O | 4.58117654  | -11.41639313 | -4.73773095 |
| C | -1.31994073 | -11.95625518 | -4.64656595 |
| O | -0.13640927 | -12.30051231 | -4.73773095 |
| H | -3.19605548 | -11.83560775 | -5.46417495 |
| H | 1.57652076  | -12.15775324 | -5.46417495 |
| C | -1.85533011 | -11.28294016 | -3.38234195 |
| H | -1.43056824 | -10.26726754 | -3.37533495 |
| H | -2.94086771 | -11.19962601 | -3.41540195 |
| C | 2.60369276  | -11.13408158 | -3.38234195 |
| H | 2.60744047  | -10.03317310 | -3.37533495 |
| H | 1.56890384  | -11.47252659 | -3.41540195 |
| C | 2.45191963  | -12.32663048 | -1.26311895 |
| O | 1.25888554  | -12.58714064 | -1.43694495 |
| C | -2.45191890 | -12.32663062 | -1.26311895 |
| O | -3.65383160 | -12.11075625 | -1.43694495 |
| C | -1.93952248 | -13.02491327 | 0.00077205  |
| H | -0.85028530 | -13.11773518 | 0.00038805  |
| H | -2.37772080 | -14.03027204 | 0.00066105  |
| C | 3.19253339  | -12.77567391 | 0.00077205  |
| H | 4.23437874  | -12.44459714 | 0.00038805  |
| H | 3.17242508  | -13.87219553 | 0.00066105  |
| N | 3.20169182  | -11.64257962 | -2.16369495 |
| N | -1.49744479 | -11.98157543 | -2.16369495 |
| H | 4.18844661  | -11.45316834 | -1.97735095 |
| H | -0.51331768 | -12.18419694 | -1.97735095 |
| N | -2.22065400 | -12.07800113 | -5.64711595 |
| N | 2.57043415  | -12.00842553 | -5.64711595 |
| C | 3.08114497  | -12.29721130 | -6.97890995 |
| H | 2.92780957  | -13.35523467 | -7.22556795 |
| H | 4.14358351  | -12.06934685 | -7.00159895 |
| C | -1.85933226 | -12.54024496 | -6.97890995 |
| H | -2.40588371 | -13.45905218 | -7.22556795 |
| H | -0.79056708 | -12.73630328 | -7.00159895 |
| C | -2.22146010 | -11.46675681 | -8.00532695 |

|   |             |              |             |
|---|-------------|--------------|-------------|
| O | -1.43779769 | -10.82874002 | -8.68736595 |
| C | 2.33577634  | -11.44401790 | -8.00532695 |
| O | 2.81562754  | -10.55467262 | -8.68736595 |
| O | -3.54561301 | -11.30480744 | -8.02987495 |
| H | -3.86176045 | -10.52657703 | -8.54890795 |
| O | 1.05044323  | -11.80112757 | -8.02987495 |
| H | 0.46054519  | -11.20312081 | -8.54890795 |
| C | 3.35677236  | -11.54802742 | 4.64683405  |
| O | 4.58172455  | -11.41118812 | 4.73842505  |
| C | -1.31798549 | -11.95356735 | 4.64683405  |
| O | -0.13391110 | -12.29591322 | 4.73842505  |
| H | -3.19458611 | -11.83555684 | 5.46315005  |
| H | 1.57785880  | -12.15714390 | 5.46315005  |
| C | -1.85307302 | -11.28023901 | 3.38243505  |
| H | -1.42700937 | -10.26515541 | 3.37494205  |
| H | -2.93852860 | -11.19564500 | 3.41533305  |
| C | 2.60474435  | -11.13072229 | 3.38243505  |
| H | 2.60992016  | -10.02985982 | 3.37494205  |
| H | 1.56954143  | -11.46795348 | 3.41533305  |
| C | 2.45269038  | -12.32667149 | 1.26504105  |
| O | 1.26021914  | -12.58885608 | 1.44017305  |
| C | -2.45122251 | -12.32696347 | 1.26504105  |
| O | -3.65325598 | -12.11285145 | 1.44017305  |
| N | 3.20221296  | -11.64013232 | 2.16386205  |
| N | -1.49602678 | -11.97951386 | 2.16386205  |
| H | 4.18923079  | -11.45228234 | 1.97732305  |
| H | -0.51225413 | -12.18367847 | 1.97732305  |
| N | -2.21912594 | -12.07749130 | 5.64661505  |
| N | 2.57165079  | -12.00736975 | 5.64661505  |
| C | 3.08184642  | -12.29540959 | 6.97877905  |
| H | 2.92735914  | -13.35303910 | 7.22622005  |
| H | 4.14449639  | -12.06842124 | 7.00144605  |
| C | -1.85799472 | -12.53884883 | 6.97877905  |
| H | -2.40545964 | -13.45685137 | 7.22622005  |
| H | -0.78936948 | -12.73579748 | 7.00144605  |
| C | -2.21973405 | -11.46373676 | 8.00373805  |

|   |              |              |             |
|---|--------------|--------------|-------------|
| O | -1.43586941  | -10.82283497 | 8.68287405  |
| C | 2.33621527   | -11.44056720 | 8.00373805  |
| O | 2.81514927   | -10.54847915 | 8.68287405  |
| O | -3.54411394  | -11.30377789 | 8.03012705  |
| H | -3.86083060  | -10.52342263 | 8.54573905  |
| O | 1.05143419   | -11.79960272 | 8.03012705  |
| H | 0.46019712   | -11.19985068 | 8.54573905  |
| C | -5.79492700  | -10.54102000 | -4.64656595 |
| O | -4.83322800  | -11.31199000 | -4.73773095 |
| C | -9.38768816  | -7.52101008  | -4.64656595 |
| O | -8.79423159  | -8.60131975  | -4.73773095 |
| H | -10.62899100 | -6.10908600  | -5.46417495 |
| H | -7.48206124  | -9.71159828  | -5.46417495 |
| C | -9.29016000  | -6.66632700  | -3.38234195 |
| H | -8.27161900  | -6.24849000  | -3.37533495 |
| H | -9.99883900  | -5.83982400  | -3.41540195 |
| C | -6.03189578  | -9.71407339  | -3.38234195 |
| H | -5.25078589  | -8.93826357  | -3.37533495 |
| H | -7.00291881  | -9.22168390  | -3.41540195 |
| C | -6.98247500  | -10.45001300 | -1.26311895 |
| O | -8.01028600  | -9.79061900  | -1.43694495 |
| C | -10.45001258 | -6.98247563  | -1.26311895 |
| O | -11.14724697 | -5.97994876  | -1.43694495 |
| C | -10.58145400 | -7.83855500  | 0.00077205  |
| H | -9.87688200  | -8.67439700  | 0.00038805  |
| H | -11.60220300 | -8.23959800  | 0.00066105  |
| C | -6.77630364  | -11.29122767 | 0.00077205  |
| H | -5.80550111  | -11.79381695 | 0.00038805  |
| H | -7.56588024  | -12.05236682 | 0.00066105  |
| N | -5.96860900  | -10.49648500 | -2.16369495 |
| N | -9.53110660  | -7.41339988  | -2.16369495 |
| H | -5.13693400  | -11.06029200 | -1.97735095 |
| H | -8.97849869  | -8.25255787  | -1.97735095 |
| N | -10.11067600 | -6.97019700  | -5.64711595 |
| N | -6.67366770  | -10.30881054 | -5.64711595 |
| C | -6.51674300  | -10.87414000 | -6.97890995 |

|   |              |              |             |
|---|--------------|--------------|-------------|
| H | -7.37330300  | -11.51385100 | -7.22556795 |
| H | -5.60436100  | -11.46427300 | -7.00159895 |
| C | -10.18203870 | -7.55254580  | -6.97890995 |
| H | -11.21820375 | -7.81577038  | -7.22556795 |
| H | -9.56494176  | -8.44691108  | -7.00159895 |
| C | -9.67903100  | -6.53741200  | -8.00532695 |
| O | -8.67375200  | -6.64039900  | -8.68736595 |
| C | -6.44049937  | -9.74378595  | -8.00532695 |
| O | -5.47233126  | -9.45422991  | -8.68736595 |
| O | -10.50083300 | -5.48657900  | -8.02987495 |
| H | -10.17409100 | -4.71273700  | -8.54890795 |
| O | -7.60188180  | -9.08743286  | -8.02987495 |
| H | -7.59614807  | -8.24745732  | -8.54890795 |
| C | -5.79209200  | -10.53928500 | 4.64683405  |
| O | -4.82916000  | -11.30869700 | 4.73842505  |
| C | -9.38440501  | -7.52049205  | 4.64683405  |
| O | -8.78921307  | -8.59983417  | 4.73842505  |
| H | -10.62791600 | -6.11008900  | 5.46315005  |
| H | -7.48068424  | -9.71211354  | 5.46315005  |
| C | -9.28665400  | -6.66601300  | 3.38243505  |
| H | -8.26760900  | -6.24951300  | 3.37494205  |
| H | -9.99437000  | -5.83866300  | 3.41533305  |
| C | -6.02877682  | -9.71244160  | 3.38243505  |
| H | -5.24668965  | -8.93767414  | 3.37494205  |
| H | -6.99923429  | -9.21890106  | 3.41533305  |
| C | -6.98195900  | -10.45058700 | 1.26504105  |
| O | -8.01055600  | -9.79277500  | 1.44017305  |
| C | -10.44975552 | -6.98320340  | 1.26504105  |
| O | -11.14832148 | -5.98183732  | 1.44017305  |
| N | -5.96651000  | -10.49512300 | 2.16386205  |
| N | -9.52864616  | -7.41294480  | 2.16386205  |
| H | -5.13575300  | -11.06022000 | 1.97732305  |
| H | -8.97738003  | -8.25294330  | 1.97732305  |
| N | -10.10923500 | -6.97091700  | 5.64661505  |
| N | -6.67206086  | -10.30892429 | 5.64661505  |
| C | -6.51497300  | -10.87336200 | 6.97877905  |

|   |              |              |             |
|---|--------------|--------------|-------------|
| H | -7.37206900  | -11.51198000 | 7.22622005  |
| H | -5.60306100  | -11.46426400 | 7.00144605  |
| C | -10.18010570 | -7.55250437  | 6.97877905  |
| H | -11.21634768 | -7.81451403  | 7.22622005  |
| H | -9.56373727  | -8.44740025  | 7.00144605  |
| C | -9.67567500  | -6.53649700  | 8.00373805  |
| O | -8.66821300  | -6.63758700  | 8.68287405  |
| C | -6.43774899  | -9.74165631  | 8.00373805  |
| O | -5.46829000  | -9.44951228  | 8.68287405  |
| O | -10.49904500 | -5.48691100  | 8.03012705  |
| H | -10.17120300 | -4.71116400  | 8.54573905  |
| O | -7.60010285  | -9.08705535  | 8.03012705  |
| H | -7.59408186  | -8.24489887  | 8.54573905  |
| C | -11.55125890 | -3.35599454  | -4.64656595 |
| O | -11.41639313 | -4.58117654  | -4.73773095 |
| C | -11.95625518 | 1.31994073   | -4.64656595 |
| O | -12.30051231 | 0.13640927   | -4.73773095 |
| H | -11.83560775 | 3.19605548   | -5.46417495 |
| H | -12.15775324 | -1.57652076  | -5.46417495 |
| C | -11.28294016 | 1.85533011   | -3.38234195 |
| H | -10.26726754 | 1.43056824   | -3.37533495 |
| H | -11.19962601 | 2.94086771   | -3.41540195 |
| C | -11.13408158 | -2.60369276  | -3.38234195 |
| H | -10.03317310 | -2.60744047  | -3.37533495 |
| H | -11.47252659 | -1.56890384  | -3.41540195 |
| C | -12.32663048 | -2.45191963  | -1.26311895 |
| O | -12.58714064 | -1.25888554  | -1.43694495 |
| C | -12.32663062 | 2.45191890   | -1.26311895 |
| O | -12.11075625 | 3.65383160   | -1.43694495 |
| C | -13.02491327 | 1.93952248   | 0.00077205  |
| H | -13.11773518 | 0.85028530   | 0.00038805  |
| H | -14.03027204 | 2.37772080   | 0.00066105  |
| C | -12.77567391 | -3.19253339  | 0.00077205  |
| H | -12.44459714 | -4.23437874  | 0.00038805  |
| H | -13.87219553 | -3.17242508  | 0.00066105  |
| N | -11.64257962 | -3.20169182  | -2.16369495 |

|   |              |             |             |
|---|--------------|-------------|-------------|
| N | -11.98157543 | 1.49744479  | -2.16369495 |
| H | -11.45316834 | -4.18844661 | -1.97735095 |
| H | -12.18419694 | 0.51331768  | -1.97735095 |
| N | -12.07800113 | 2.22065400  | -5.64711595 |
| N | -12.00842553 | -2.57043415 | -5.64711595 |
| C | -12.29721130 | -3.08114497 | -6.97890995 |
| H | -13.35523467 | -2.92780957 | -7.22556795 |
| H | -12.06934685 | -4.14358351 | -7.00159895 |
| C | -12.54024496 | 1.85933226  | -6.97890995 |
| H | -13.45905218 | 2.40588371  | -7.22556795 |
| H | -12.73630328 | 0.79056708  | -7.00159895 |
| C | -11.46675681 | 2.22146010  | -8.00532695 |
| O | -10.82874002 | 1.43779769  | -8.68736595 |
| C | -11.44401790 | -2.33577634 | -8.00532695 |
| O | -10.55467262 | -2.81562754 | -8.68736595 |
| O | -11.30480744 | 3.54561301  | -8.02987495 |
| H | -10.52657703 | 3.86176045  | -8.54890795 |
| O | -11.80112757 | -1.05044323 | -8.02987495 |
| H | -11.20312081 | -0.46054519 | -8.54890795 |
| C | -11.54802742 | -3.35677236 | 4.64683405  |
| O | -11.41118812 | -4.58172455 | 4.73842505  |
| C | -11.95356735 | 1.31798549  | 4.64683405  |
| O | -12.29591322 | 0.13391110  | 4.73842505  |
| H | -11.83555684 | 3.19458611  | 5.46315005  |
| H | -12.15714390 | -1.57785880 | 5.46315005  |
| C | -11.28023901 | 1.85307302  | 3.38243505  |
| H | -10.26515541 | 1.42700937  | 3.37494205  |
| H | -11.19564500 | 2.93852860  | 3.41533305  |
| C | -11.13072229 | -2.60474435 | 3.38243505  |
| H | -10.02985982 | -2.60992016 | 3.37494205  |
| H | -11.46795348 | -1.56954143 | 3.41533305  |
| C | -12.32667149 | -2.45269038 | 1.26504105  |
| O | -12.58885608 | -1.26021914 | 1.44017305  |
| C | -12.32696347 | 2.45122251  | 1.26504105  |
| O | -12.11285145 | 3.65325598  | 1.44017305  |
| N | -11.64013232 | -3.20221296 | 2.16386205  |



|   |              |             |             |
|---|--------------|-------------|-------------|
| N | -11.97951386 | 1.49602678  | 2.16386205  |
| H | -11.45228234 | -4.18923079 | 1.97732305  |
| H | -12.18367847 | 0.51225413  | 1.97732305  |
| N | -12.07749130 | 2.21912594  | 5.64661505  |
| N | -12.00736975 | -2.57165079 | 5.64661505  |
| C | -12.29540959 | -3.08184642 | 6.97877905  |
| H | -13.35303910 | -2.92735914 | 7.22622005  |
| H | -12.06842124 | -4.14449639 | 7.00144605  |
| C | -12.53884883 | 1.85799472  | 6.97877905  |
| H | -13.45685137 | 2.40545964  | 7.22622005  |
| H | -12.73579748 | 0.78936948  | 7.00144605  |
| C | -11.46373676 | 2.21973405  | 8.00373805  |
| O | -10.82283497 | 1.43586941  | 8.68287405  |
| C | -11.44056720 | -2.33621527 | 8.00373805  |
| O | -10.54847915 | -2.81514927 | 8.68287405  |
| O | -11.30377789 | 3.54411394  | 8.03012705  |
| H | -10.52342263 | 3.86083060  | 8.54573905  |
| O | -11.79960272 | -1.05143419 | 8.03012705  |
| H | -11.19985068 | -0.46019712 | 8.54573905  |
| C | -10.54102000 | 5.79492700  | -4.64656595 |
| O | -11.31199000 | 4.83322800  | -4.73773095 |
| C | -7.52101008  | 9.38768816  | -4.64656595 |
| O | -8.60131975  | 8.79423159  | -4.73773095 |
| H | -6.10908600  | 10.62899100 | -5.46417495 |
| H | -9.71159828  | 7.48206124  | -5.46417495 |
| C | -6.66632700  | 9.29016000  | -3.38234195 |
| H | -6.24849000  | 8.27161900  | -3.37533495 |
| H | -5.83982400  | 9.99883900  | -3.41540195 |
| C | -9.71407339  | 6.03189578  | -3.38234195 |
| H | -8.93826357  | 5.25078589  | -3.37533495 |
| H | -9.22168390  | 7.00291881  | -3.41540195 |
| C | -10.45001300 | 6.98247500  | -1.26311895 |
| O | -9.79061900  | 8.01028600  | -1.43694495 |
| C | -6.98247563  | 10.45001258 | -1.26311895 |
| O | -5.97994876  | 11.14724697 | -1.43694495 |
| C | -7.83855500  | 10.58145400 | 0.00077205  |

|   |              |             |             |
|---|--------------|-------------|-------------|
| H | -8.67439700  | 9.87688200  | 0.00038805  |
| H | -8.23959800  | 11.60220300 | 0.00066105  |
| C | -11.29122767 | 6.77630364  | 0.00077205  |
| H | -11.79381695 | 5.80550111  | 0.00038805  |
| H | -12.05236682 | 7.56588024  | 0.00066105  |
| N | -10.49648500 | 5.96860900  | -2.16369495 |
| N | -7.41339988  | 9.53110660  | -2.16369495 |
| H | -11.06029200 | 5.13693400  | -1.97735095 |
| H | -8.25255787  | 8.97849869  | -1.97735095 |
| N | -6.97019700  | 10.11067600 | -5.64711595 |
| N | -10.30881054 | 6.67366770  | -5.64711595 |
| C | -10.87414000 | 6.51674300  | -6.97890995 |
| H | -11.51385100 | 7.37330300  | -7.22556795 |
| H | -11.46427300 | 5.60436100  | -7.00159895 |
| C | -7.55254580  | 10.18203870 | -6.97890995 |
| H | -7.81577038  | 11.21820375 | -7.22556795 |
| H | -8.44691108  | 9.56494176  | -7.00159895 |
| C | -6.53741200  | 9.67903100  | -8.00532695 |
| O | -6.64039900  | 8.67375200  | -8.68736595 |
| C | -9.74378595  | 6.44049937  | -8.00532695 |
| O | -9.45422991  | 5.47233126  | -8.68736595 |
| O | -5.48657900  | 10.50083300 | -8.02987495 |
| H | -4.71273700  | 10.17409100 | -8.54890795 |
| O | -9.08743286  | 7.60188180  | -8.02987495 |
| H | -8.24745732  | 7.59614807  | -8.54890795 |
| C | -10.53928500 | 5.79209200  | 4.64683405  |
| O | -11.30869700 | 4.82916000  | 4.73842505  |
| C | -7.52049205  | 9.38440501  | 4.64683405  |
| O | -8.59983417  | 8.78921307  | 4.73842505  |
| H | -6.11008900  | 10.62791600 | 5.46315005  |
| H | -9.71211354  | 7.48068424  | 5.46315005  |
| C | -6.66601300  | 9.28665400  | 3.38243505  |
| H | -6.24951300  | 8.26760900  | 3.37494205  |
| H | -5.83866300  | 9.99437000  | 3.41533305  |
| C | -9.71244160  | 6.02877682  | 3.38243505  |
| H | -8.93767414  | 5.24668965  | 3.37494205  |

|   |              |             |             |
|---|--------------|-------------|-------------|
| H | -9.21890106  | 6.99923429  | 3.41533305  |
| C | -10.45058700 | 6.98195900  | 1.26504105  |
| O | -9.79277500  | 8.01055600  | 1.44017305  |
| C | -6.98320340  | 10.44975552 | 1.26504105  |
| O | -5.98183732  | 11.14832148 | 1.44017305  |
| N | -10.49512300 | 5.96651000  | 2.16386205  |
| N | -7.41294480  | 9.52864616  | 2.16386205  |
| H | -11.06022000 | 5.13575300  | 1.97732305  |
| H | -8.25294330  | 8.97738003  | 1.97732305  |
| N | -6.97091700  | 10.10923500 | 5.64661505  |
| N | -10.30892429 | 6.67206086  | 5.64661505  |
| C | -10.87336200 | 6.51497300  | 6.97877905  |
| H | -11.51198000 | 7.37206900  | 7.22622005  |
| H | -11.46426400 | 5.60306100  | 7.00144605  |
| C | -7.55250437  | 10.18010570 | 6.97877905  |
| H | -7.81451403  | 11.21634768 | 7.22622005  |
| H | -8.44740025  | 9.56373727  | 7.00144605  |
| C | -6.53649700  | 9.67567500  | 8.00373805  |
| O | -6.63758700  | 8.66821300  | 8.68287405  |
| C | -9.74165631  | 6.43774899  | 8.00373805  |
| O | -9.44951228  | 5.46829000  | 8.68287405  |
| O | -5.48691100  | 10.49904500 | 8.03012705  |
| H | -4.71116400  | 10.17120300 | 8.54573905  |
| O | -9.08705535  | 7.60010285  | 8.03012705  |
| H | -8.24489887  | 7.59408186  | 8.54573905  |
| C | -3.35599454  | 11.55125890 | -4.64656595 |
| O | -4.58117654  | 11.41639313 | -4.73773095 |
| C | 1.31994073   | 11.95625518 | -4.64656595 |
| O | 0.13640927   | 12.30051231 | -4.73773095 |
| H | 3.19605548   | 11.83560775 | -5.46417495 |
| H | -1.57652076  | 12.15775324 | -5.46417495 |
| C | 1.85533011   | 11.28294016 | -3.38234195 |
| H | 1.43056824   | 10.26726754 | -3.37533495 |
| H | 2.94086771   | 11.19962601 | -3.41540195 |
| C | -2.60369276  | 11.13408158 | -3.38234195 |
| H | -2.60744047  | 10.03317310 | -3.37533495 |

|   |             |             |             |
|---|-------------|-------------|-------------|
| H | -1.56890384 | 11.47252659 | -3.41540195 |
| C | -2.45191963 | 12.32663048 | -1.26311895 |
| O | -1.25888554 | 12.58714064 | -1.43694495 |
| C | 2.45191890  | 12.32663062 | -1.26311895 |
| O | 3.65383160  | 12.11075625 | -1.43694495 |
| C | 1.93952248  | 13.02491327 | 0.00077205  |
| H | 0.85028530  | 13.11773518 | 0.00038805  |
| H | 2.37772080  | 14.03027204 | 0.00066105  |
| C | -3.19253339 | 12.77567391 | 0.00077205  |
| H | -4.23437874 | 12.44459714 | 0.00038805  |
| H | -3.17242508 | 13.87219553 | 0.00066105  |
| N | -3.20169182 | 11.64257962 | -2.16369495 |
| N | 1.49744479  | 11.98157543 | -2.16369495 |
| H | -4.18844661 | 11.45316834 | -1.97735095 |
| H | 0.51331768  | 12.18419694 | -1.97735095 |
| N | 2.22065400  | 12.07800113 | -5.64711595 |
| N | -2.57043415 | 12.00842553 | -5.64711595 |
| C | -3.08114497 | 12.29721130 | -6.97890995 |
| H | -2.92780957 | 13.35523467 | -7.22556795 |
| H | -4.14358351 | 12.06934685 | -7.00159895 |
| C | 1.85933226  | 12.54024496 | -6.97890995 |
| H | 2.40588371  | 13.45905218 | -7.22556795 |
| H | 0.79056708  | 12.73630328 | -7.00159895 |
| C | 2.22146010  | 11.46675681 | -8.00532695 |
| O | 1.43779769  | 10.82874002 | -8.68736595 |
| C | -2.33577634 | 11.44401790 | -8.00532695 |
| O | -2.81562754 | 10.55467262 | -8.68736595 |
| O | 3.54561301  | 11.30480744 | -8.02987495 |
| H | 3.86176045  | 10.52657703 | -8.54890795 |
| O | -1.05044323 | 11.80112757 | -8.02987495 |
| H | -0.46054519 | 11.20312081 | -8.54890795 |
| C | -3.35677236 | 11.54802742 | 4.64683405  |
| O | -4.58172455 | 11.41118812 | 4.73842505  |
| C | 1.31798549  | 11.95356735 | 4.64683405  |
| O | 0.13391110  | 12.29591322 | 4.73842505  |
| H | 3.19458611  | 11.83555684 | 5.46315005  |

|   |             |             |            |
|---|-------------|-------------|------------|
| H | -1.57785880 | 12.15714390 | 5.46315005 |
| C | 1.85307302  | 11.28023901 | 3.38243505 |
| H | 1.42700937  | 10.26515541 | 3.37494205 |
| H | 2.93852860  | 11.19564500 | 3.41533305 |
| C | -2.60474435 | 11.13072229 | 3.38243505 |
| H | -2.60992016 | 10.02985982 | 3.37494205 |
| H | -1.56954143 | 11.46795348 | 3.41533305 |
| C | -2.45269038 | 12.32667149 | 1.26504105 |
| O | -1.26021914 | 12.58885608 | 1.44017305 |
| C | 2.45122251  | 12.32696347 | 1.26504105 |
| O | 3.65325598  | 12.11285145 | 1.44017305 |
| N | -3.20221296 | 11.64013232 | 2.16386205 |
| N | 1.49602678  | 11.97951386 | 2.16386205 |
| H | -4.18923079 | 11.45228234 | 1.97732305 |
| H | 0.51225413  | 12.18367847 | 1.97732305 |
| N | 2.21912594  | 12.07749130 | 5.64661505 |
| N | -2.57165079 | 12.00736975 | 5.64661505 |
| C | -3.08184642 | 12.29540959 | 6.97877905 |
| H | -2.92735914 | 13.35303910 | 7.22622005 |
| H | -4.14449639 | 12.06842124 | 7.00144605 |
| C | 1.85799472  | 12.53884883 | 6.97877905 |
| H | 2.40545964  | 13.45685137 | 7.22622005 |
| H | 0.78936948  | 12.73579748 | 7.00144605 |
| C | 2.21973405  | 11.46373676 | 8.00373805 |
| O | 1.43586941  | 10.82283497 | 8.68287405 |
| C | -2.33621527 | 11.44056720 | 8.00373805 |
| O | -2.81514927 | 10.54847915 | 8.68287405 |
| O | 3.54411394  | 11.30377789 | 8.03012705 |
| H | 3.86083060  | 10.52342263 | 8.54573905 |
| O | -1.05143419 | 11.79960272 | 8.03012705 |
| H | -0.46019712 | 11.19985068 | 8.54573905 |
